# Supplementary material for: Ru-catalyzed asymmetric hydrogenation of δ-keto Weinreb amides: enantioselective synthesis of (+)-Centrolobine
Source: Royal Society of Chemistry journal article supplement (doi:10.1039/c5ob02622a), 2016-01-01
Supplement: c5ob02622a1.pdf [file c5ob02622a1.pdf]

*Supporting Information*

**Ru-Catalyzed Asymmetric Hydrogenation of  $\delta$ -Keto Weinreb Amides:  
Enantioselective Synthesis of (+)-Centrolobine**

Mengmeng Zhao,<sup>†</sup> Bin Lu,<sup>†</sup> Guangni Ding,<sup>†</sup> Kai Ren,<sup>†</sup> Xiaomin Xie,<sup>†</sup> and Zhaoguo Zhang<sup>\*†‡</sup>

<sup>†</sup>School of Chemistry and Chemical Engineering, Shanghai Jiao Tong University, 800 Dongchuan Road,  
Shanghai 200240, China

<sup>‡</sup>Shanghai Institute of Organic Chemistry, 345 Lingling Road, Shanghai 200032, China

[zhaoguo@sjtu.edu.cn](mailto:zhaoguo@sjtu.edu.cn)

**Table of Contents**

|                                                     |            |
|-----------------------------------------------------|------------|
| <b>NMR data for compounds 1, 2.....</b>             | <b>S2</b>  |
| <b>HPLC for racemic and chiral compounds 2.....</b> | <b>S32</b> |

Copy of NMR spectra for 1, 2

*N*-Methoxy-*N*-methyl-5-oxo-5-phenylpentanamide, (1a)

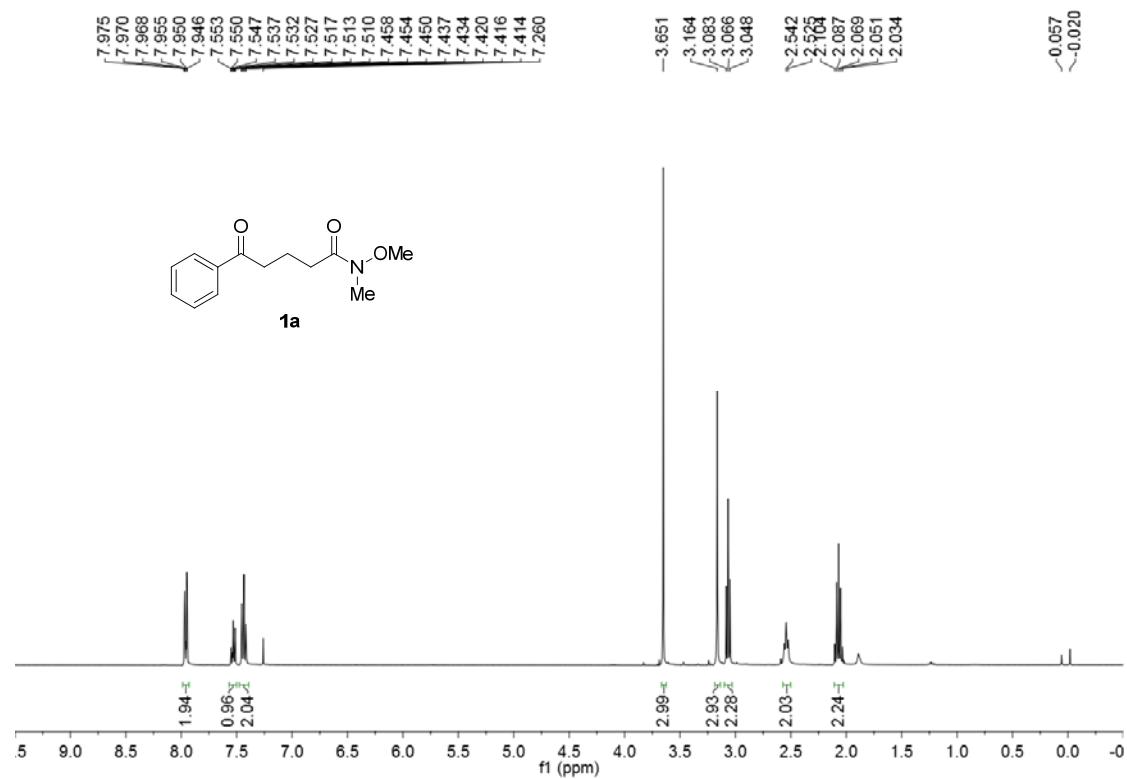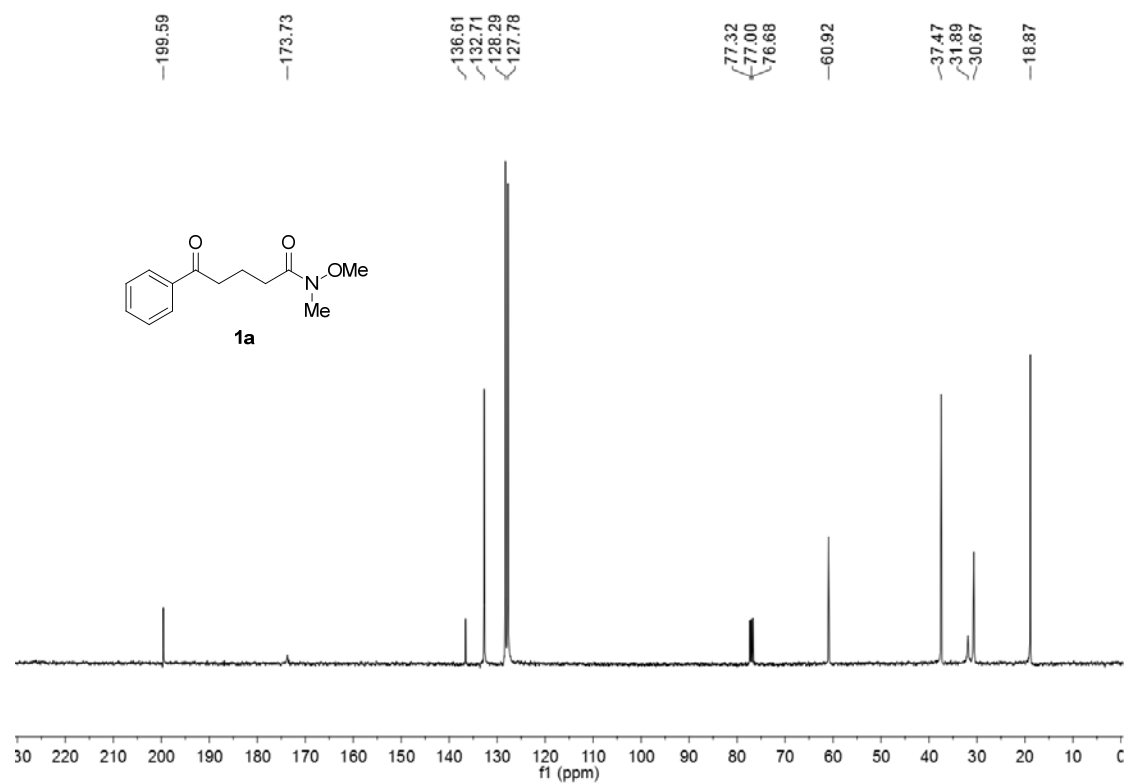

***N*-Methoxy-*N*-methyl-5-oxo-5-(*p*-tolyl)pentanamide, (1b)**

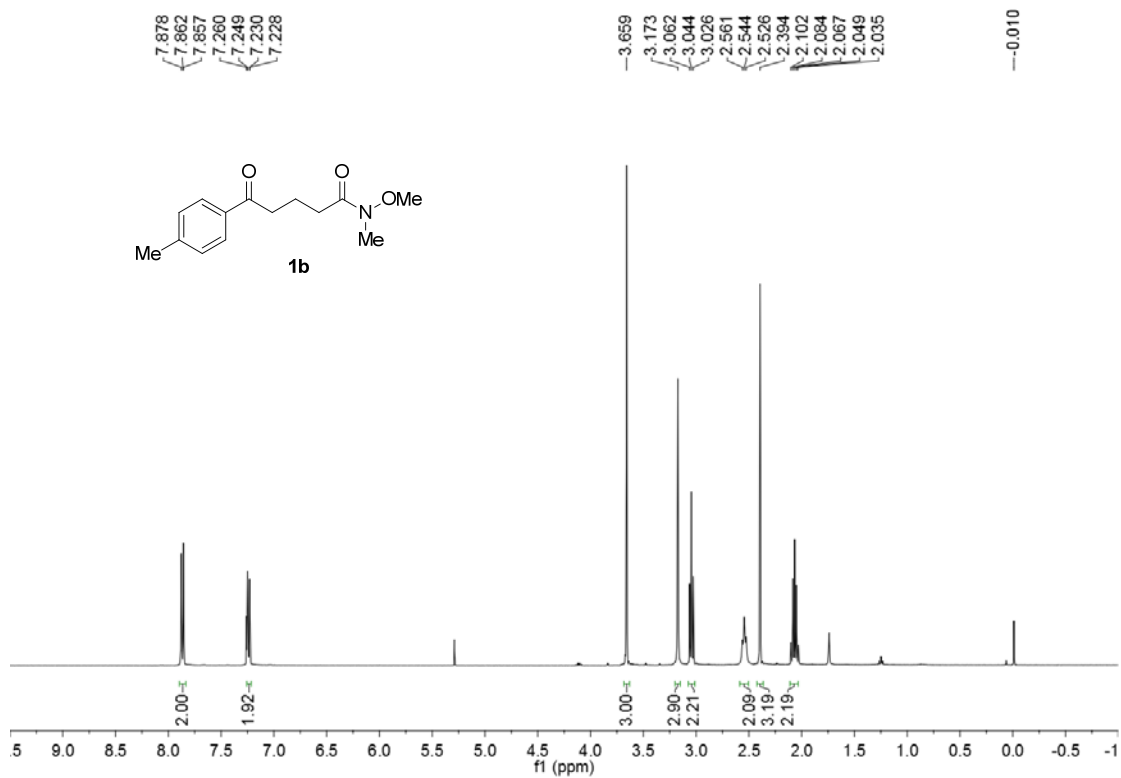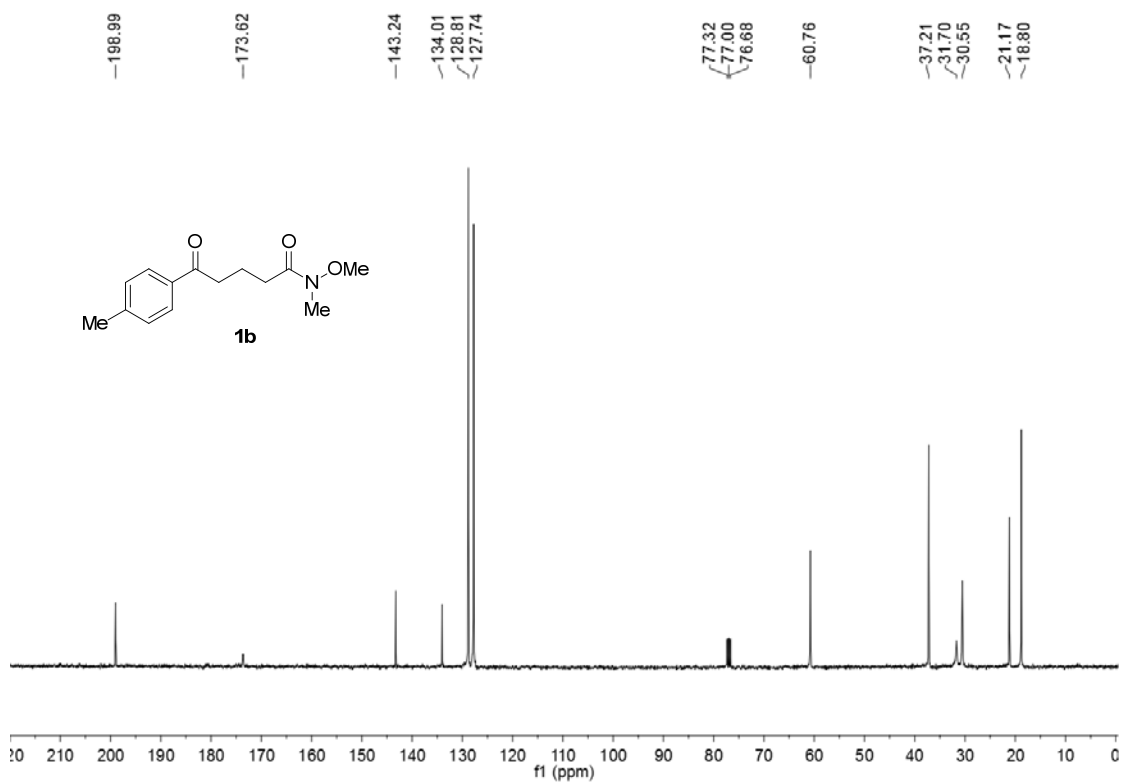

***N*-Methoxy-*N*-methyl-5-oxo-5-(4-methoxyphenyl)pentanamide, (1c)**

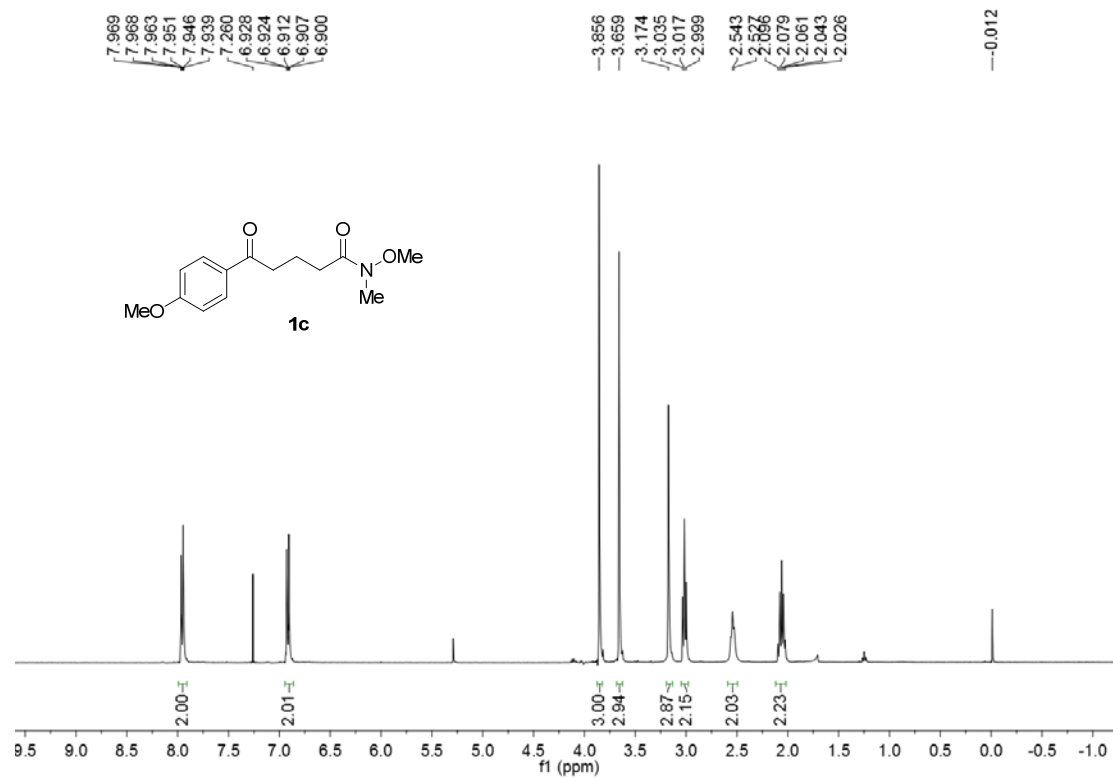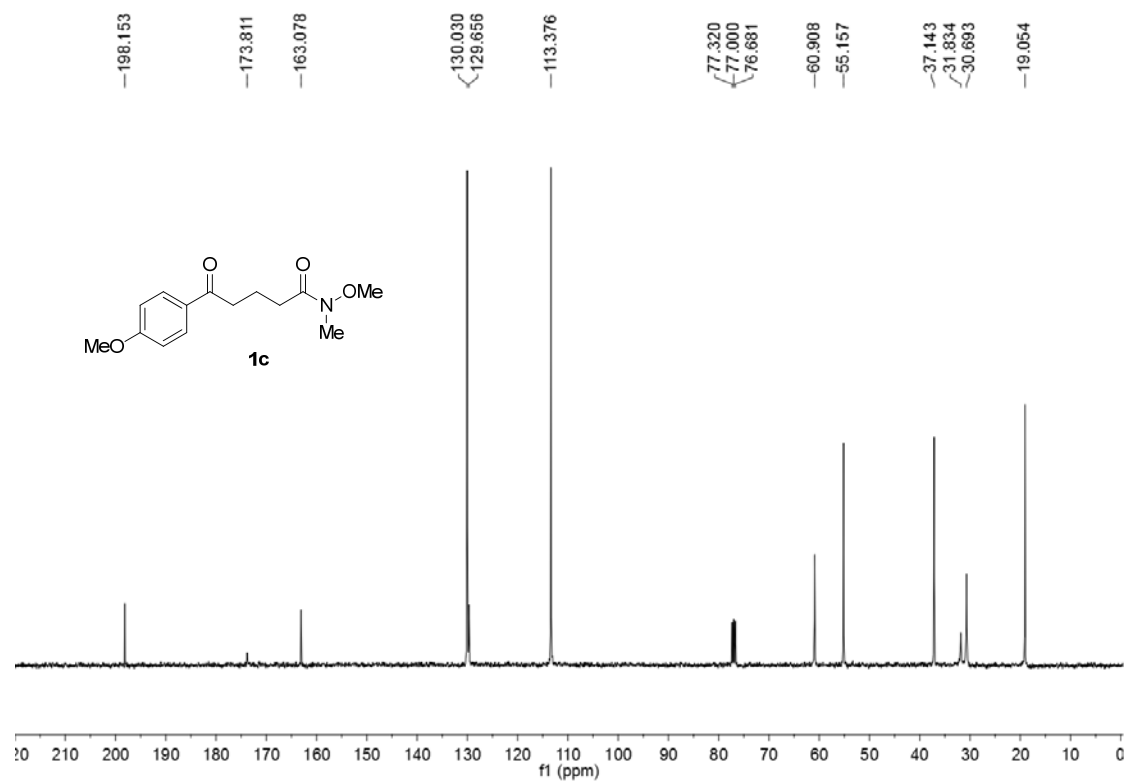

***N*-Methoxy-*N*-methyl-5-oxo-5-(4-(trifluoromethyl)phenyl)pentanamide, (1d)**

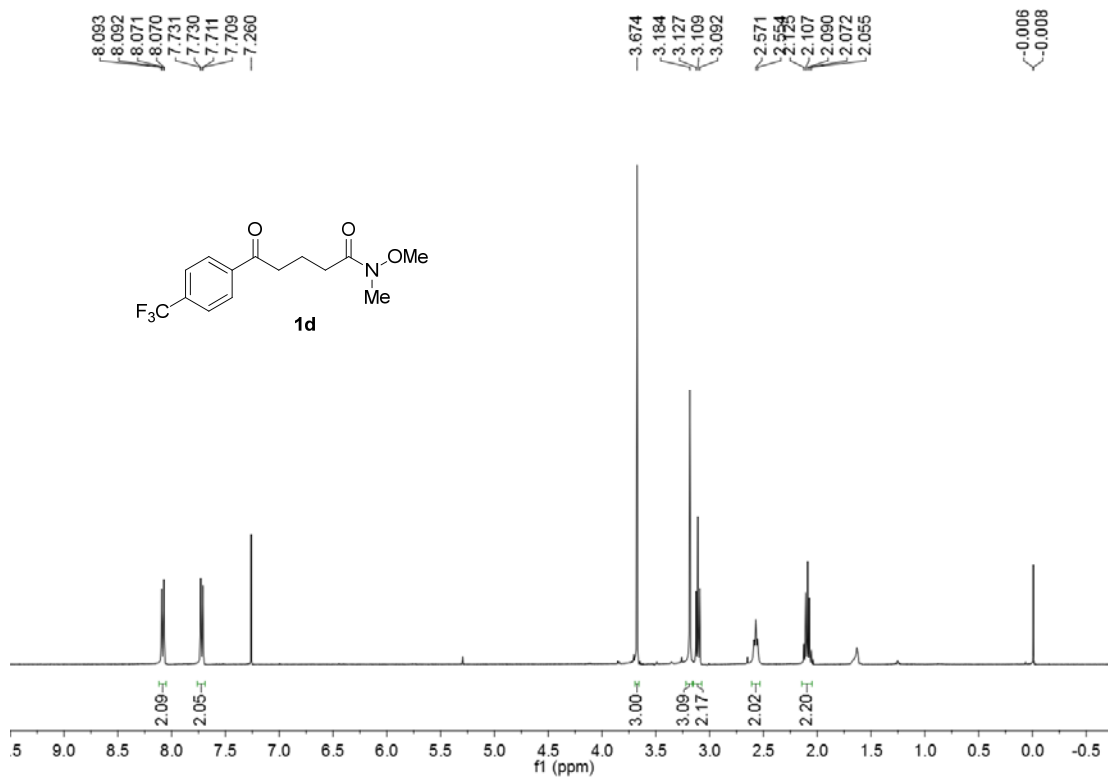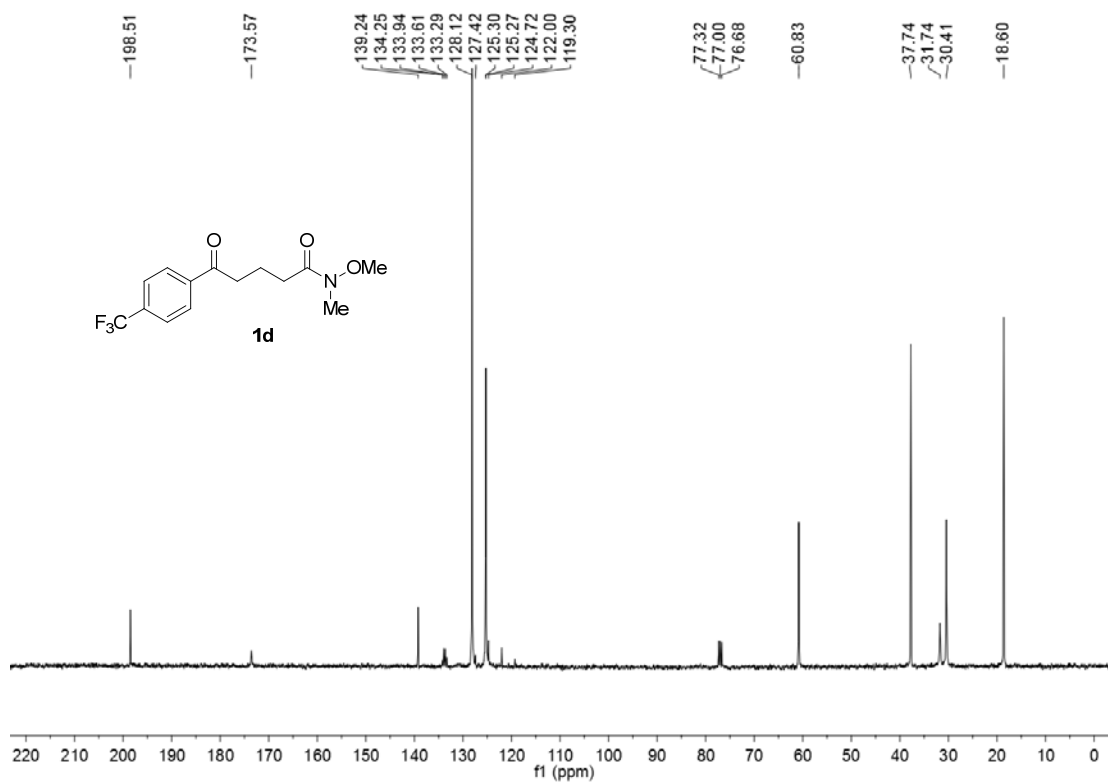

***N*-Methoxy-*N*-methyl-5-oxo-5-(4-fluorophenyl)pentanamide, (1e)**

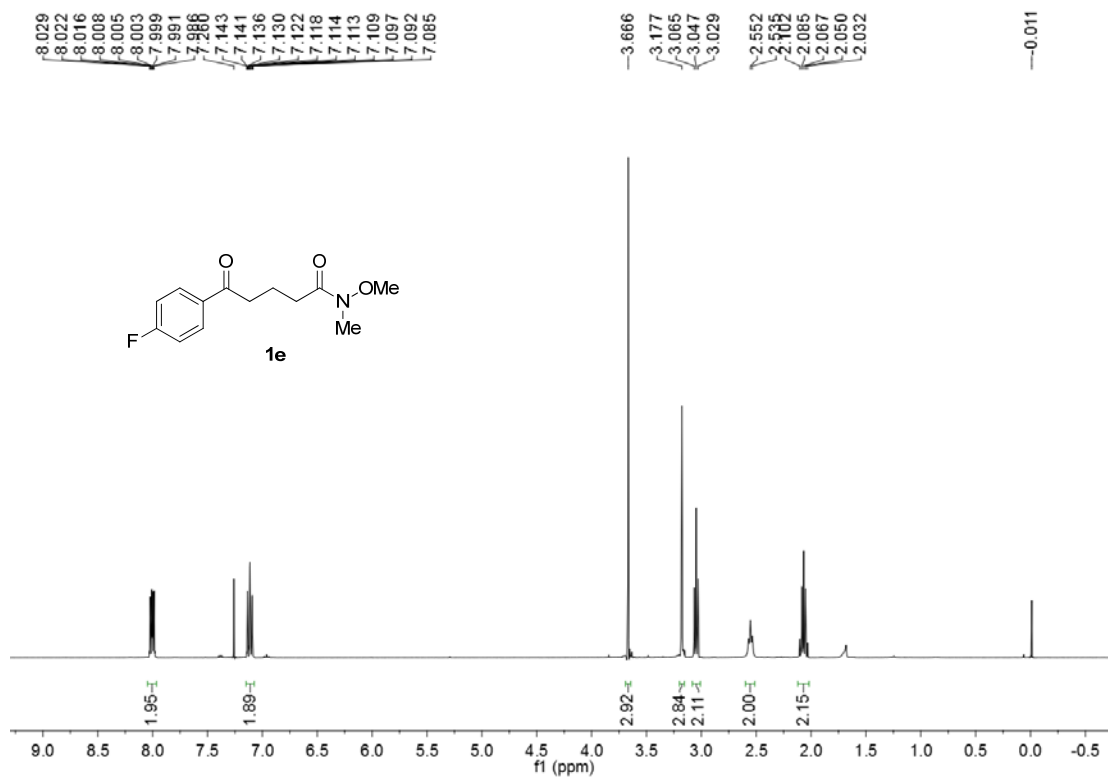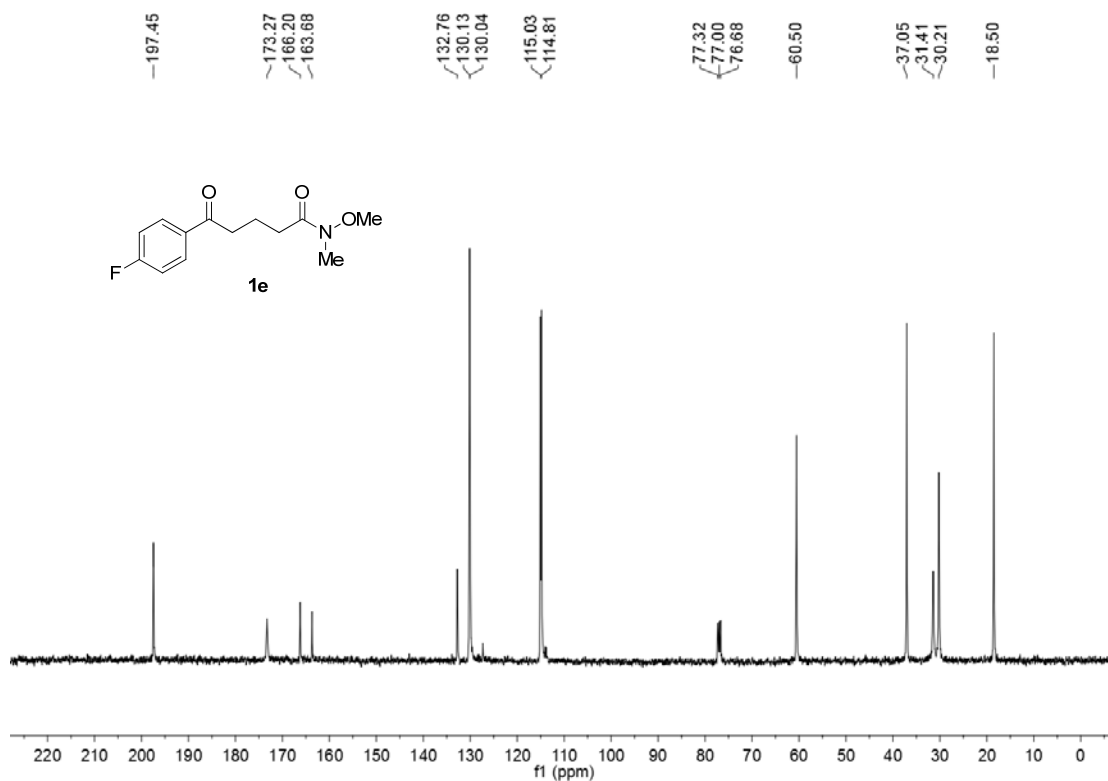

***N*-Methoxy-*N*-methyl-5-oxo-5-(4-chlorophenyl)pentanamide, (1f)**

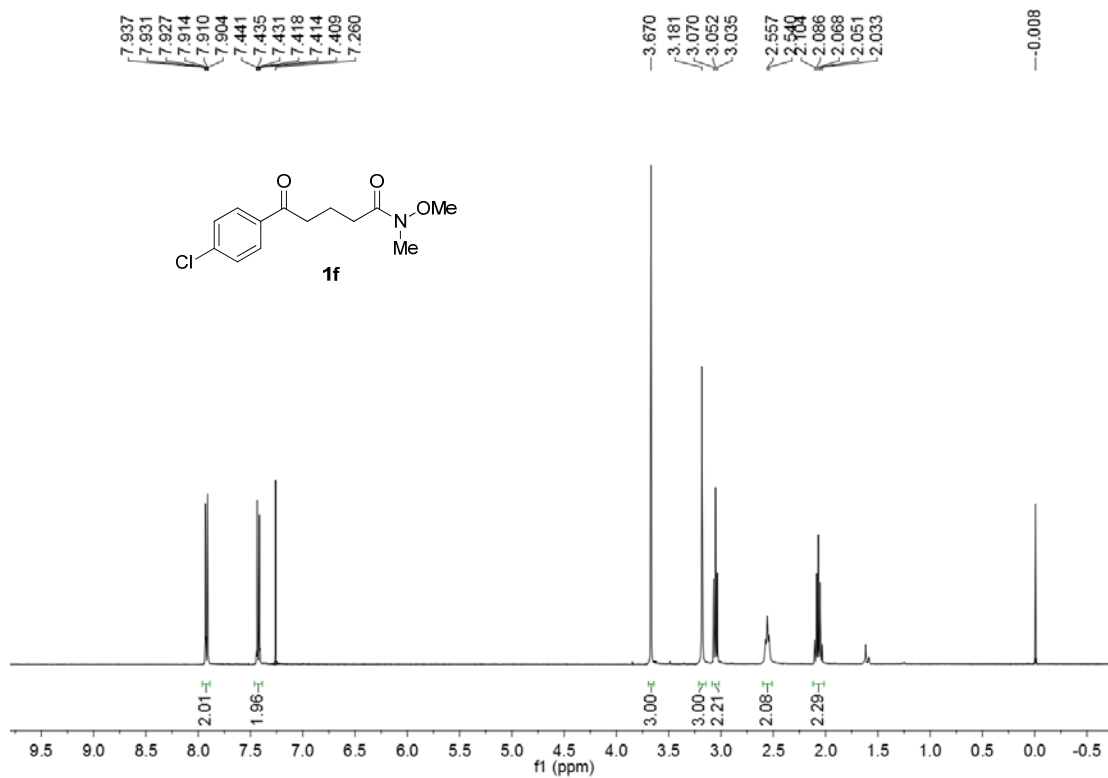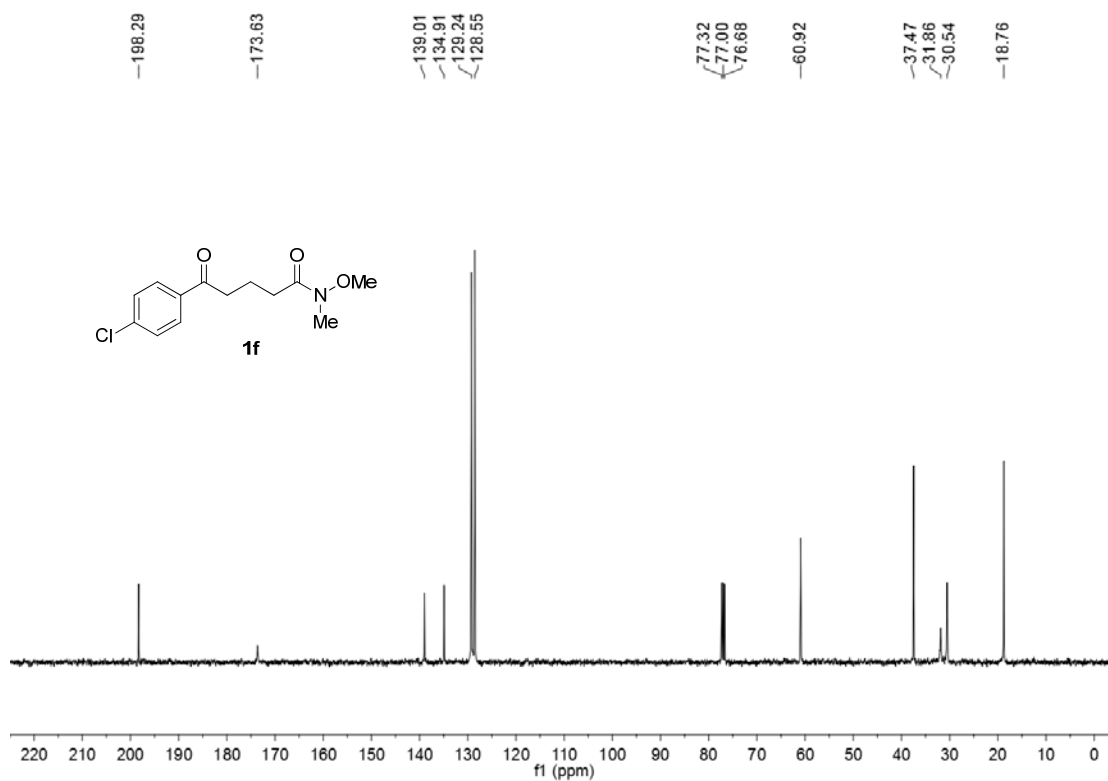

***N*-Methoxy-*N*-methyl-5-oxo-5-(*m*-tolyl)pentanamide, (1g)**

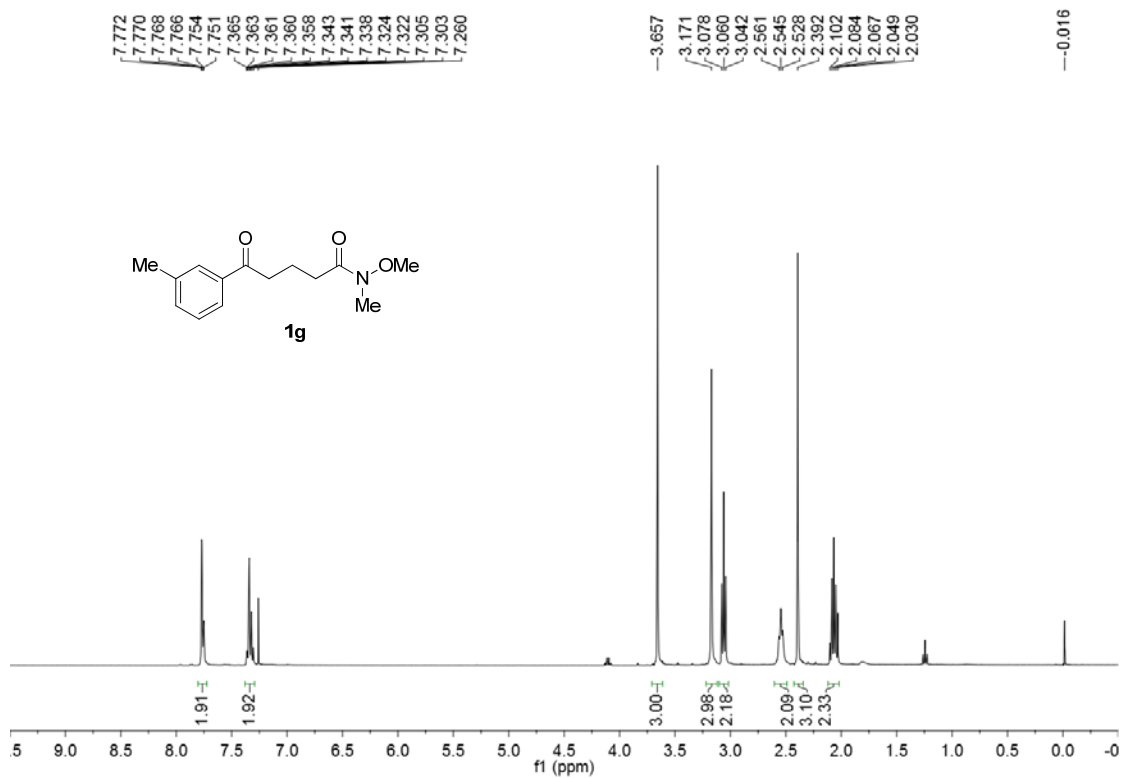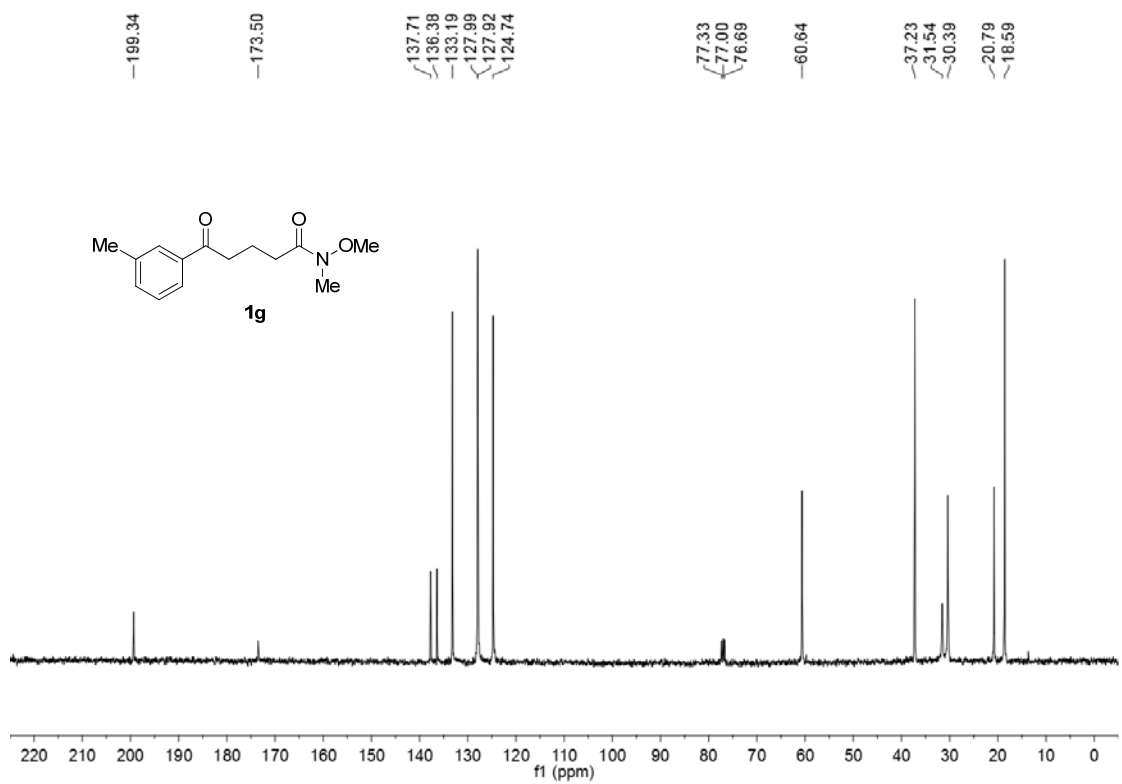



***N*-Methoxy-*N*-methyl-5-oxo-5-(*o*-tolyl)pentanamide, (1h)**

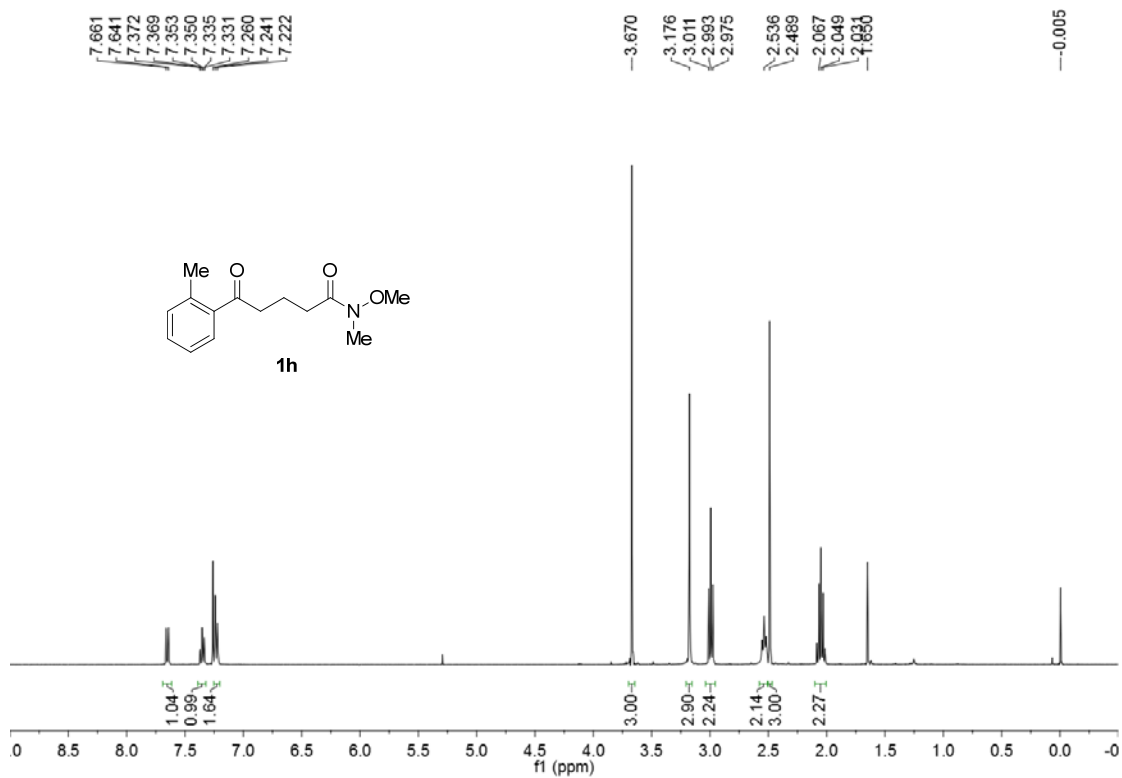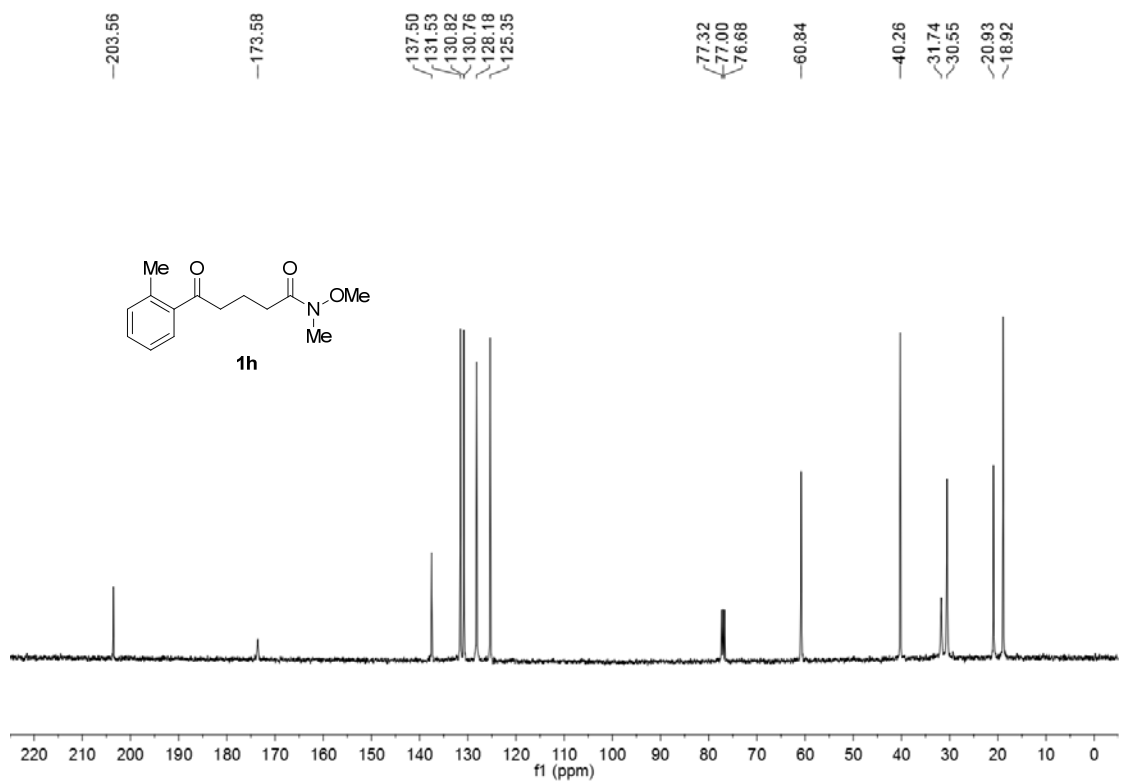

***N*-Methoxy-*N*-methyl-5-(2-methoxyphenyl)-5-oxopentanamide, (1i)**

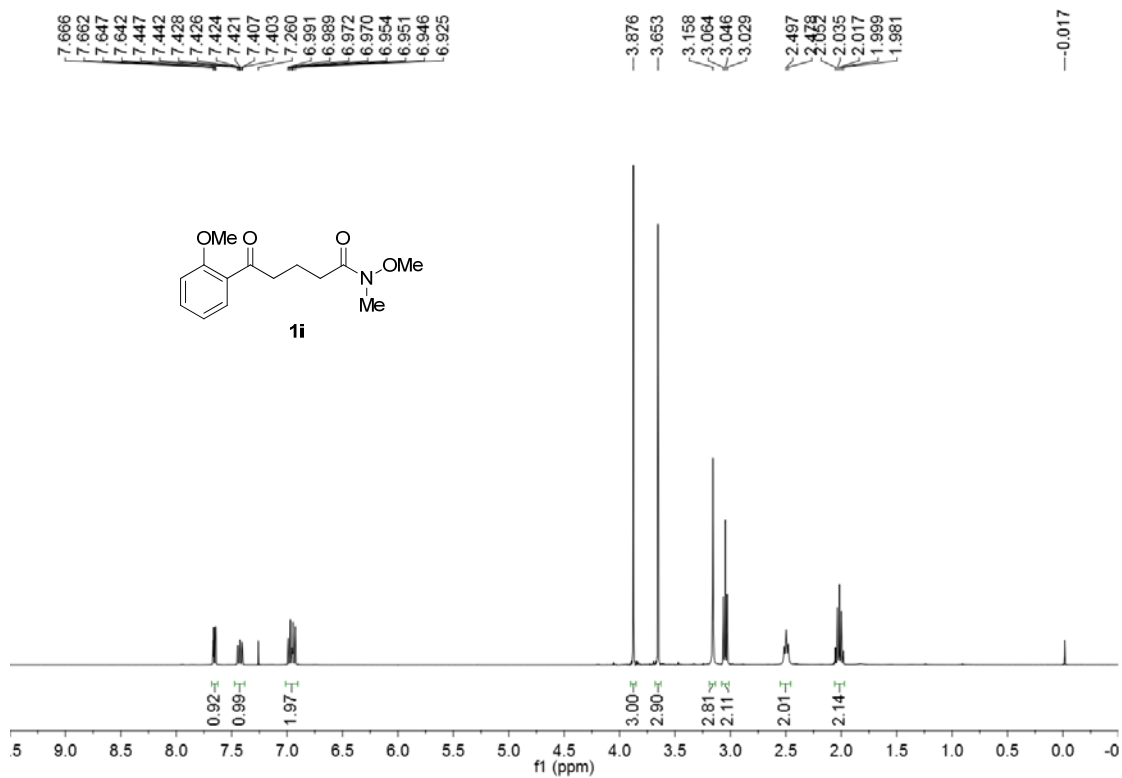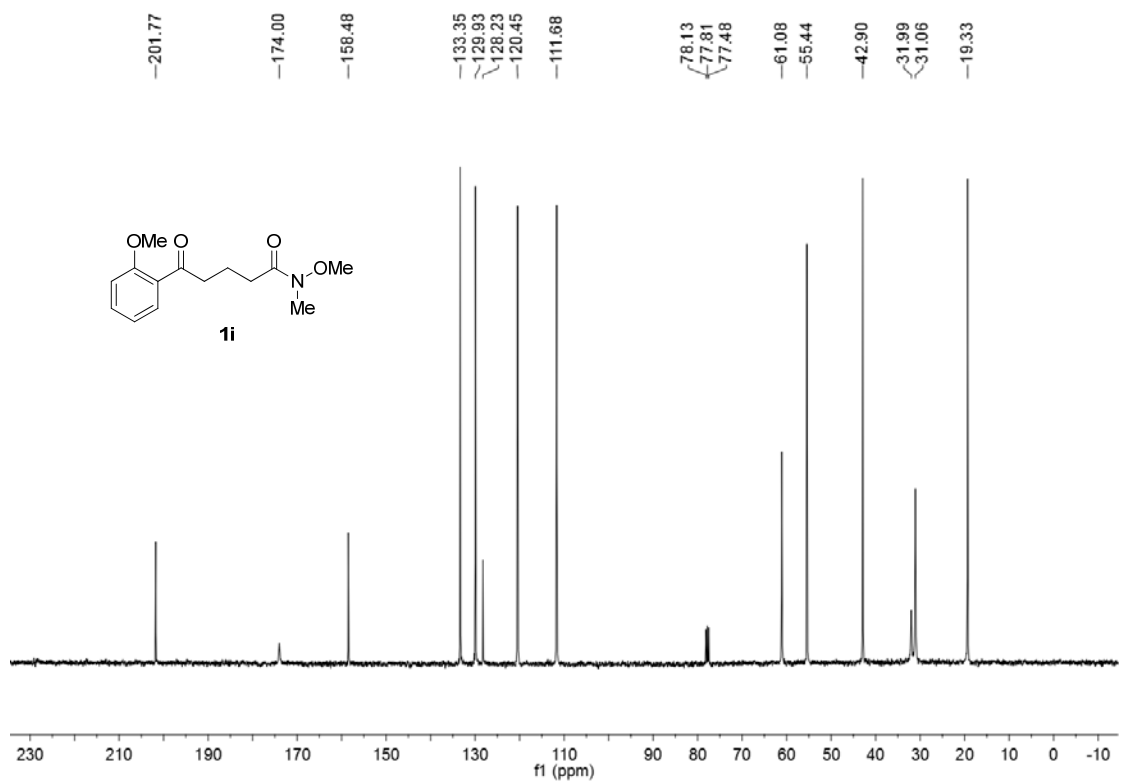

***N*-Methoxy-*N*-methyl-5-(naphthalen-2-yl)-5-oxopentanamide, (1j)**

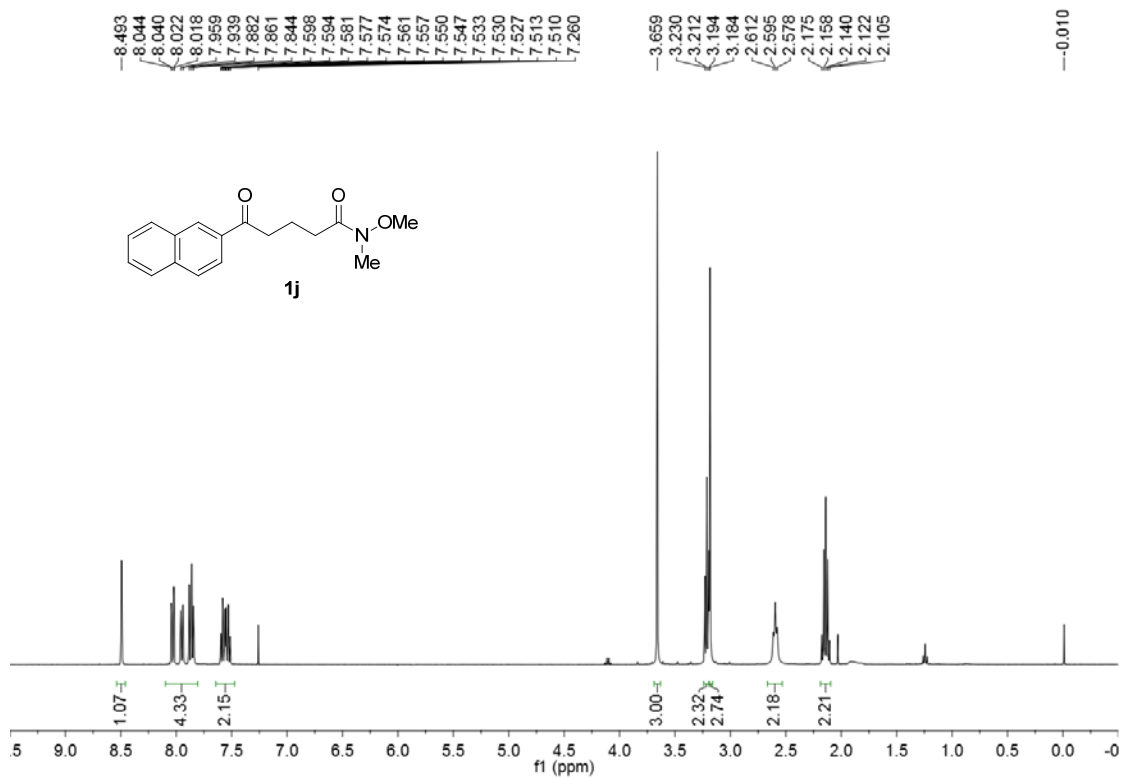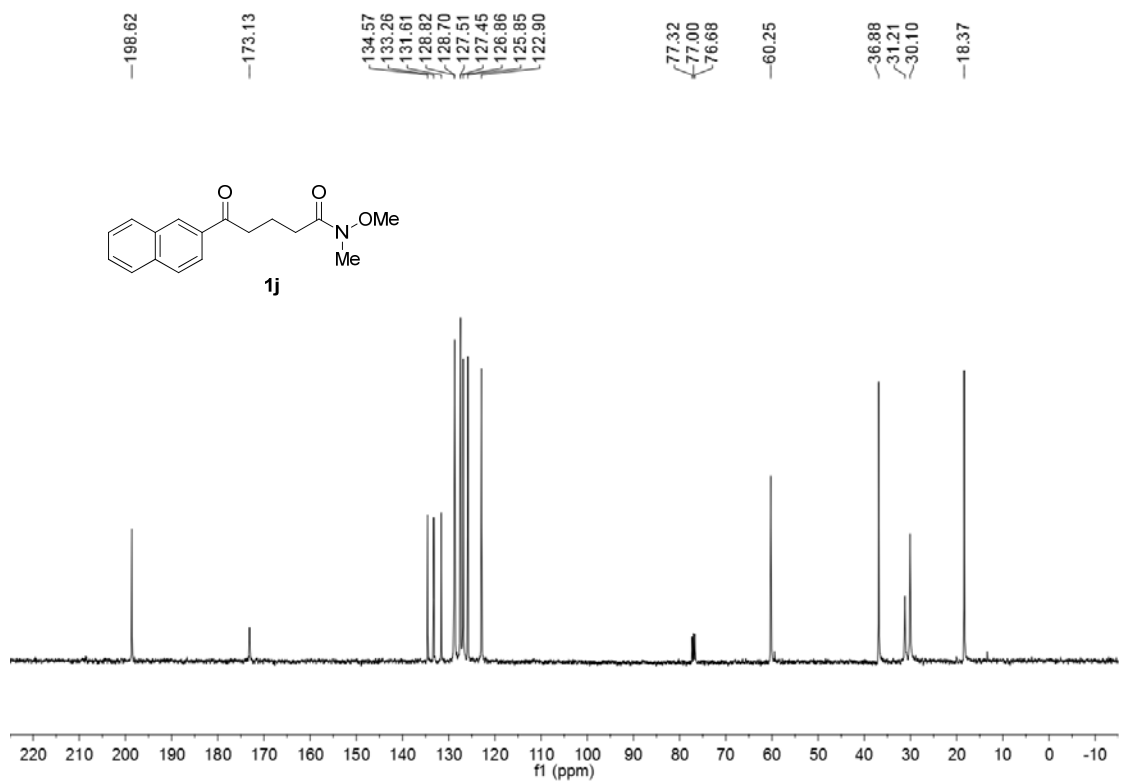

***N*-Methoxy-*N*-methyl-5-oxo-5-(thiophen-2-yl)pentanamide, (1k)**

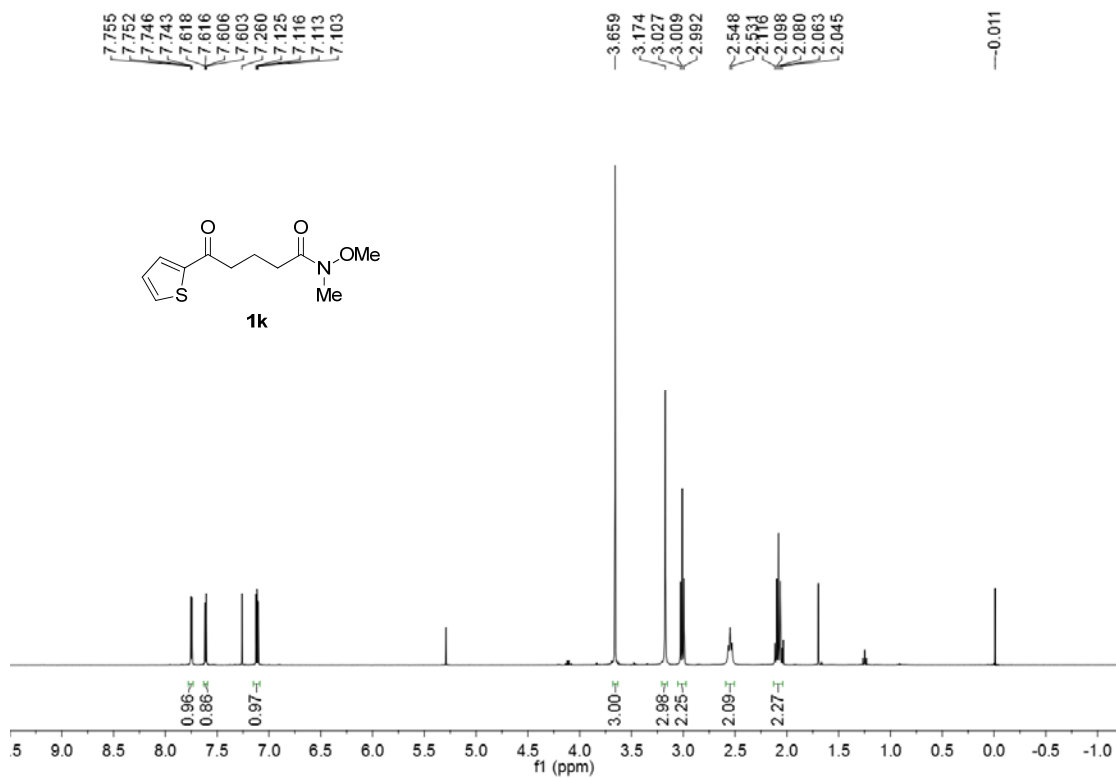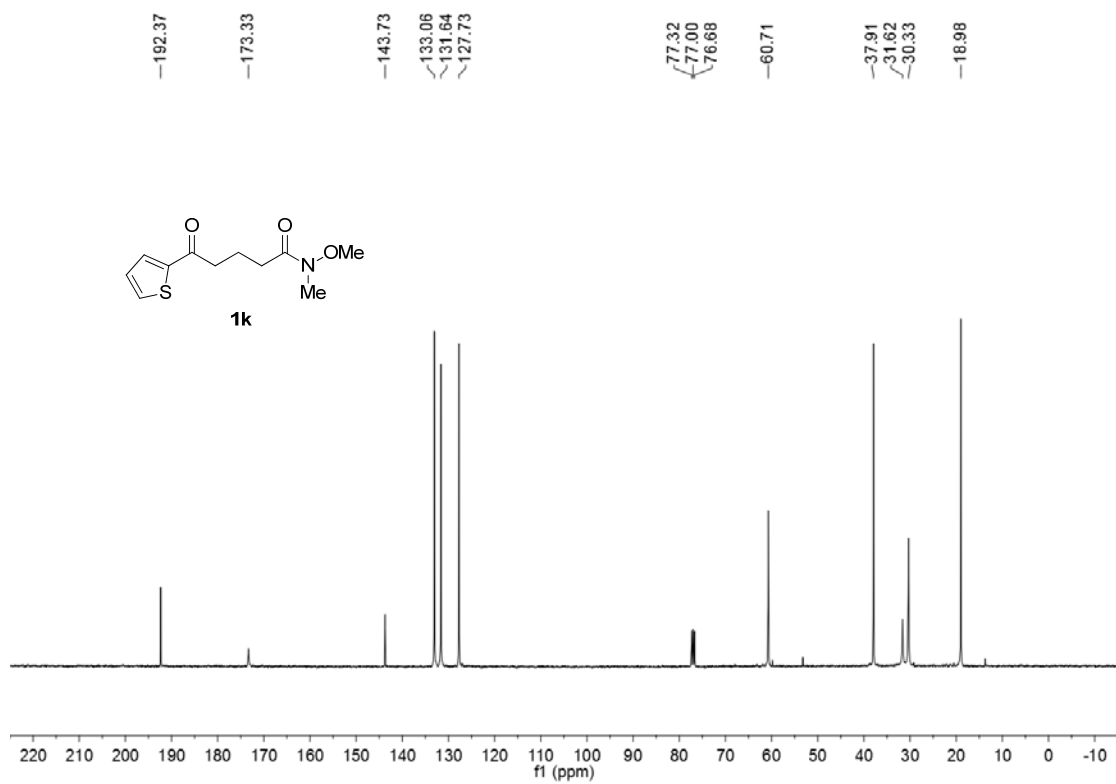

*N*-Methoxy-*N*-methyl-5-oxoheptanamide, (11)

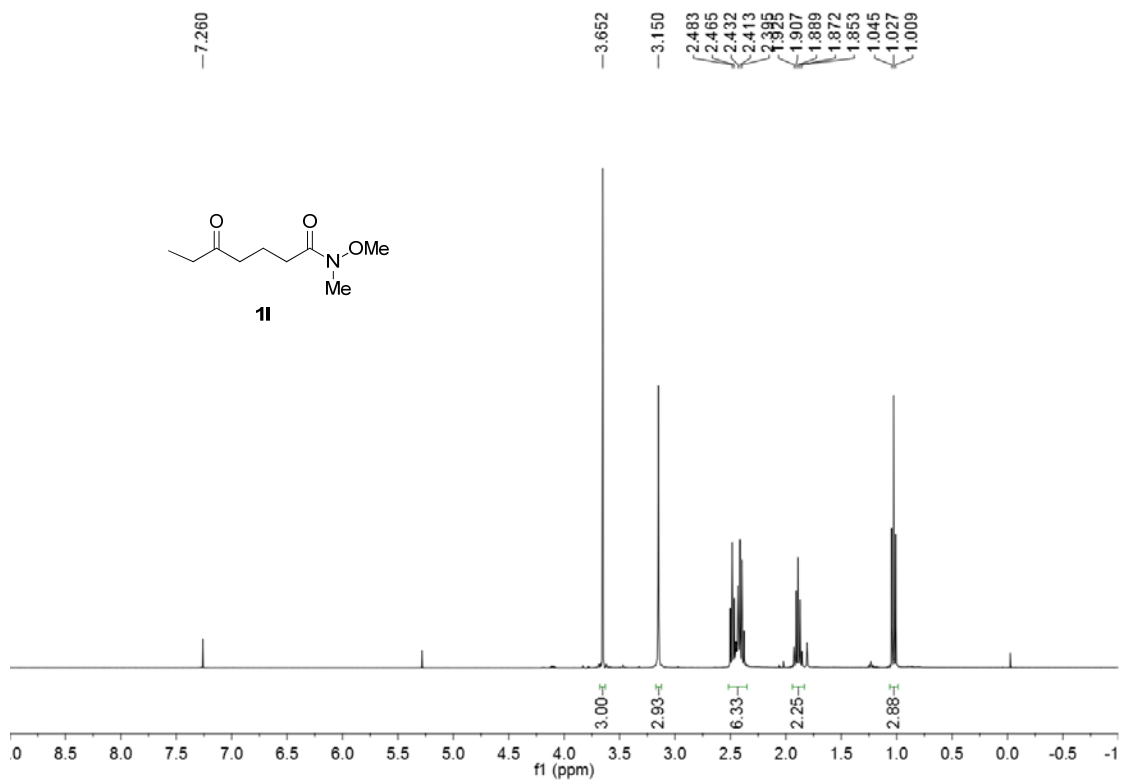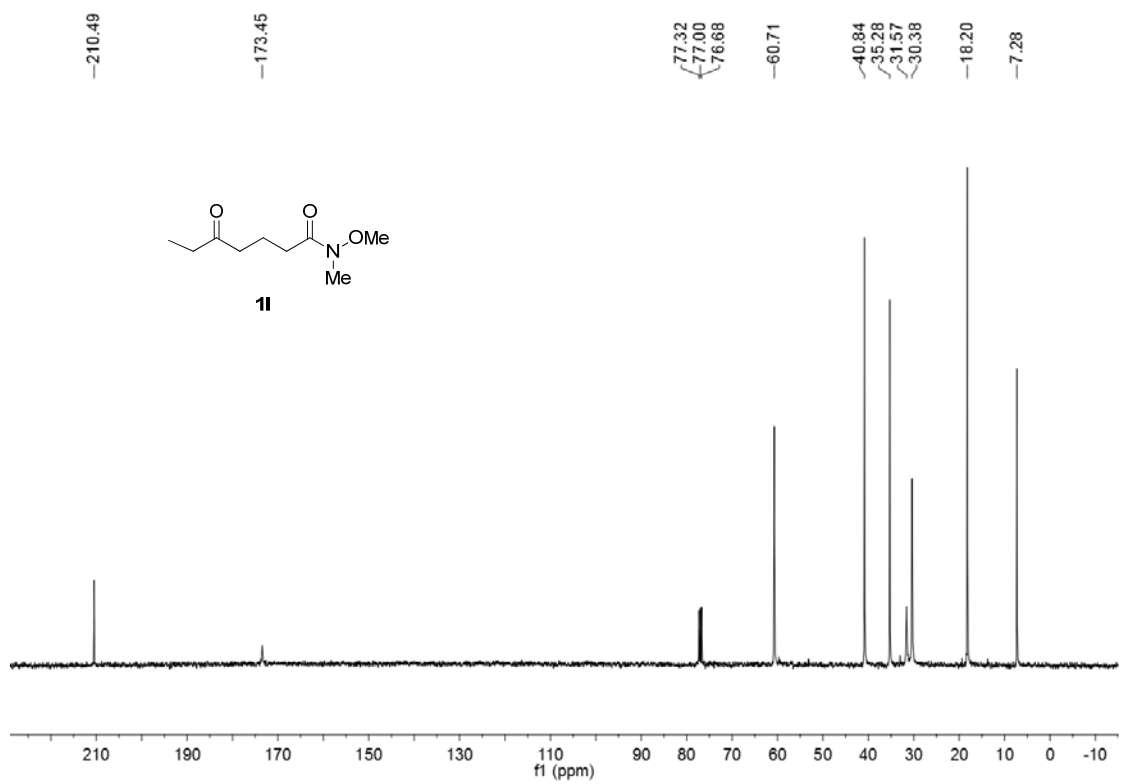

***N*-Methoxy-*N*-methyl-5-oxo-6-phenylhexanamide, (1m)**

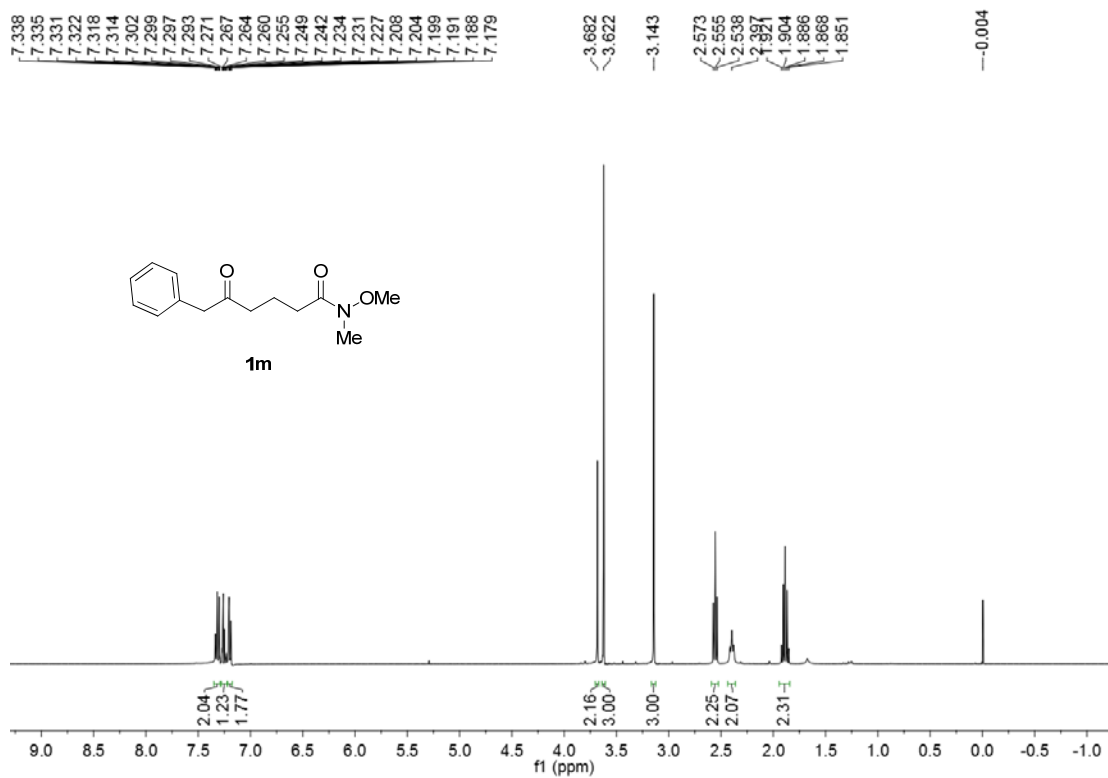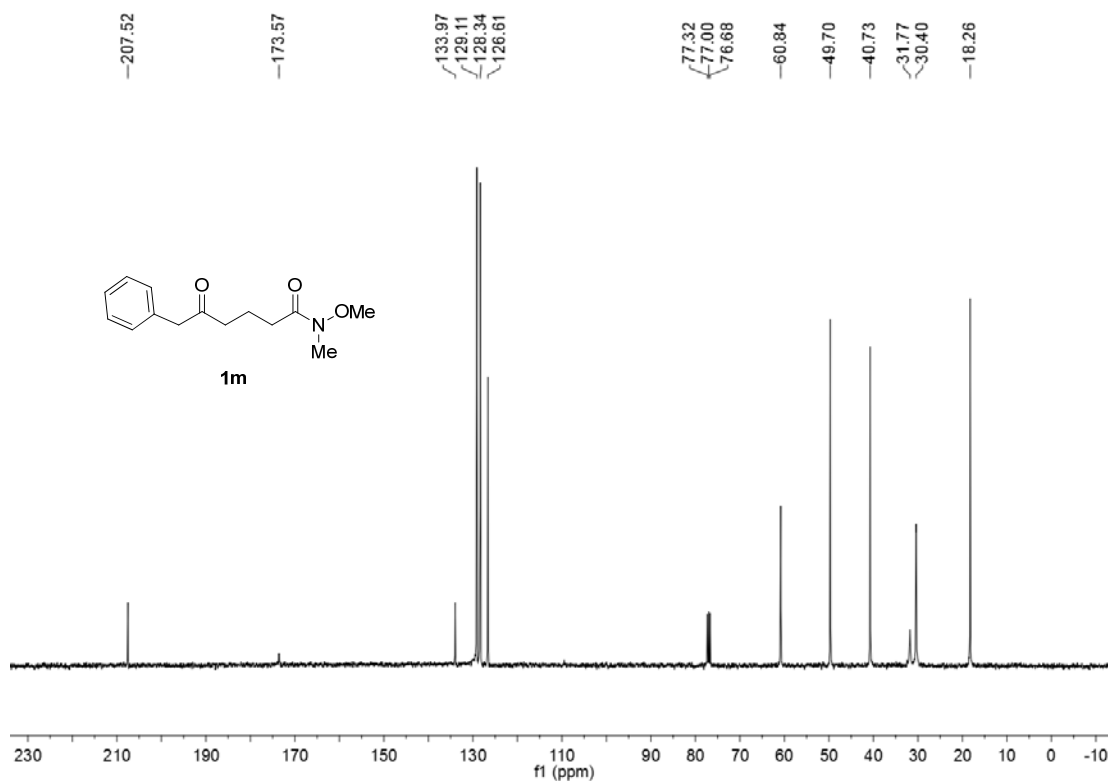

**5-Hydroxy-N-methoxy-N-methyl-5-phenylpentanamide, (2a)**

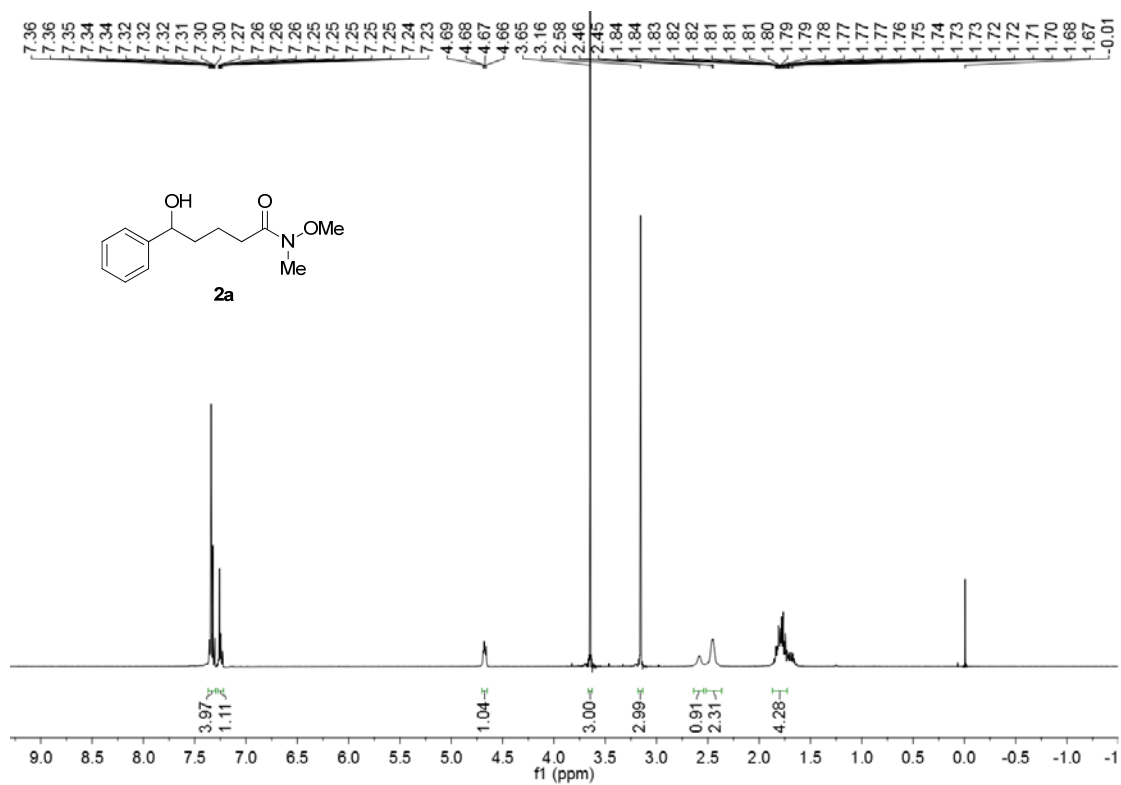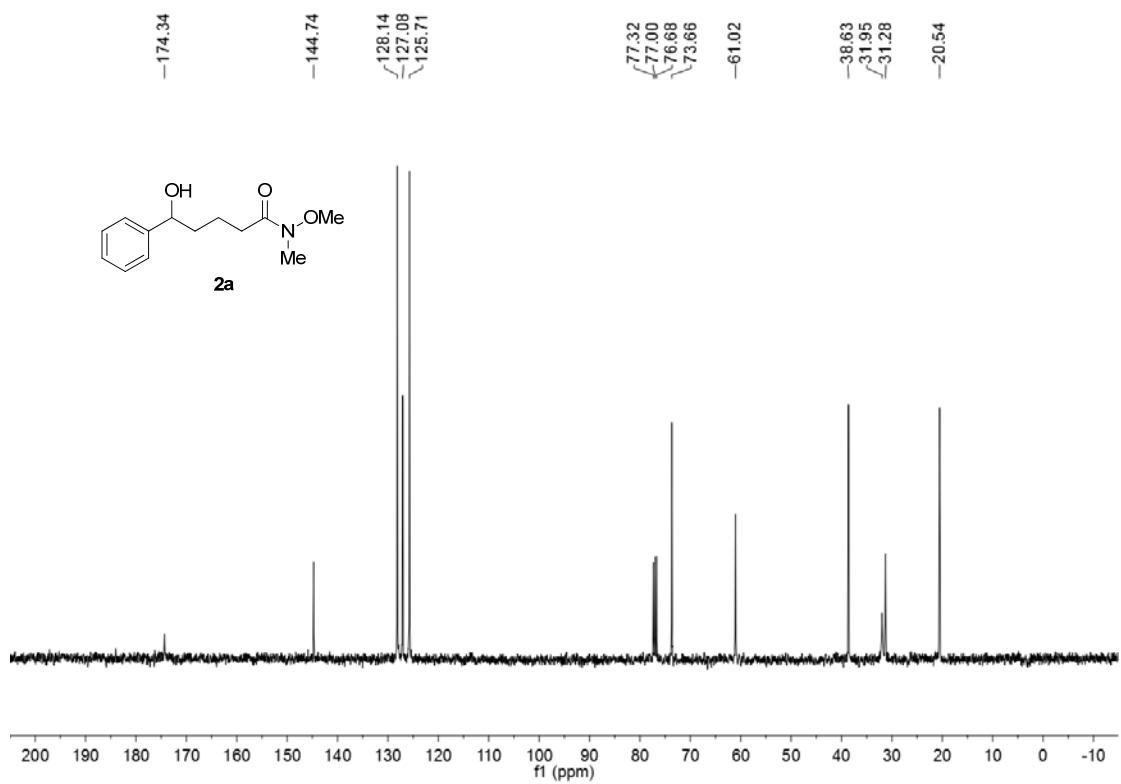

**5-Hydroxy-N-methoxy-N-methyl-5-(p-tolyl)pentanamide, (2b)**

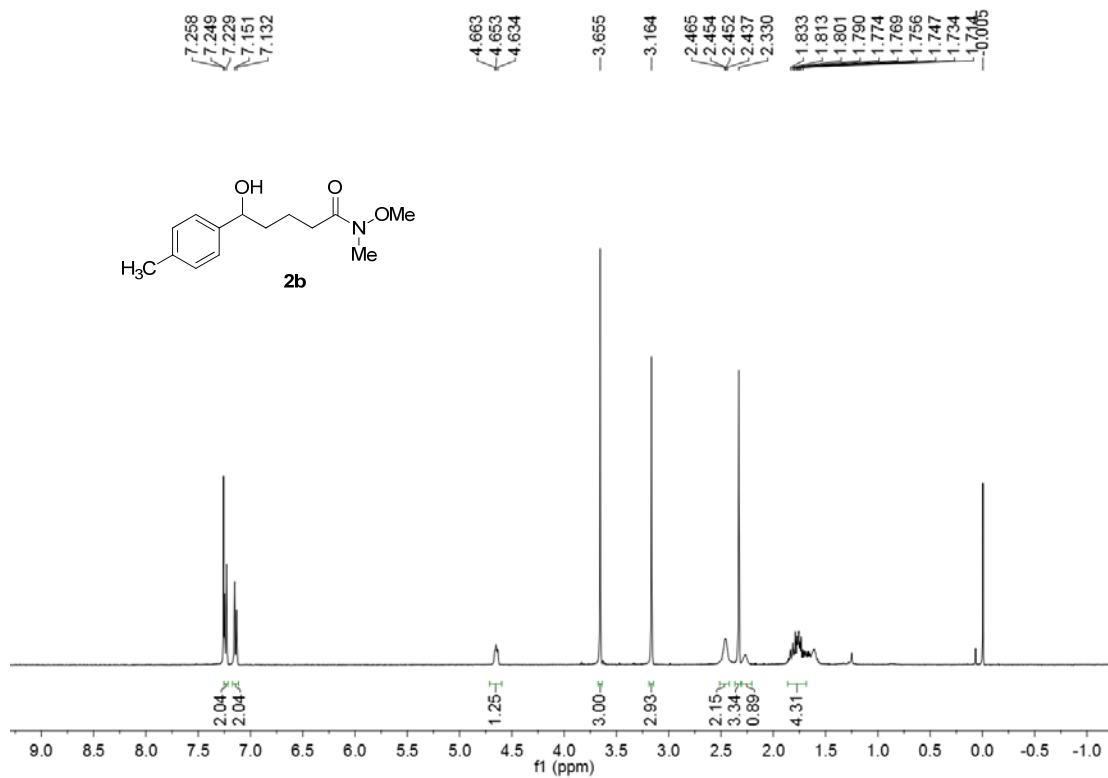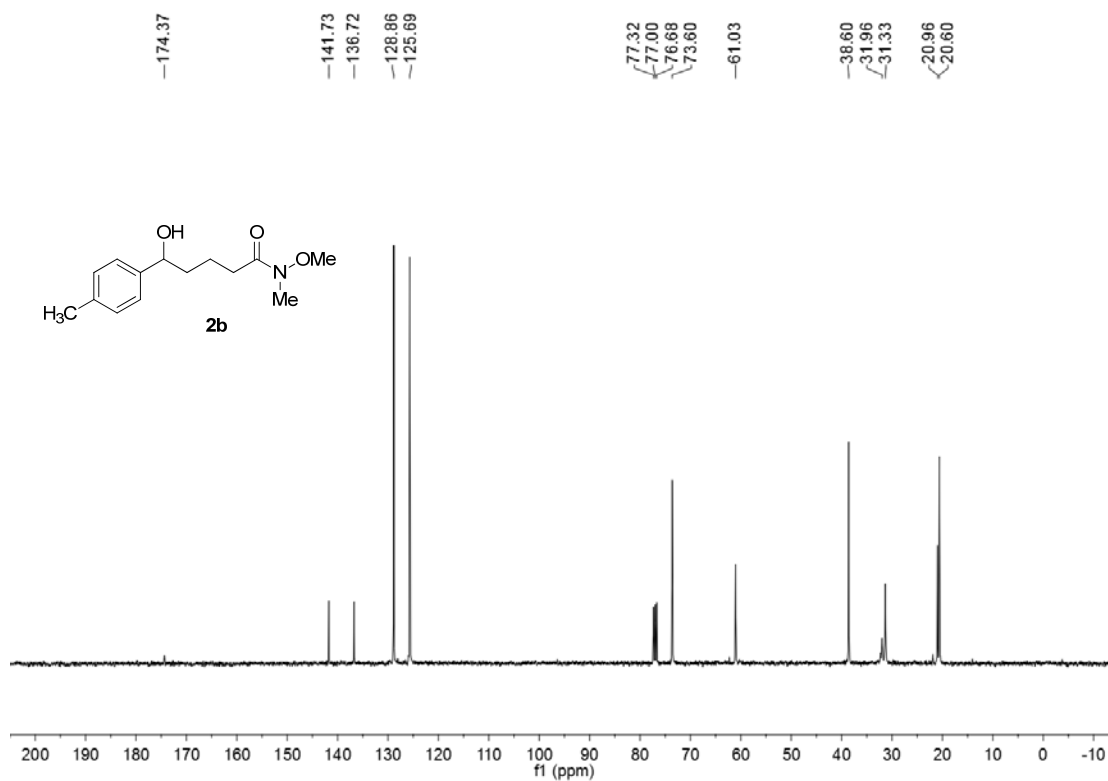



5-Hydroxy-N-methoxy-N-methyl-5-(4-methoxyphenyl)pentanamide, (2c)

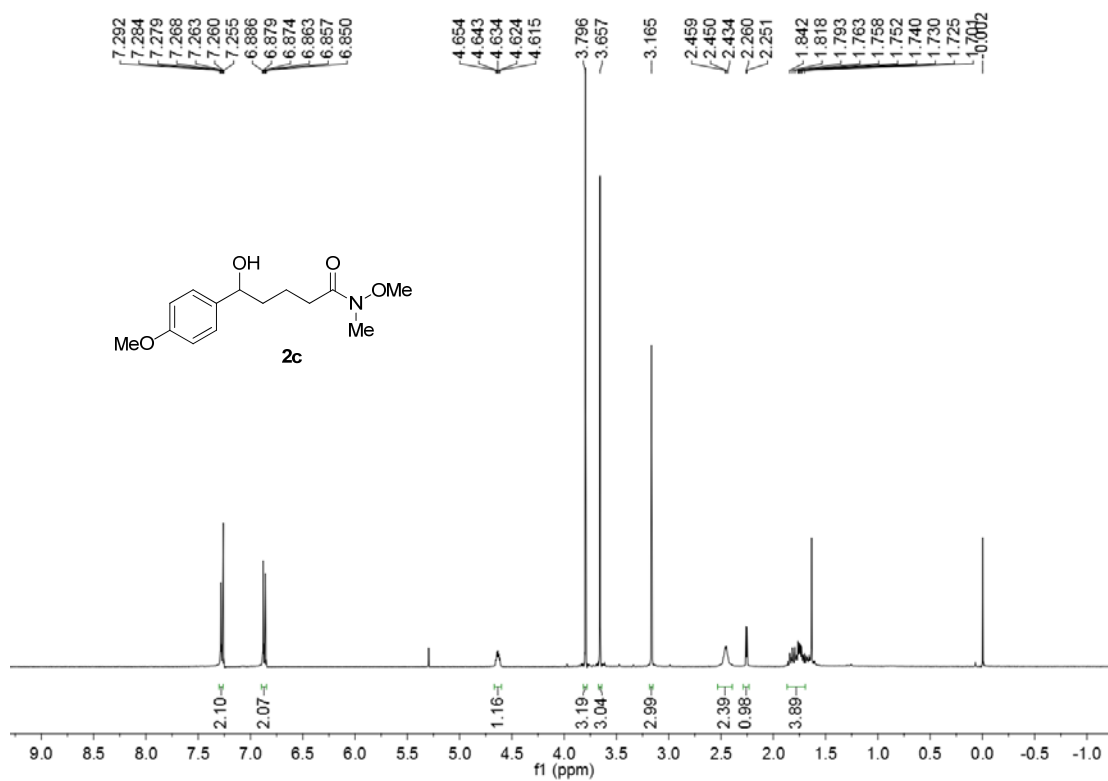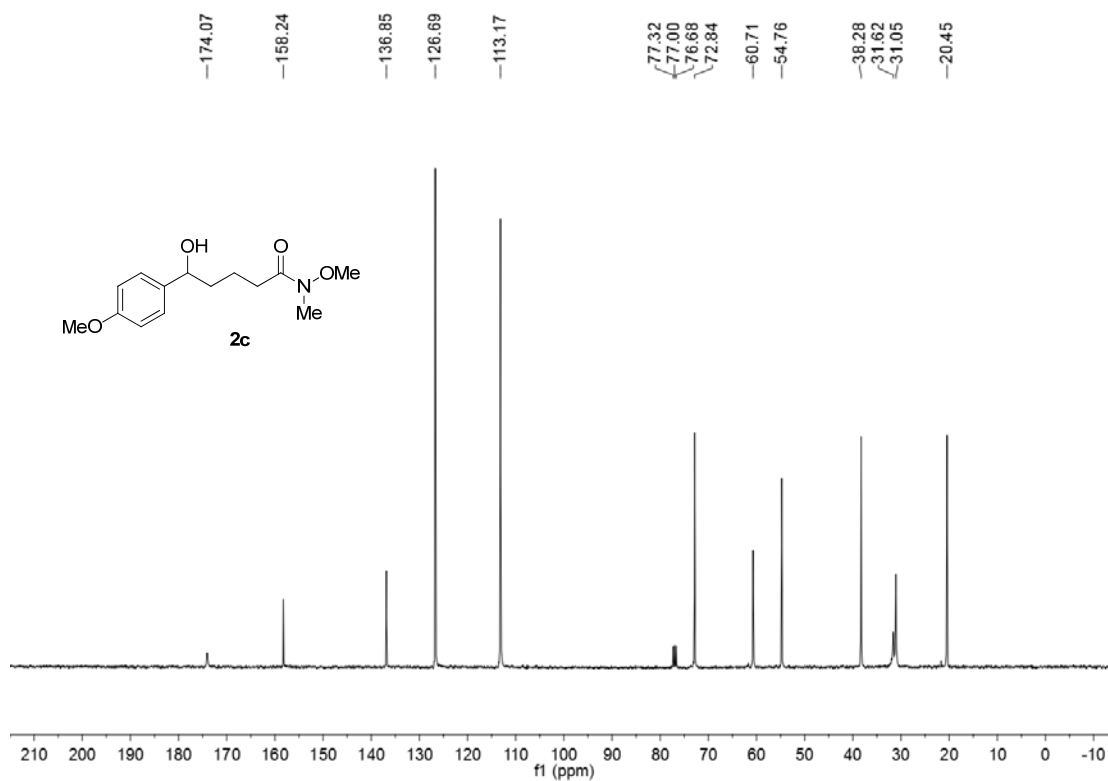

### 5-Hydroxy-N-methoxy-N-methyl-5-(4-(trifluoromethyl)phenyl)pentanamide, (2d)

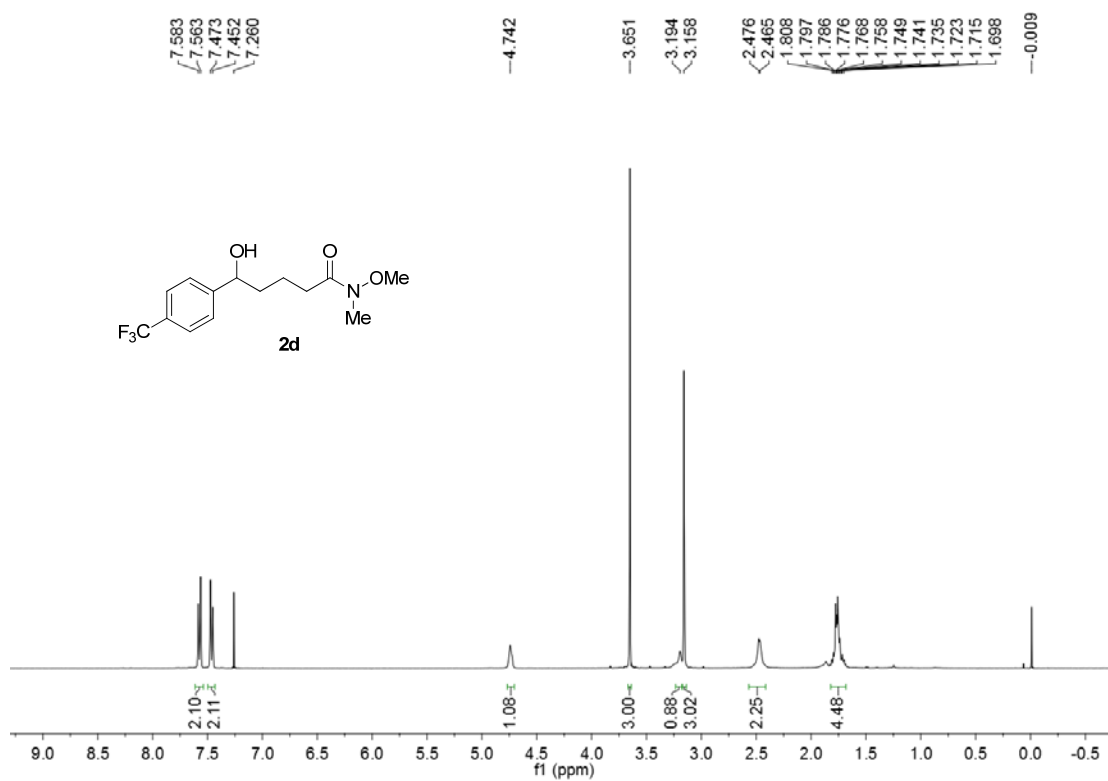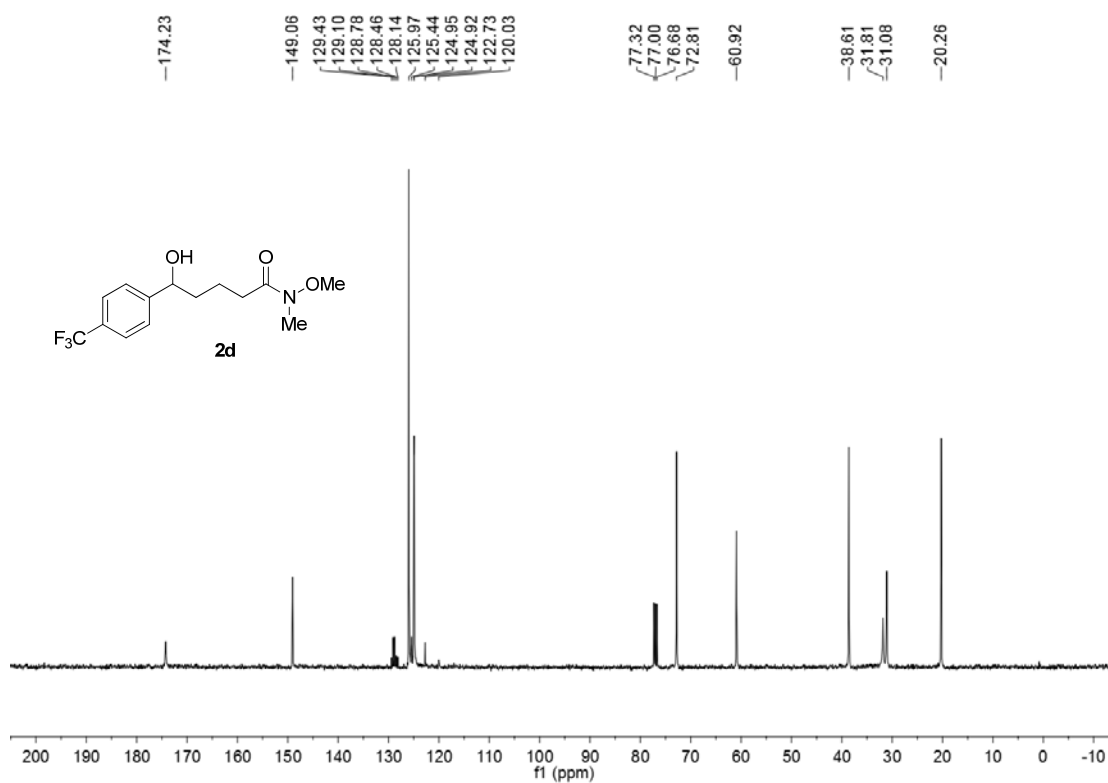

5-Hydroxy-N-methoxy-N-methyl-5-(4-fluorophenyl)pentanamide, (2e)

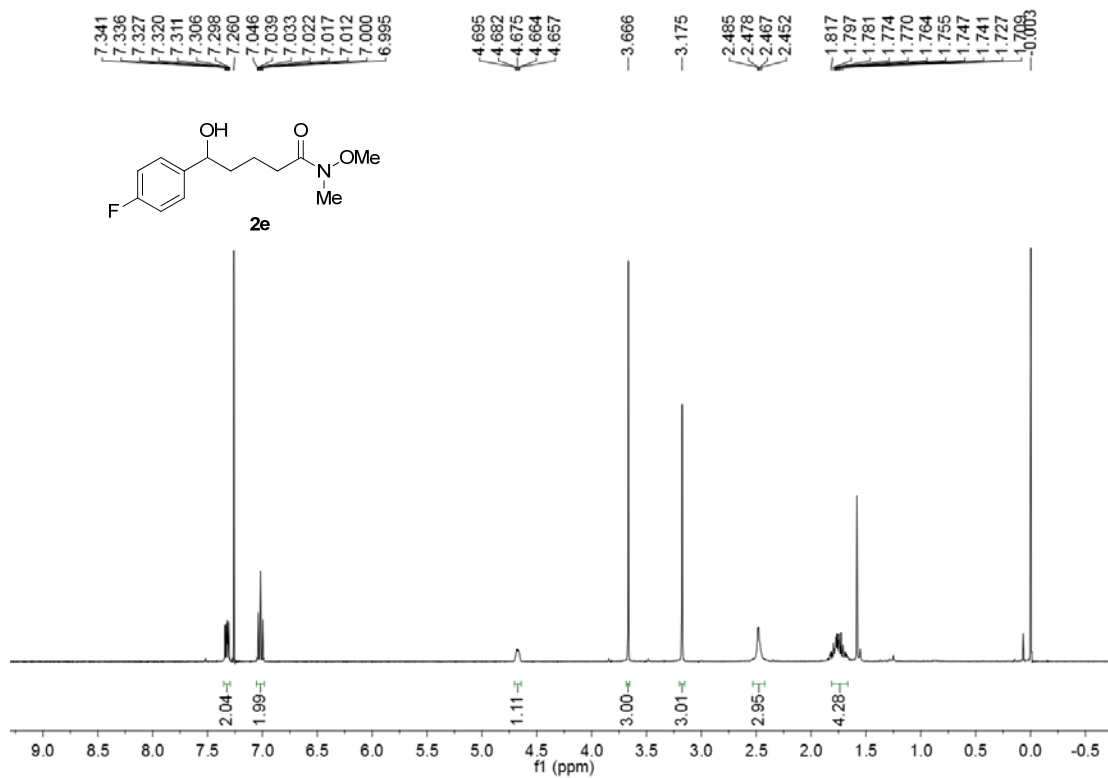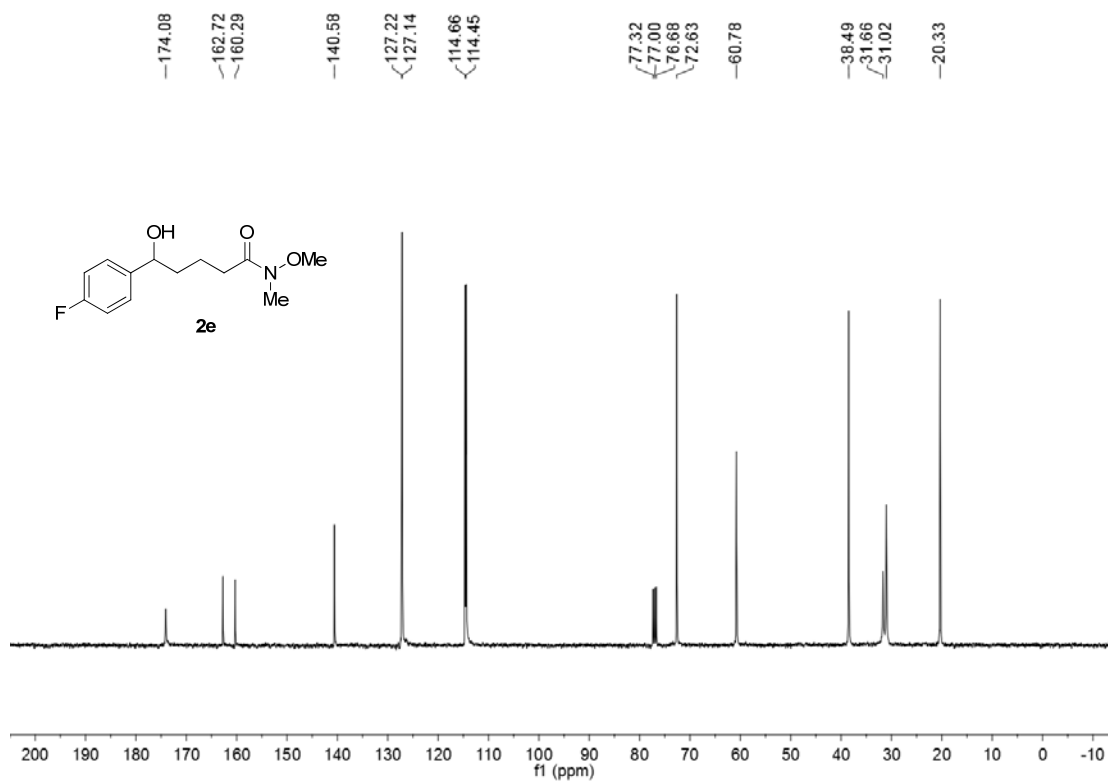

**1-(4-Fluorophenyl)pentane-1,5-diol, (2e')**

7.317  
7.304  
7.286  
7.282  
7.260  
7.043  
7.039  
7.022  
7.005  
7.000  
4.680  
4.665  
4.661  
4.647  
3.639  
3.623  
3.607  
3.607  
1.824  
1.816  
1.803  
1.796  
1.790  
1.784  
1.777  
1.771  
1.758  
1.735  
1.721  
1.709  
1.696  
1.696  
1.687  
1.682  
1.676  
1.662  
1.648  
1.621  
1.613  
1.604  
1.598  
1.588  
1.582  
1.565  
1.549  
1.537  
1.524  
1.512  
1.505  
1.500  
1.490  
1.477  
1.467  
1.381  
1.367  
1.360  
1.353  
1.347  
1.341  
1.327

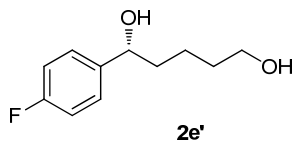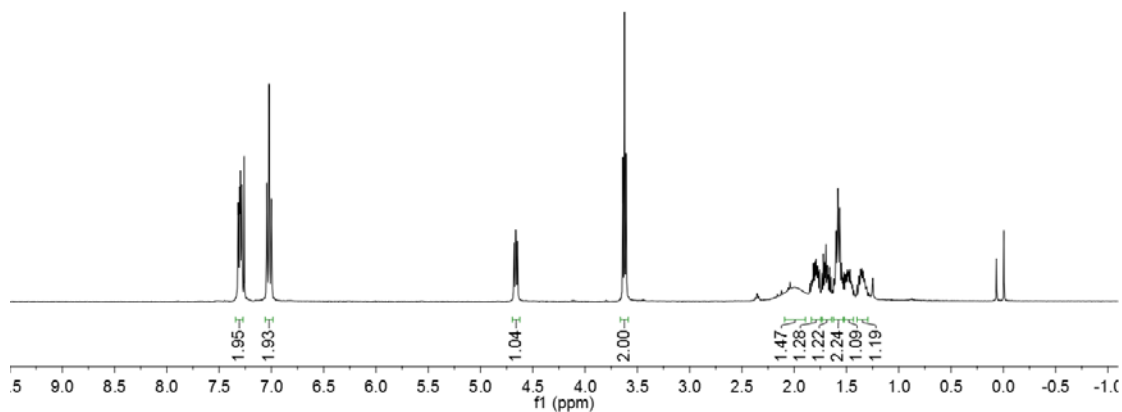

-163.490  
-141.650  
-127.638  
-127.558  
-115.496  
-115.286  
-77.478  
-77.160  
-76.843  
-73.979  
-62.773  
-38.921  
-32.481  
-22.105

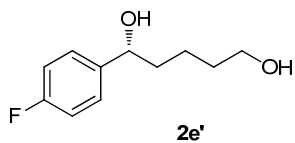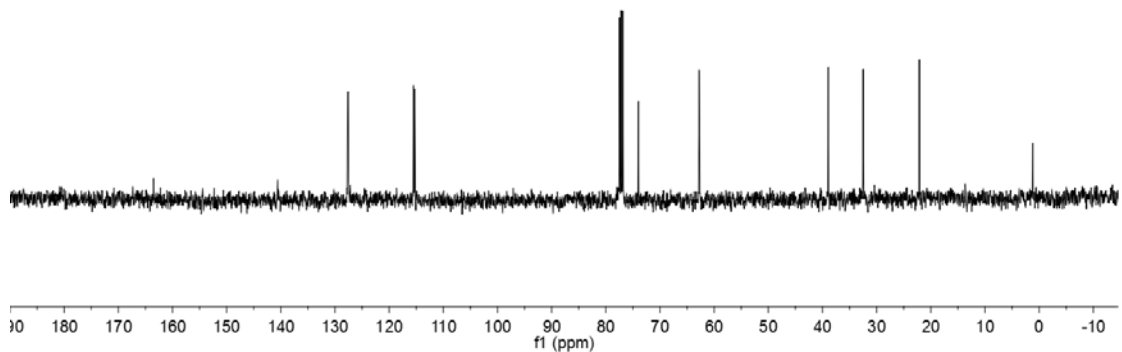

5-Hydroxy-N-methoxy-N-methyl-5-(4-chlorophenyl)pentanamide, (2f)

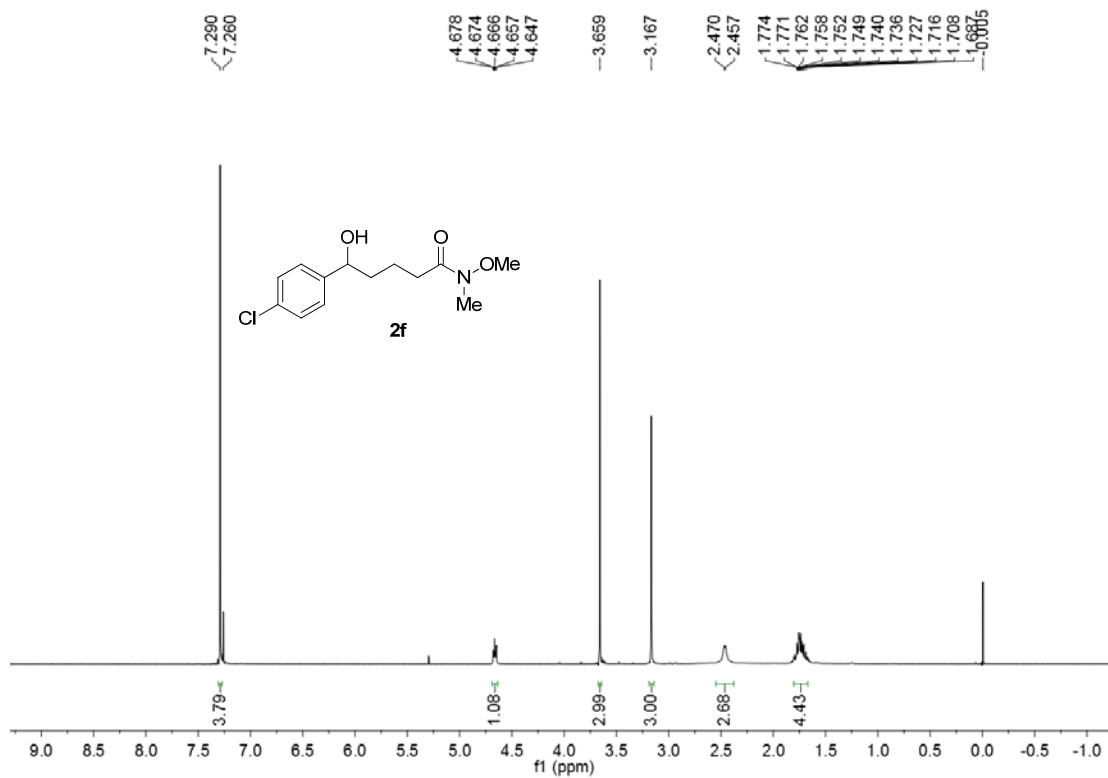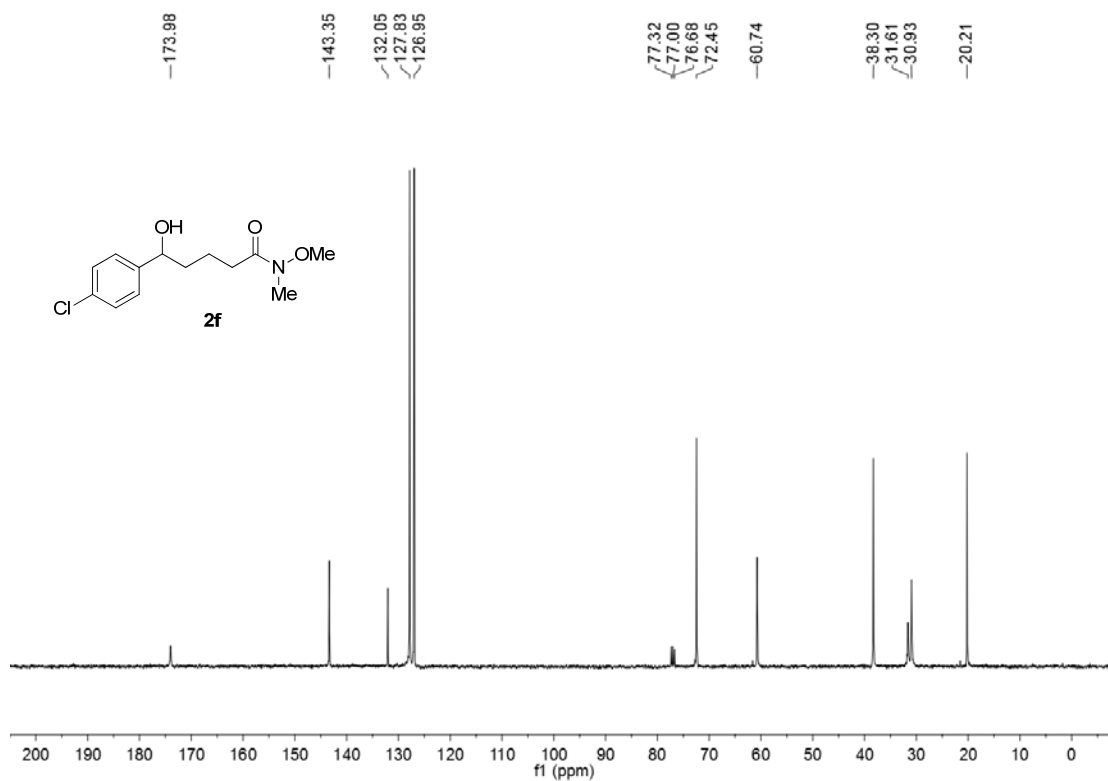

**5-Hydroxy-N-methoxy-N-methyl-5-(m-tolyl)pentanamide, (2g)**

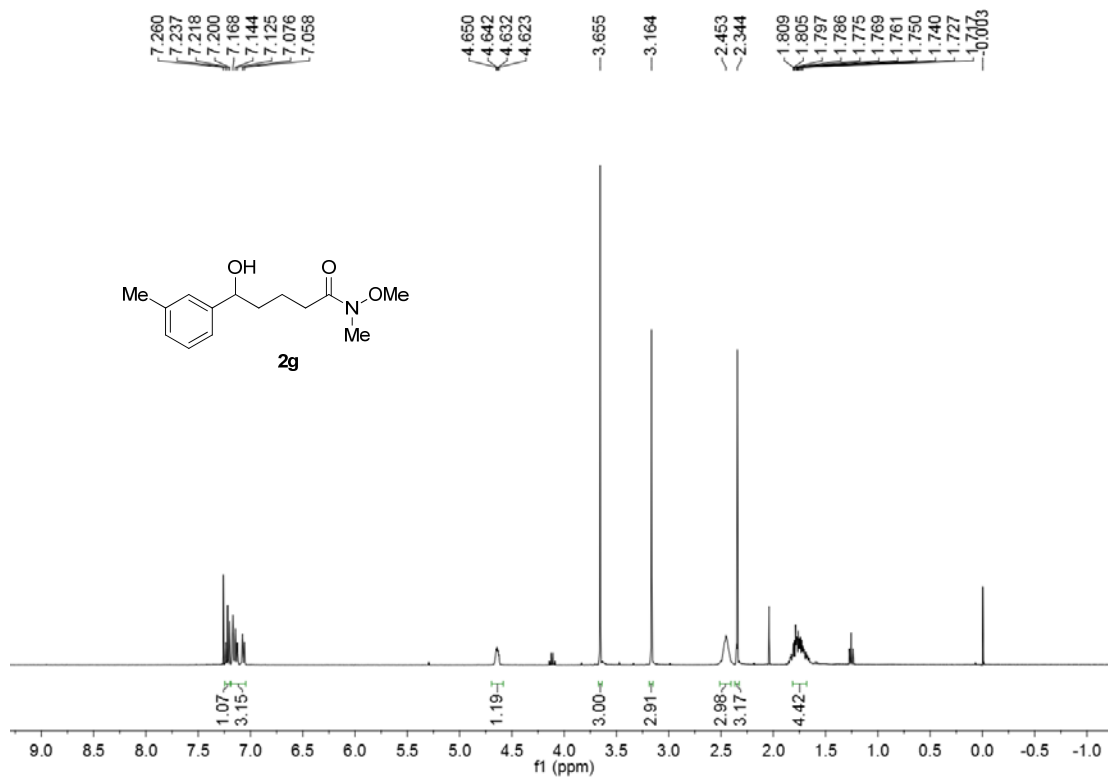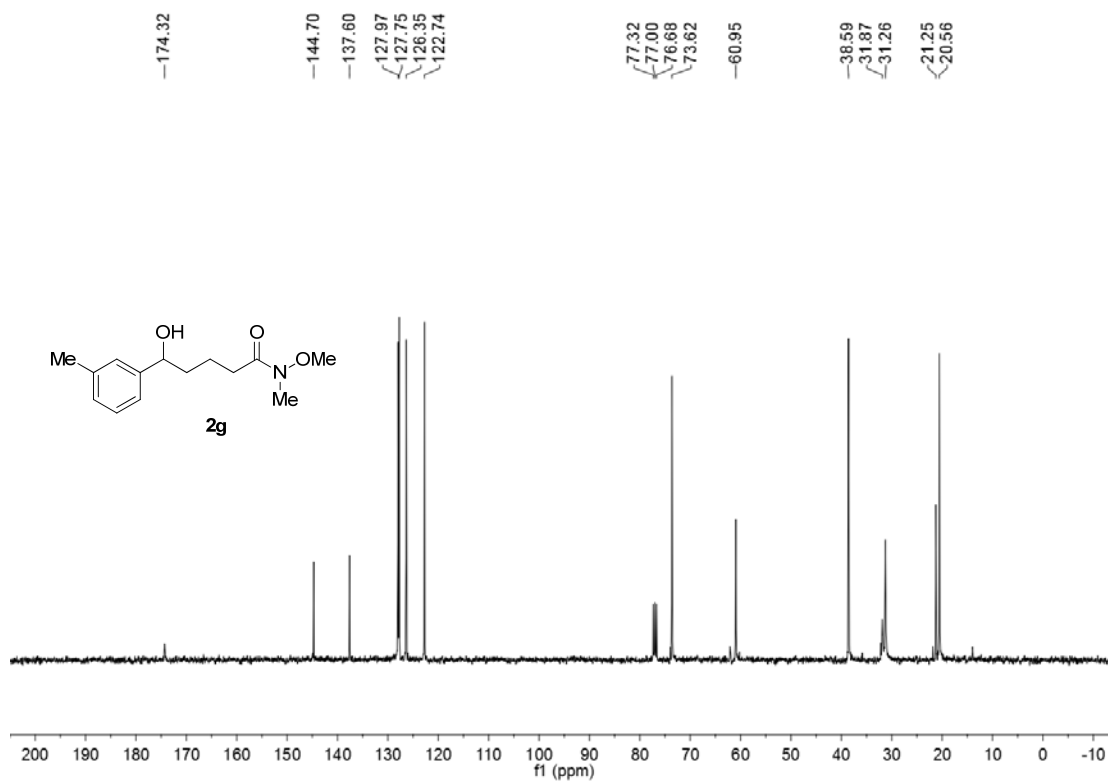

**5-Hydroxy-N-methoxy-N-methyl-5-(o-tolyl)pentanamide, (2h)**

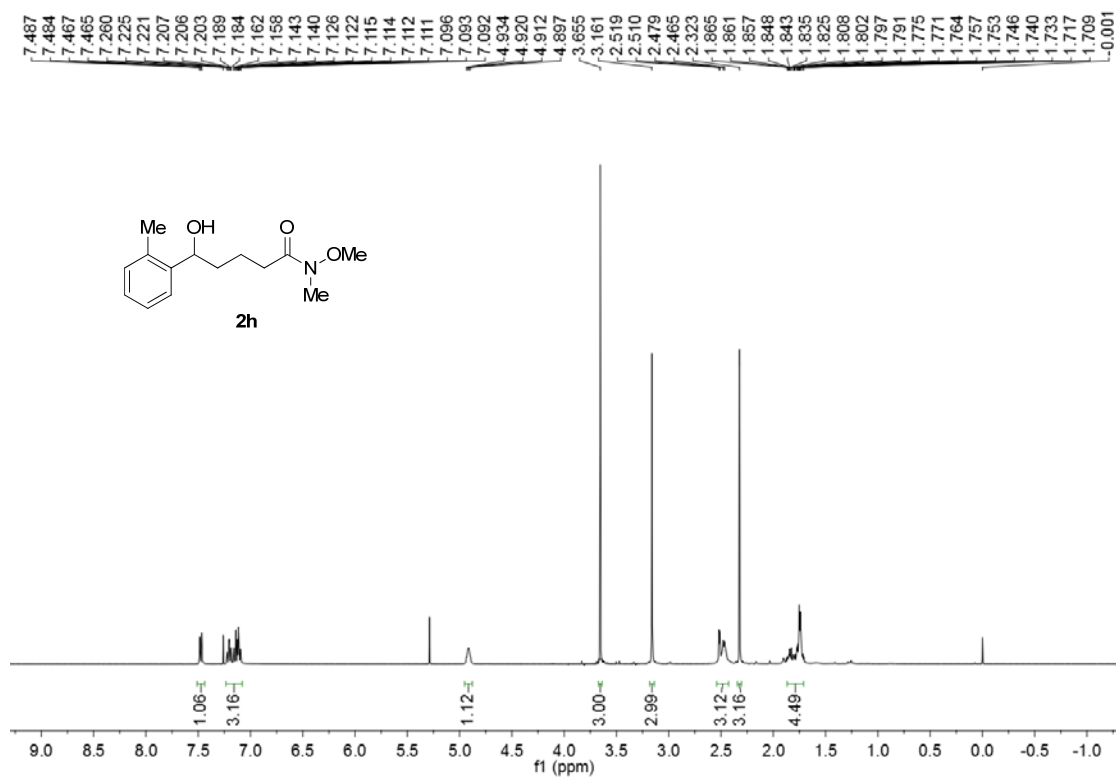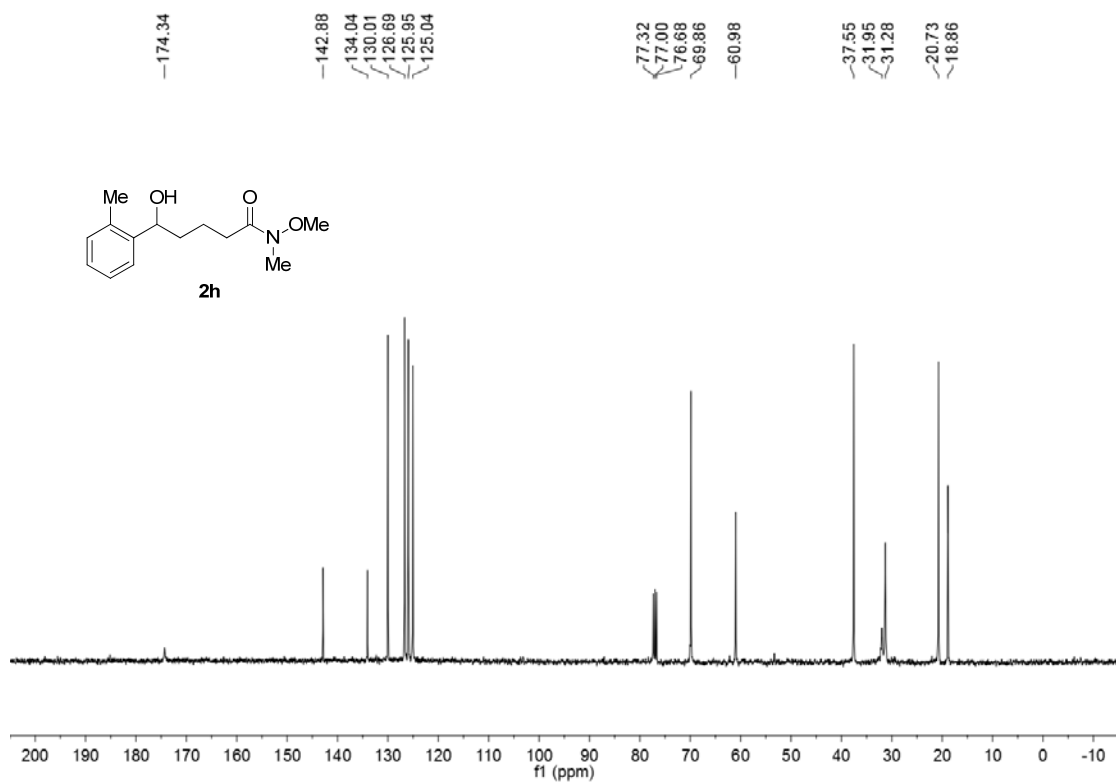

5-Hydroxy-N-methoxy-N-methyl-5-(2-methoxyphenyl)pentanamide, (2i)

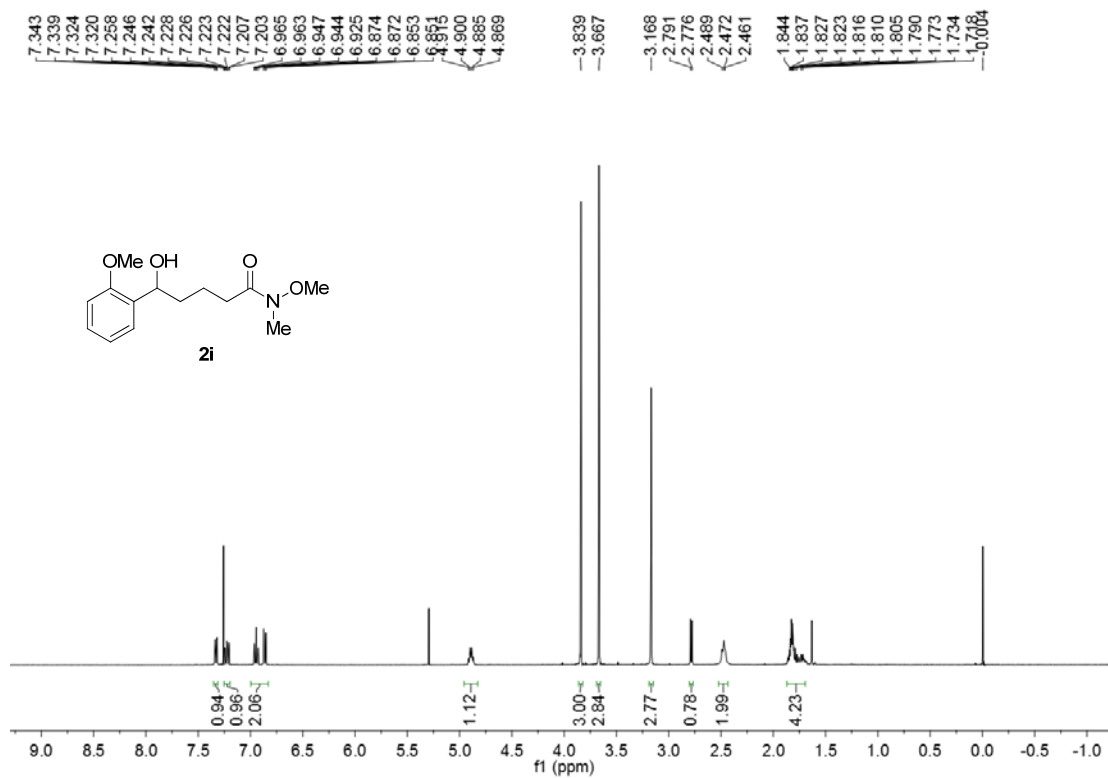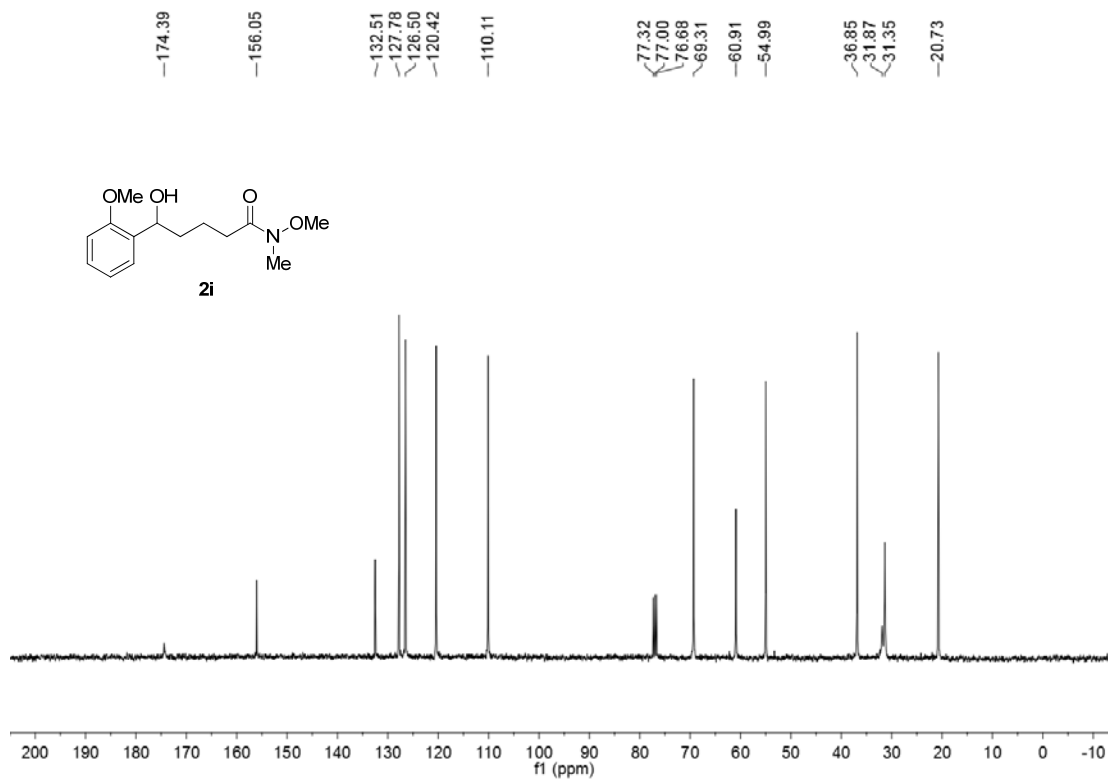



5-Hydroxy-N-methoxy-N-methyl-5-(naphthalen-2-yl)pentanamide, (2j)

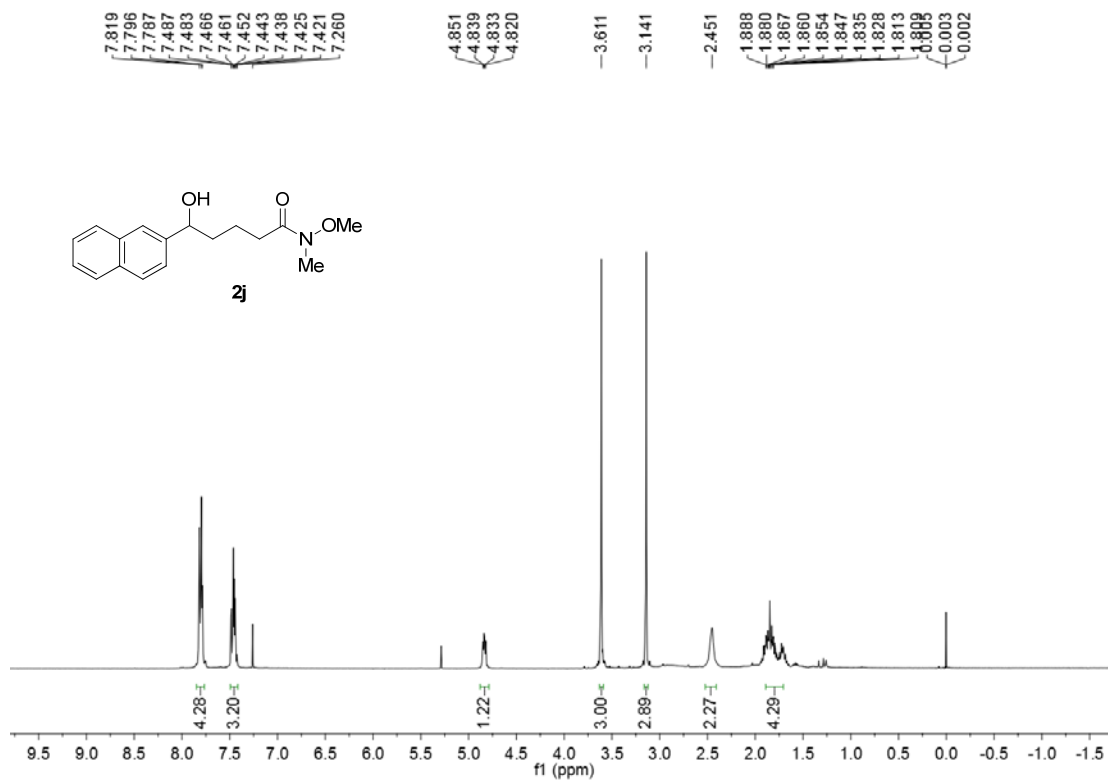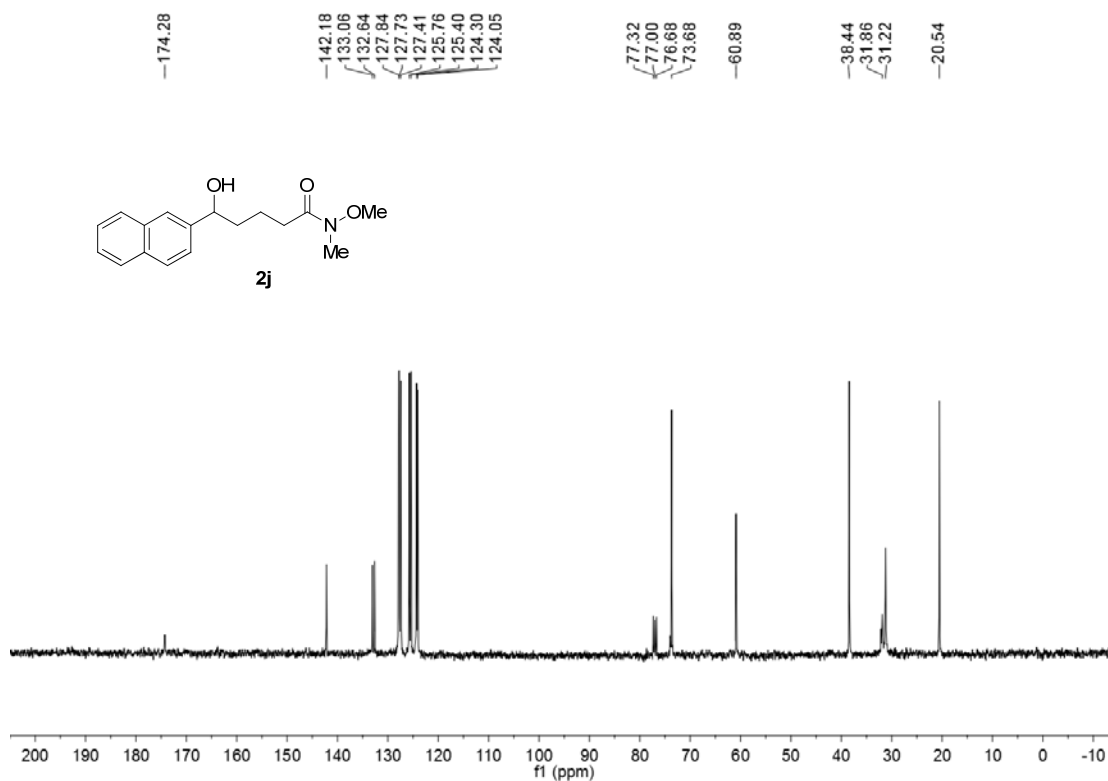

5-Hydroxy-N-methoxy-N-methyl-5-(thiophen-2-yl)pentanamide, (2k)

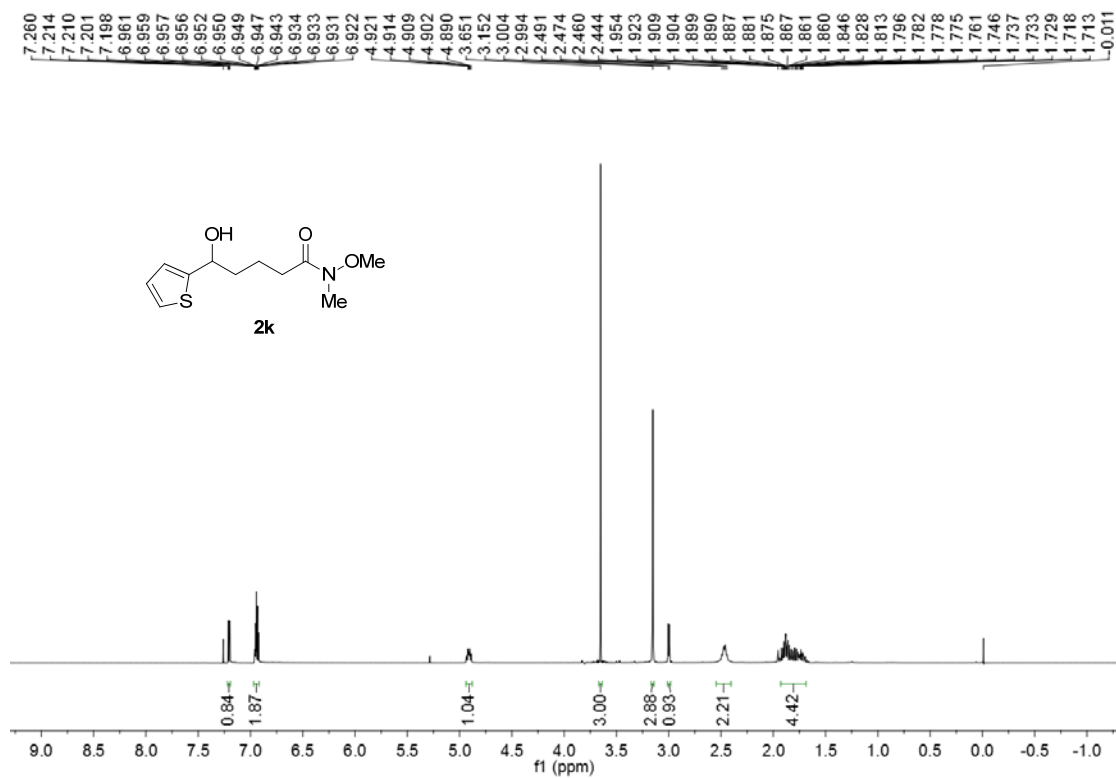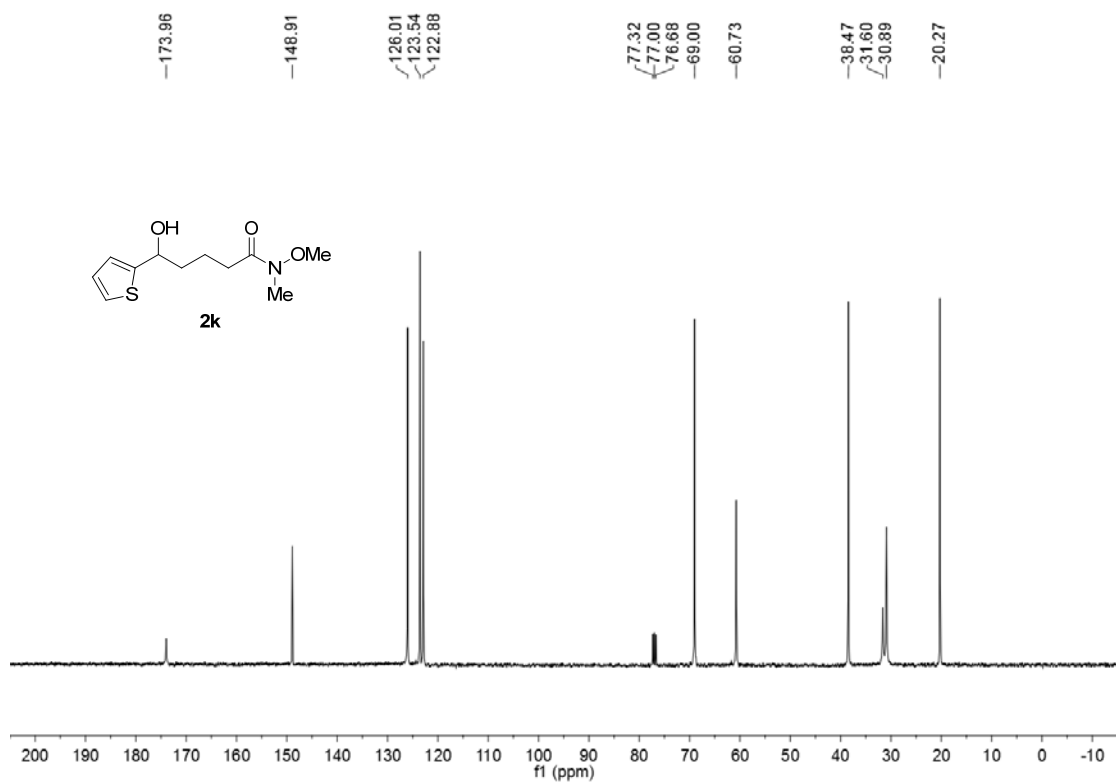

5-Hydroxy-N-methoxy-N-methylheptanamide, (2I)

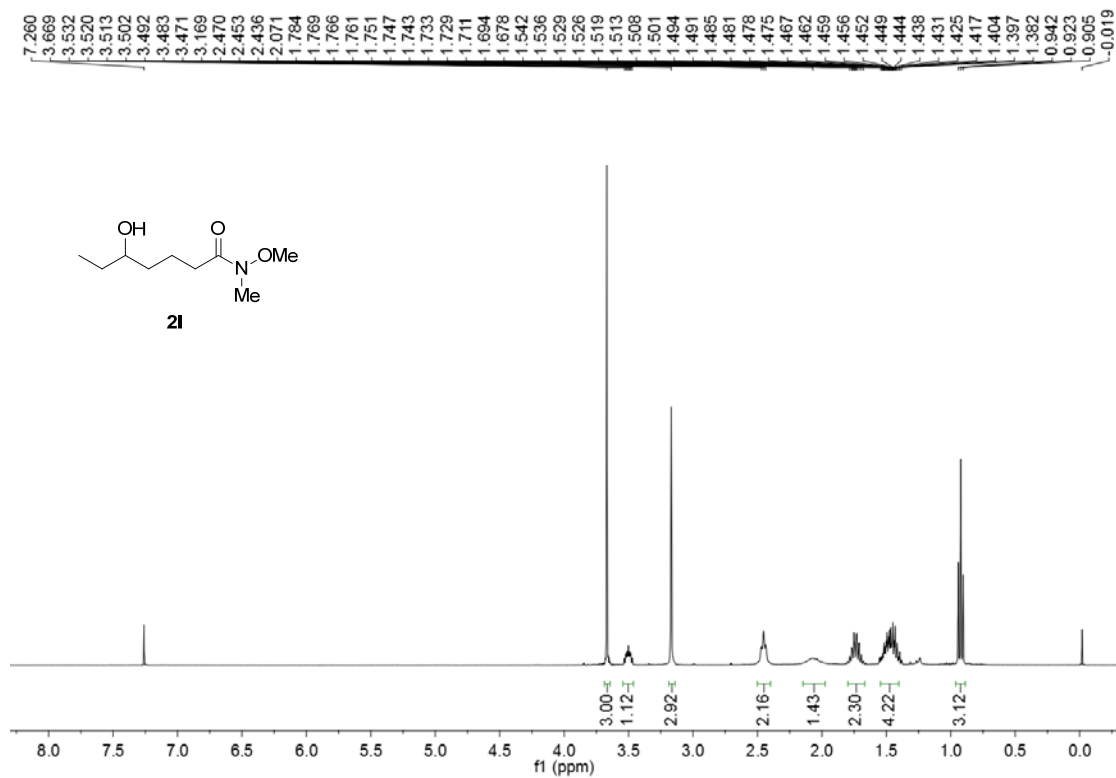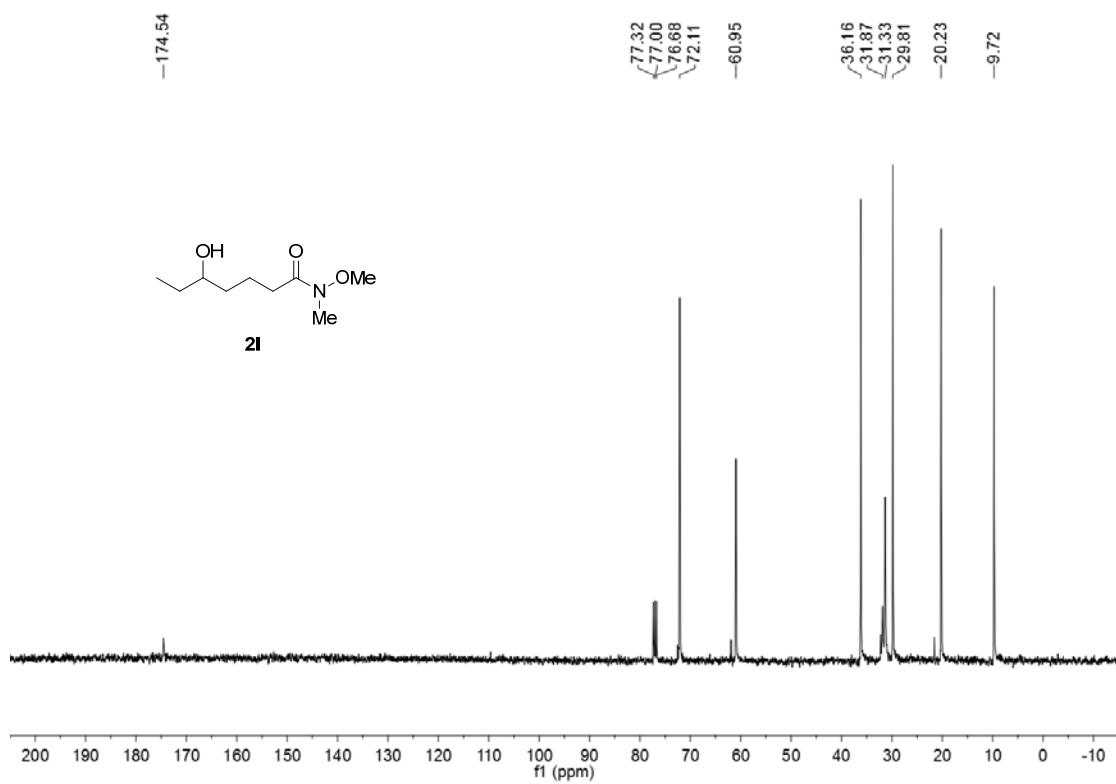

7-(methoxy(methyl)amino)-7-oxoheptan-3-yl-4-nitrobenzoate, (2I')

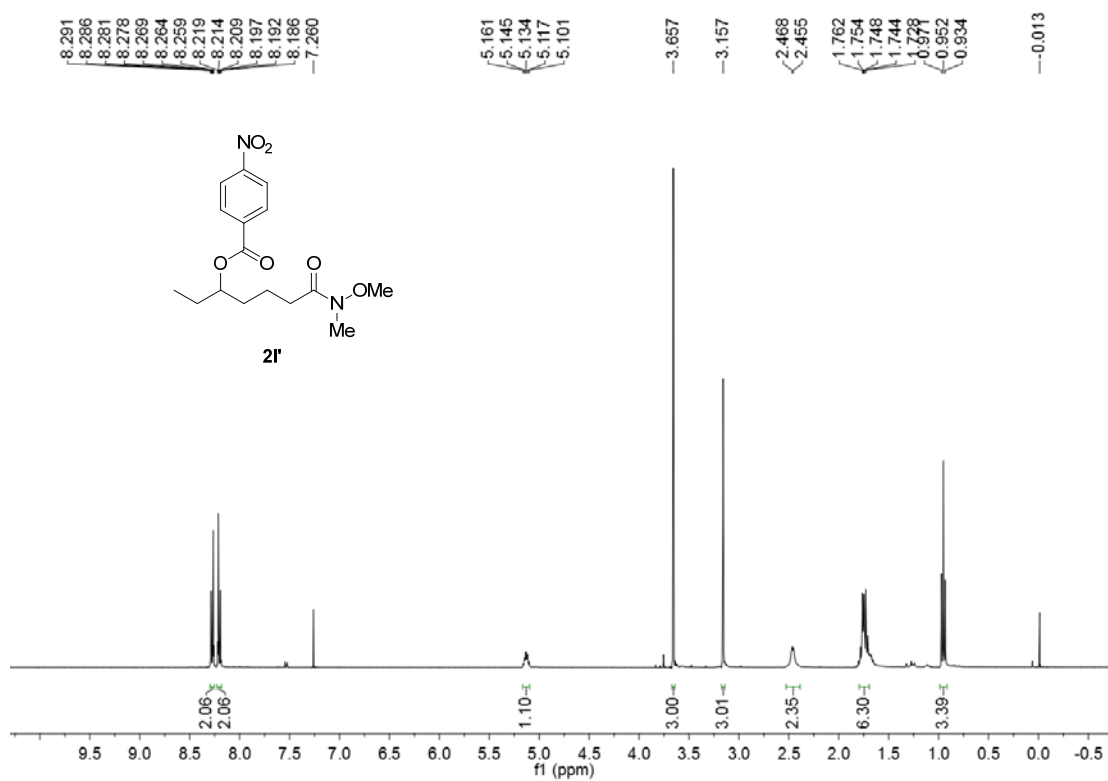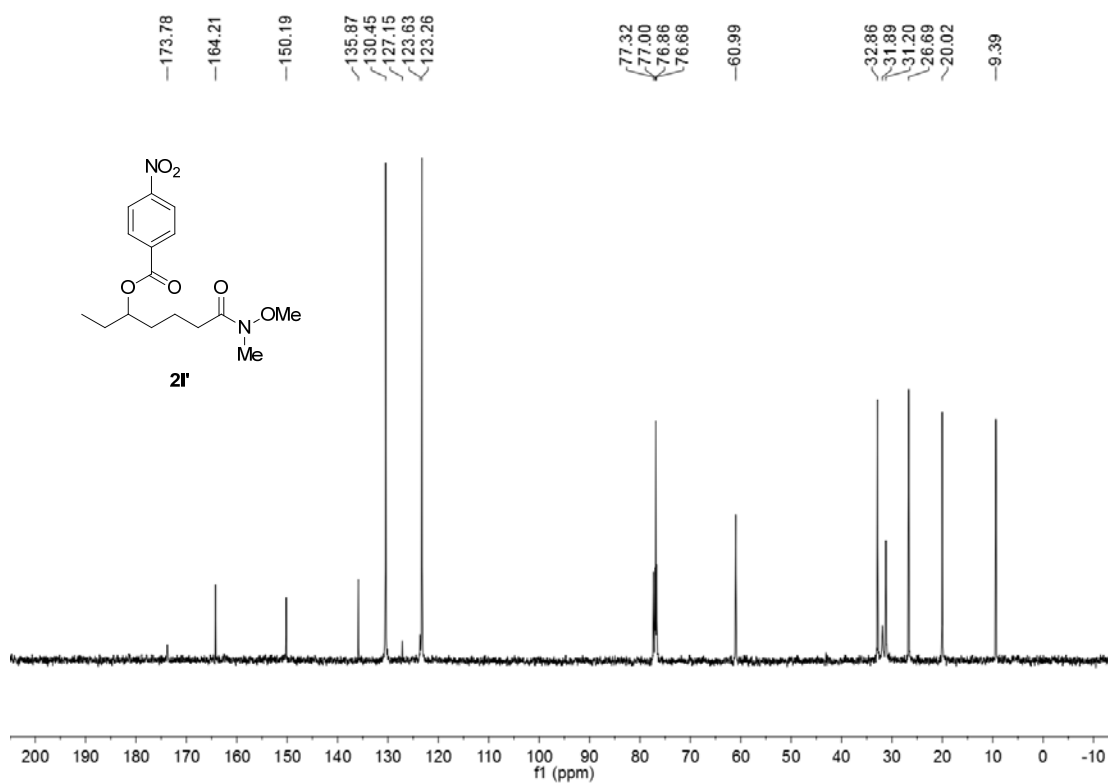

**5-Hydroxy-N-methoxy-N-methyl-6-phenylhexanamide, (2m)**

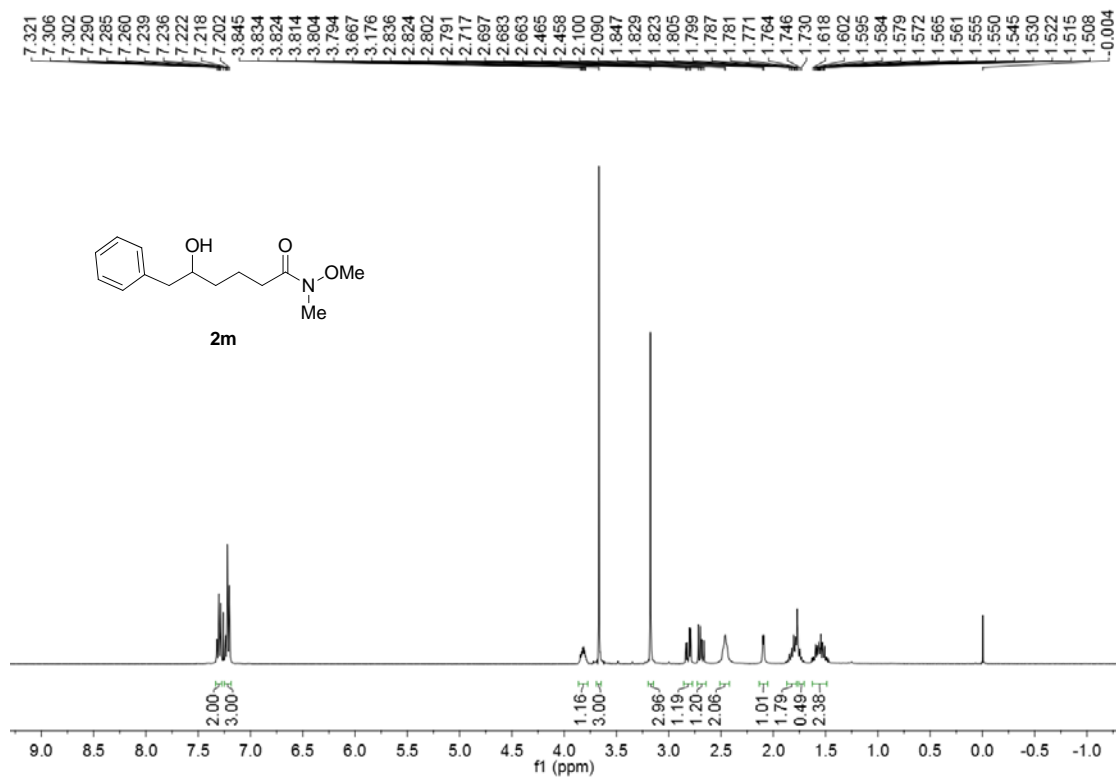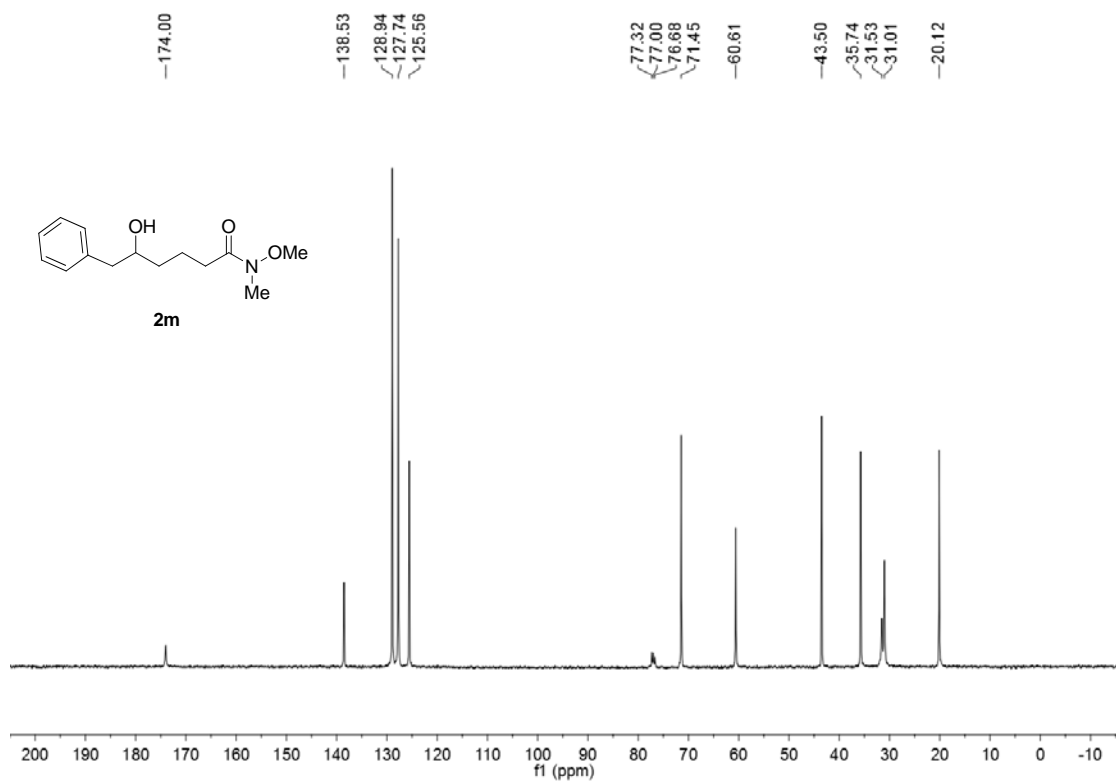

5-((Tert-butyldimethylsilyl)oxy)-*N*-methoxy-5-(4-methoxyphenyl)-*N*-methylpentanamide, (3)

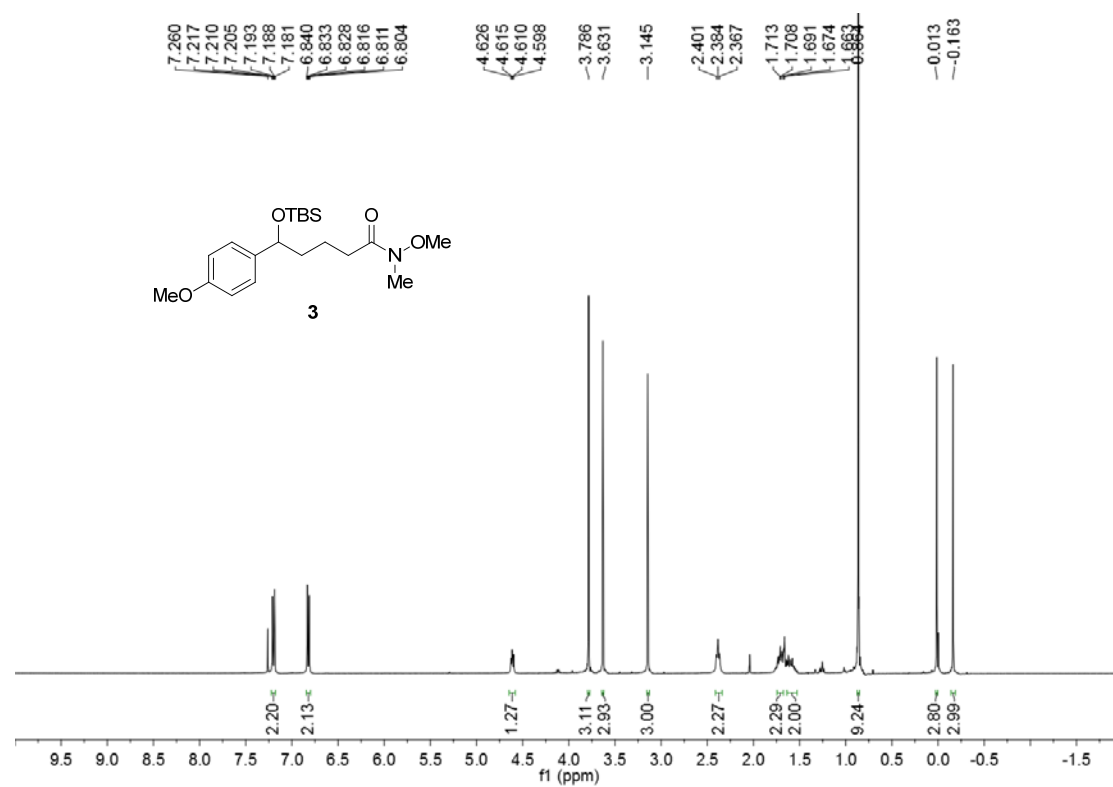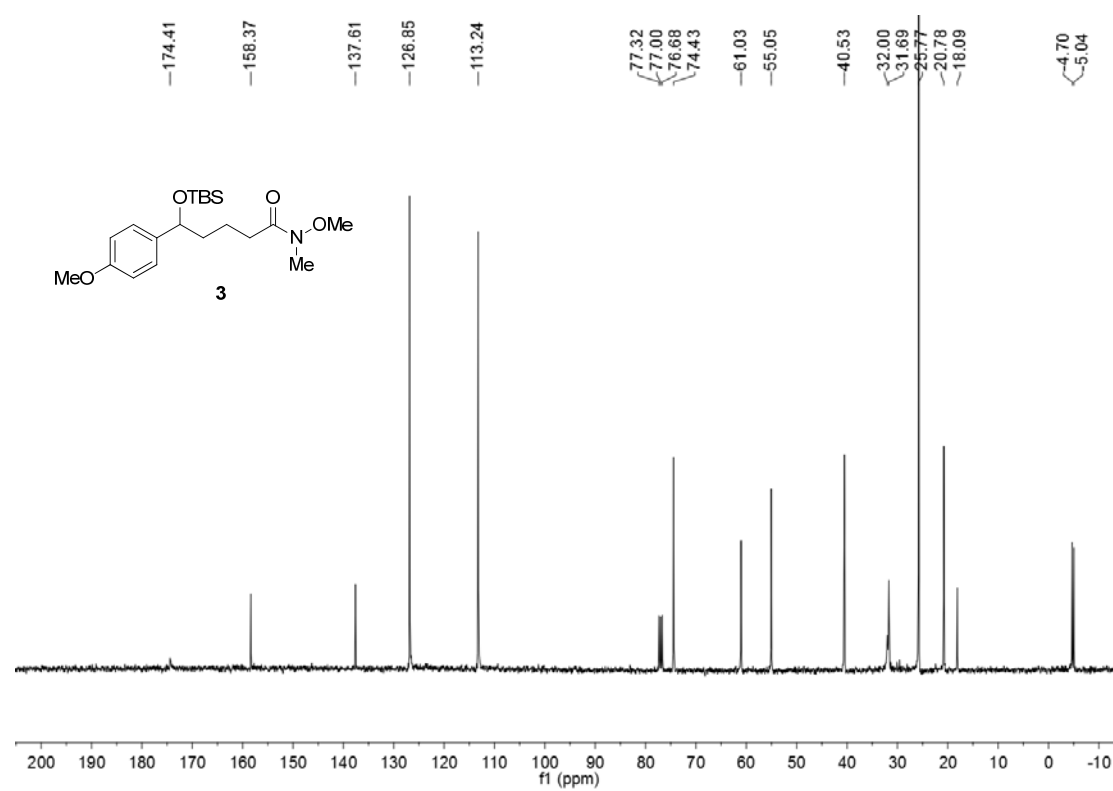

5-((Tert-butyldimethylsilyl)oxy)-5-(4-methoxyphenyl)pentanal, (4)

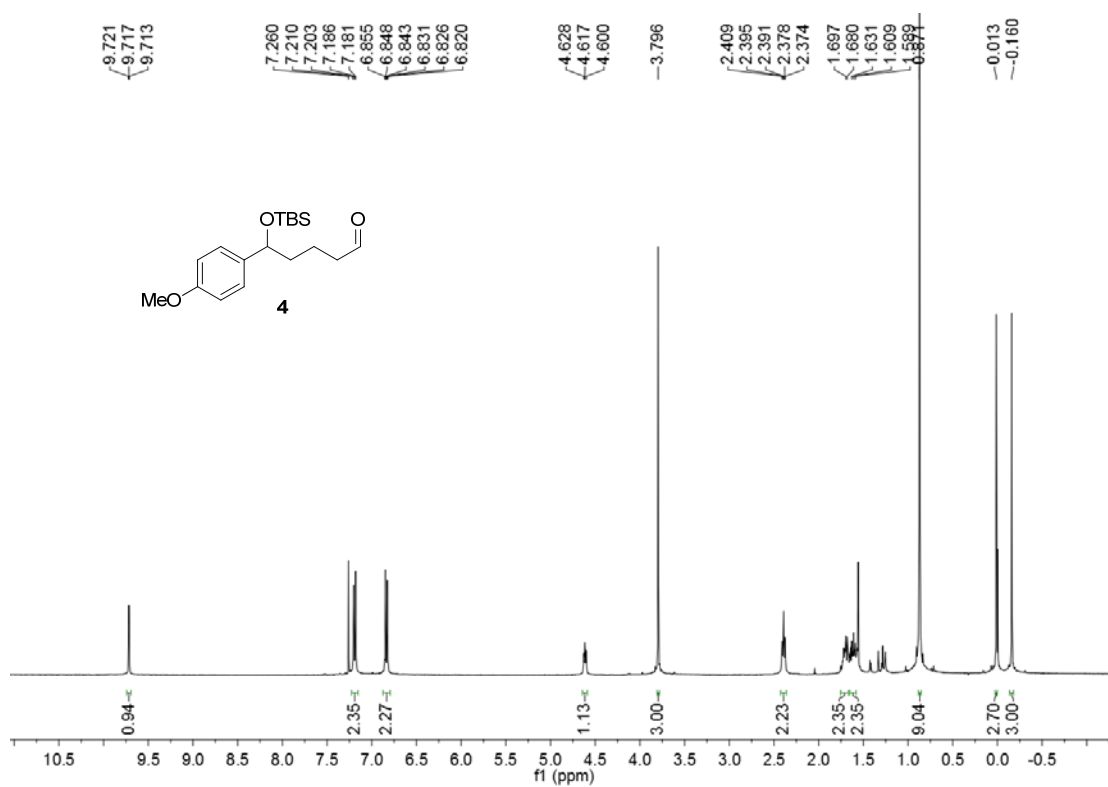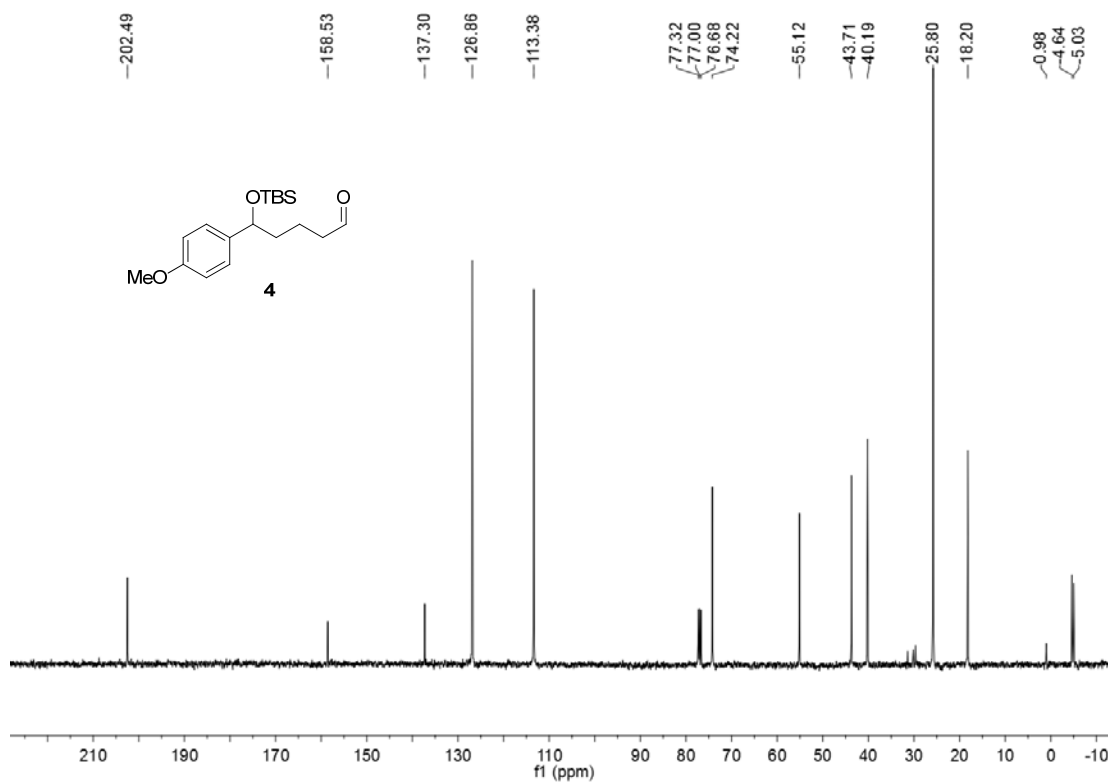

## HPLC copies for racemic and chiral compounds

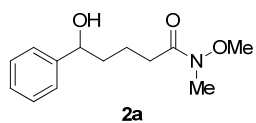

### Racemate:

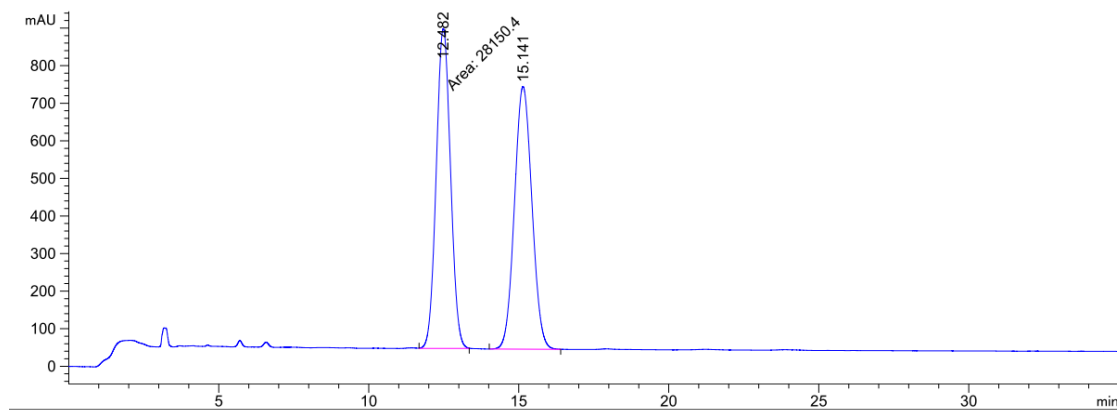

| Peak # | RetTime [min] | Type | Width [min] | Area [mAU*s] | Height [mAU] | Area %  |
|--------|---------------|------|-------------|--------------|--------------|---------|
| 1      | 12.482        | MM   | 0.5512      | 2.81504e4    | 851.17047    | 49.8349 |
| 2      | 15.141        | BV   | 0.4834      | 2.83370e4    | 699.06165    | 50.1651 |

### Table 1, entry 1 ((S)-SunPhos)

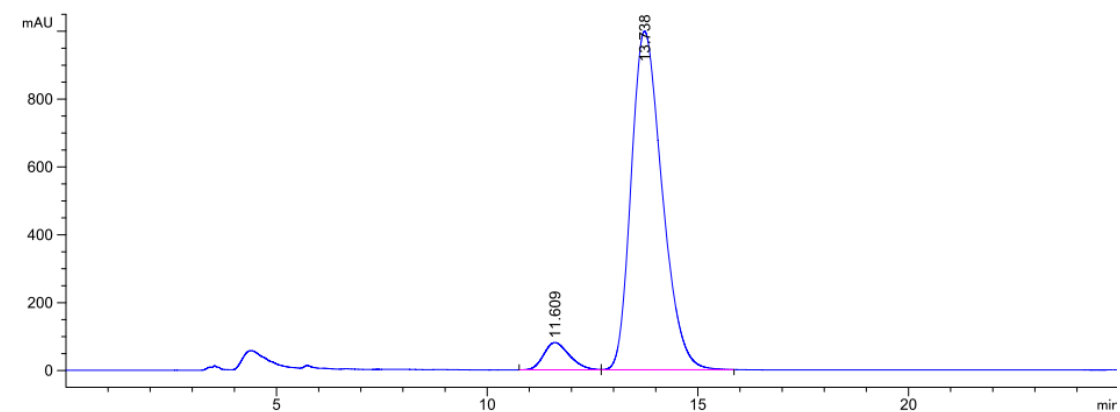

| Peak # | RetTime [min] | Type | Width [min] | Area [mAU*s] | Height [mAU] | Area %  |
|--------|---------------|------|-------------|--------------|--------------|---------|
| 1      | 11.609        | BV   | 0.4935      | 3398.32056   | 80.50650     | 6.2591  |
| 2      | 13.738        | VV   | 0.6007      | 5.08957e4    | 997.64655    | 93.7409 |



**Table 1, entry 2 ((S)-BINAP)**

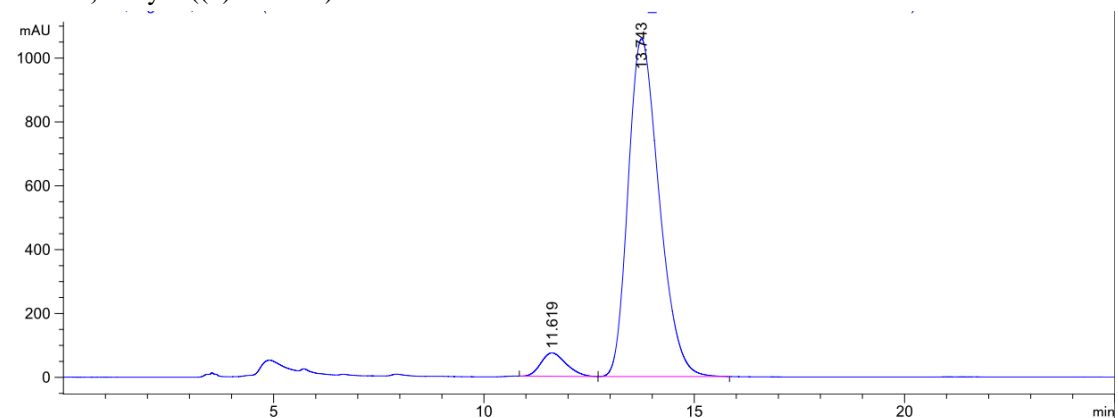

| Peak # | RetTime [min] | Type | Width [min] | Area [mAU*s] | Height [mAU] | Area %  |
|--------|---------------|------|-------------|--------------|--------------|---------|
| 1      | 11.619        | BB   | 0.4881      | 3050.62744   | 73.29433     | 5.3319  |
| 2      | 13.743        | BV   | 0.6006      | 5.41645e4    | 1057.33960   | 94.6681 |

**Table 1, entry 3 ((S)-SegPhos)**

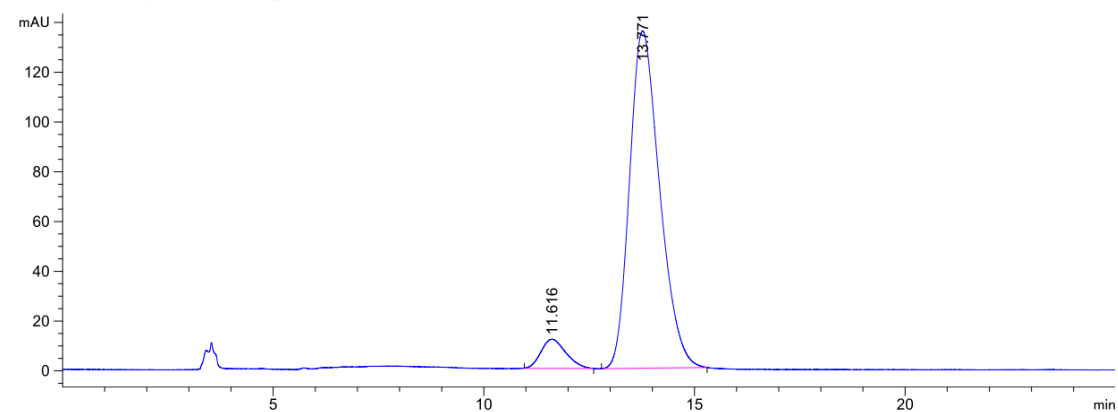

| Peak # | RetTime [min] | Type | Width [min] | Area [mAU*s] | Height [mAU] | Area %  |
|--------|---------------|------|-------------|--------------|--------------|---------|
| 1      | 11.616        | BB   | 0.4809      | 479.56158    | 11.71870     | 6.6460  |
| 2      | 13.771        | BB   | 0.5814      | 6736.17920   | 135.64049    | 93.3540 |

**Table 1, entry 4 ((S)-SynPhos)**

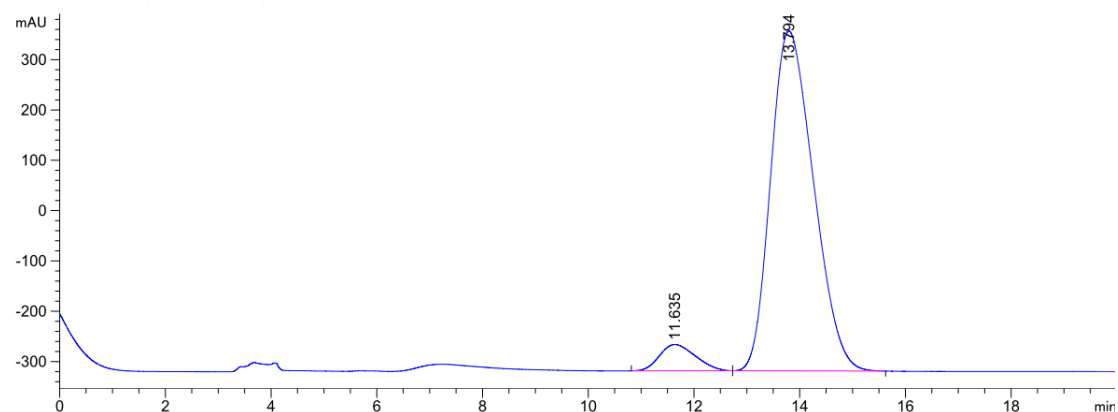

| Peak # | RetTime [min] | Type | Width [min] | Area [mAU*s] | Height [mAU] | Area %  |
|--------|---------------|------|-------------|--------------|--------------|---------|
| 1      | 11.635        | BB   | 0.5508      | 2458.96313   | 52.22245     | 6.0759  |
| 2      | 13.794        | BB   | 0.6591      | 3.80119e4    | 675.40698    | 93.9241 |

**Table 1, entry 5 ((S)-C3-TunePhos)**

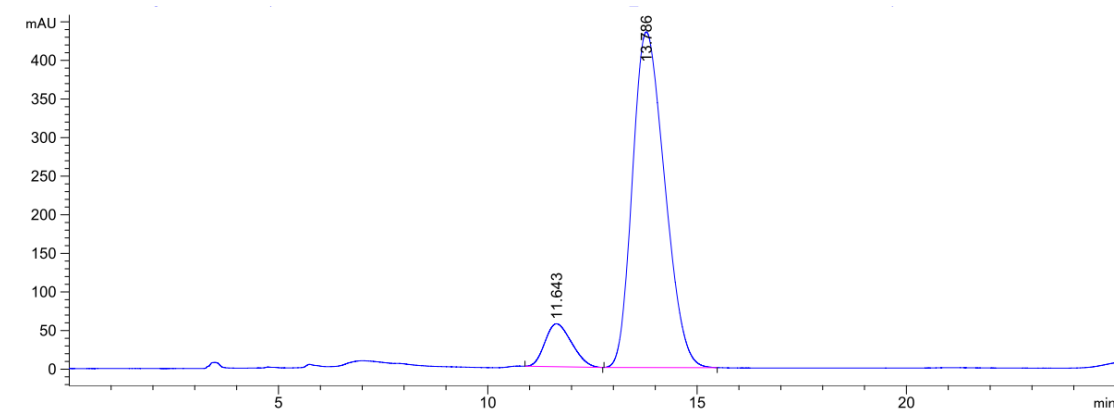

| Peak # | RetTime [min] | Type | Width [min] | Area [mAU*s] | Height [mAU] | Area %  |
|--------|---------------|------|-------------|--------------|--------------|---------|
| 1      | 11.643        | BB   | 0.5188      | 2462.34229   | 55.69004     | 9.5893  |
| 2      | 13.786        | BV   | 0.6274      | 2.32157e4    | 434.81445    | 90.4107 |

**Table 1, entry 6 ((R)-4-Me-SunPhos)**

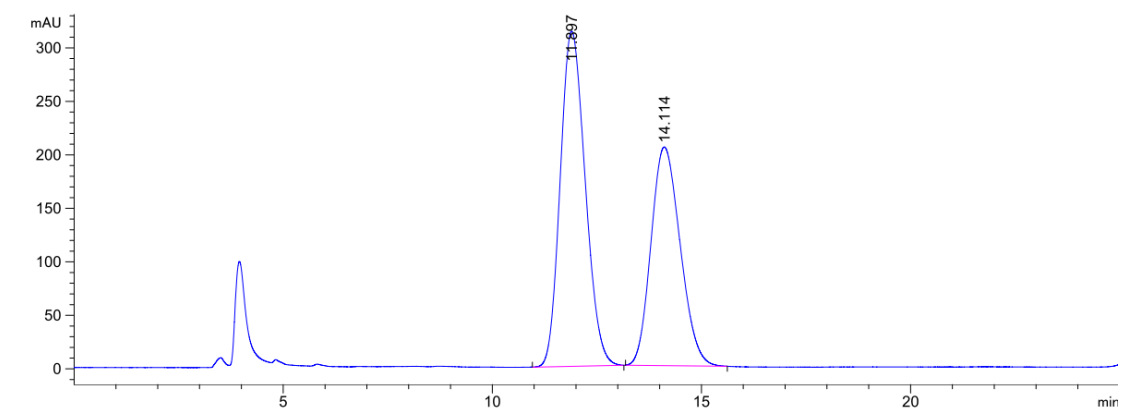

| Peak # | RetTime [min] | Type | Width [min] | Area [mAU*s] | Height [mAU] | Area %  |
|--------|---------------|------|-------------|--------------|--------------|---------|
| 1      | 11.897        | BB   | 0.4853      | 1.29900e4    | 313.23044    | 56.7127 |
| 2      | 14.114        | BB   | 0.5710      | 9914.89746   | 204.38637    | 43.2873 |

**Table 1, entry 7 ((S)-3,5-(CH<sub>3</sub>)<sub>2</sub>-SunPhos)**

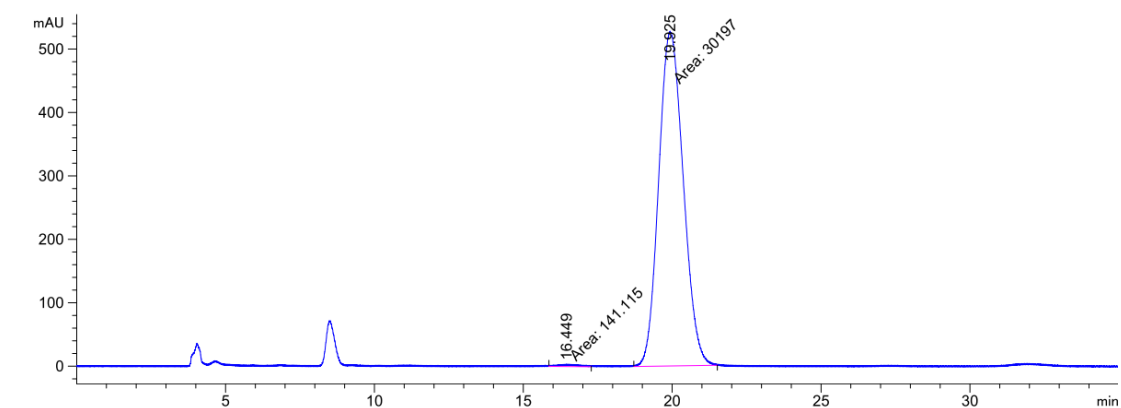

| Peak # | RetTime [min] | Type | Width [min] | Area [mAU*s] | Height [mAU] | Area %  |
|--------|---------------|------|-------------|--------------|--------------|---------|
| 1      | 16.449        | MM   | 0.6348      | 141.11485    | 3.70516      | 0.4651  |
| 2      | 19.925        | MM   | 0.9535      | 3.01970e4    | 527.82813    | 99.5349 |

**Table 2, entry 1 (in MeOH)**

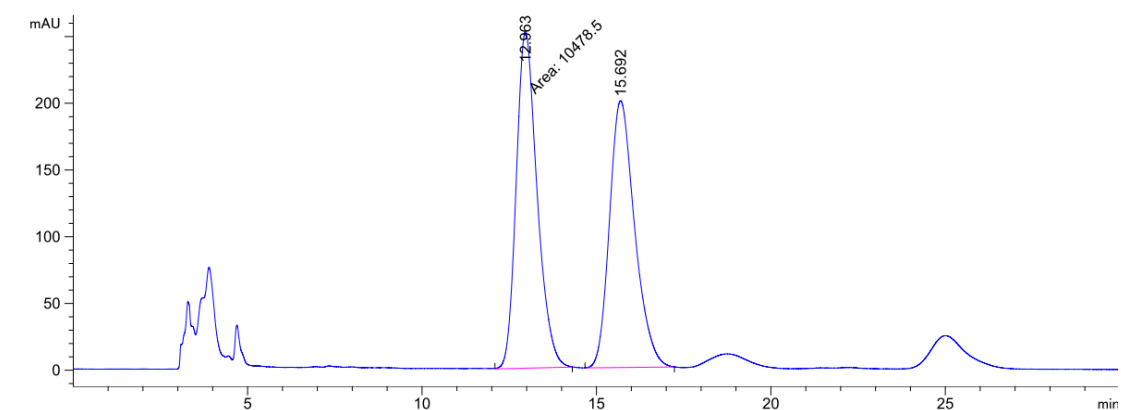

| Peak # | RetTime [min] | Type | Width [min] | Area [mAU*s] | Height [mAU] | Area %  |
|--------|---------------|------|-------------|--------------|--------------|---------|
| 1      | 12.963        | MM   | 0.6934      | 1.04785e4    | 251.88022    | 51.1177 |
| 2      | 15.692        | BB   | 0.5861      | 1.00203e4    | 199.95497    | 48.8823 |

**Table 2, entry 2 (in EtOH)**

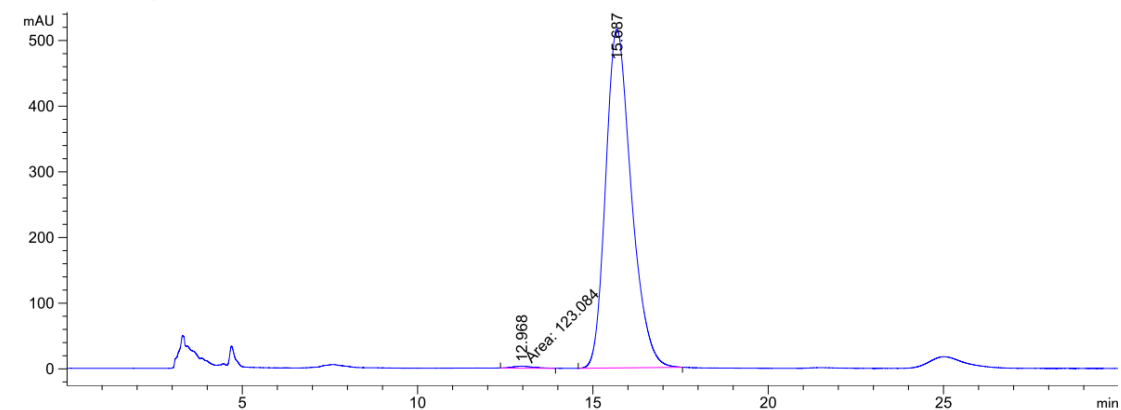

| Peak # | RetTime [min] | Type | Width [min] | Area [mAU*s] | Height [mAU] | Area %  |
|--------|---------------|------|-------------|--------------|--------------|---------|
| 1      | 12.968        | MM   | 0.6758      | 123.08389    | 3.03547      | 0.4676  |
| 2      | 15.687        | BB   | 0.6007      | 2.62014e4    | 515.32111    | 99.5324 |

**Table 2, entry 3 (in DCM)**

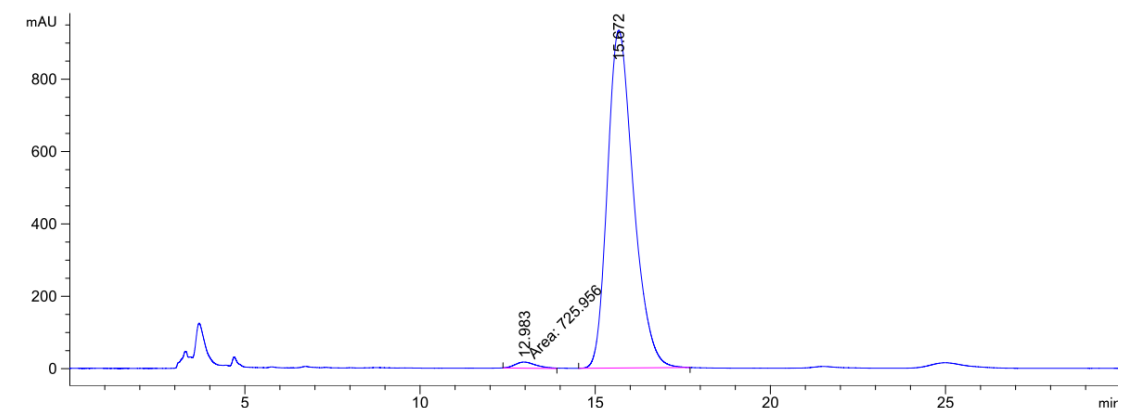

| Peak # | RetTime [min] | Type | Width [min] | Area [mAU*s] | Height [mAU] | Area %  |
|--------|---------------|------|-------------|--------------|--------------|---------|
| 1      | 12.983        | MM   | 0.7079      | 725.95599    | 17.09226     | 1.4859  |
| 2      | 15.672        | BB   | 0.6032      | 4.81319e4    | 933.26086    | 98.5141 |

**Table 2, entry 5 (in Toluene)**

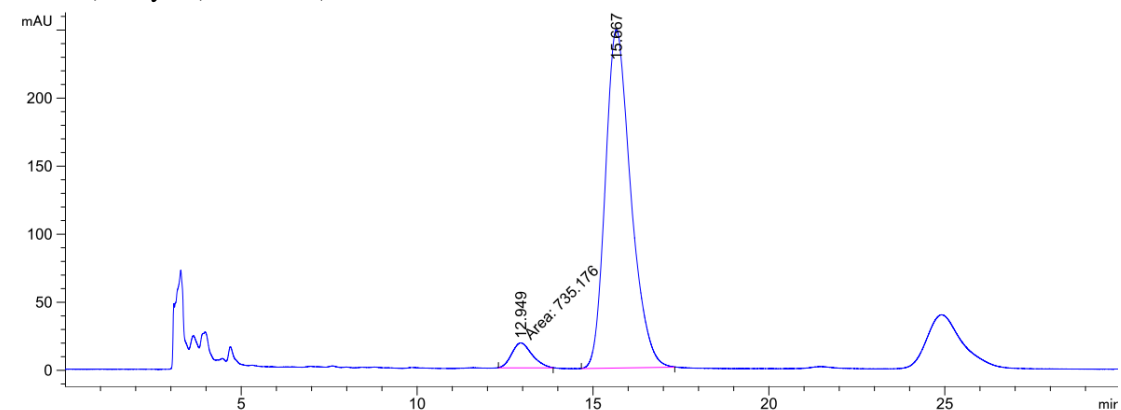

| Peak # | RetTime [min] | Type | Width [min] | Area [mAU*s] | Height [mAU] | Area %  |
|--------|---------------|------|-------------|--------------|--------------|---------|
| 1      | 12.949        | MM   | 0.6682      | 735.17566    | 18.33700     | 5.5444  |
| 2      | 15.667        | VV   | 0.5927      | 1.25245e4    | 248.61723    | 94.4556 |

**Table 2, entry 6 (KOH)**

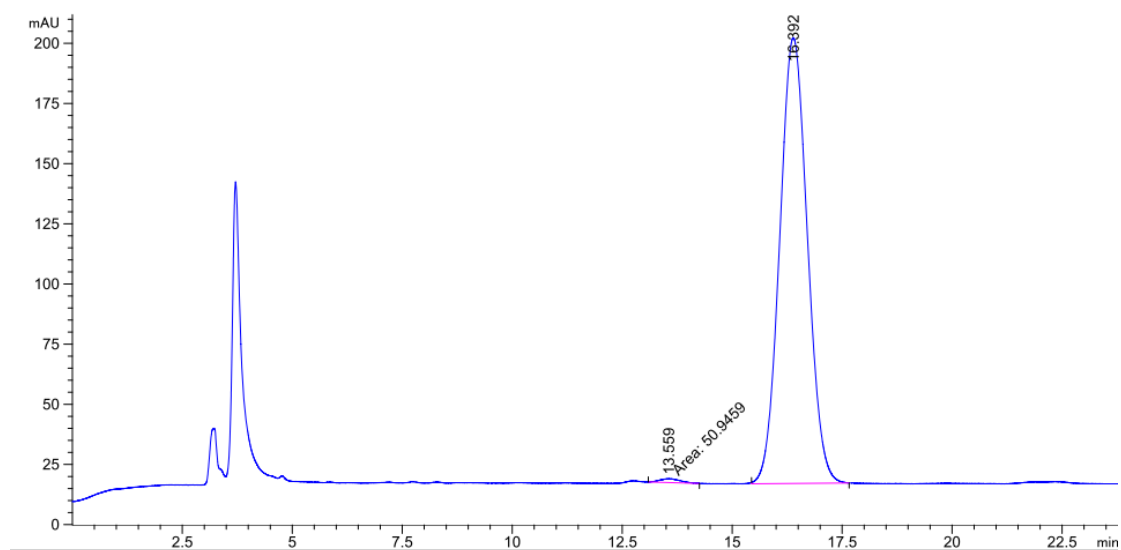

| Peak # | RetTime [min] | Type | Width [min] | Area [mAU*s] | Height [mAU] | Area %  |
|--------|---------------|------|-------------|--------------|--------------|---------|
| 1      | 13.559        | MM   | 0.5337      | 50.94591     | 1.59098      | 0.6256  |
| 2      | 16.392        | VB   | 0.5149      | 8092.37549   | 185.17209    | 99.3744 |

**Table 2, entry 7 (K<sub>2</sub>CO<sub>3</sub>)**

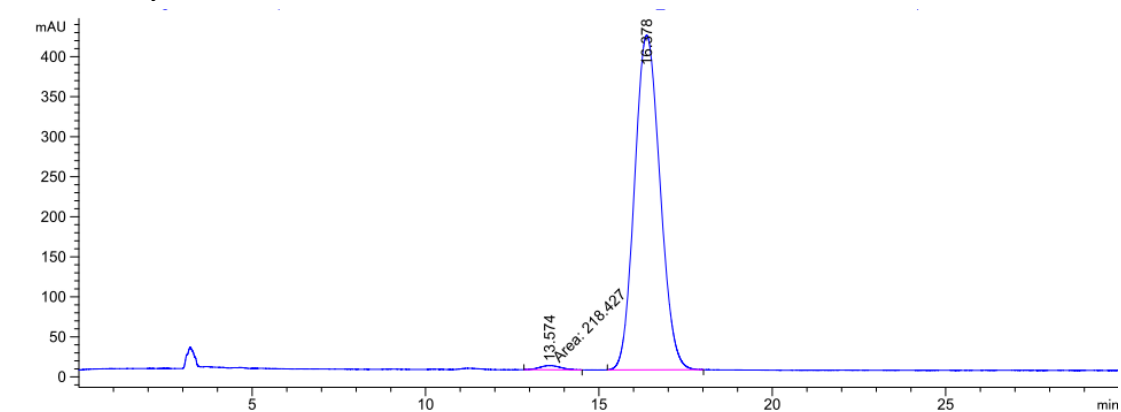

| Peak # | RetTime [min] | Type | Width [min] | Area [mAU*s] | Height [mAU] | Area %  |
|--------|---------------|------|-------------|--------------|--------------|---------|
| 1      | 13.574        | MM   | 0.6881      | 218.42688    | 5.29096      | 1.0142  |
| 2      | 16.378        | VB   | 0.5977      | 2.13195e4    | 417.89914    | 98.9858 |

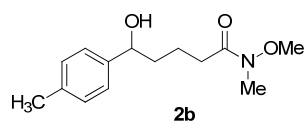

**Racemate:**

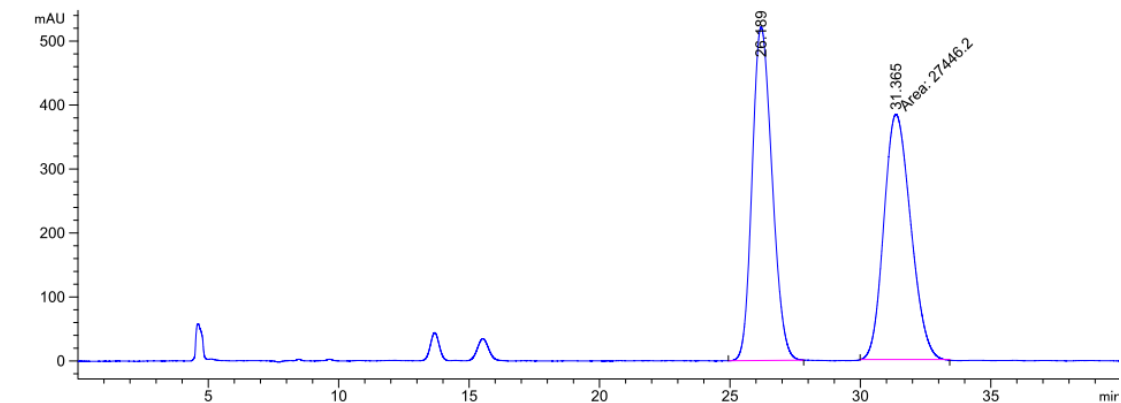

| Peak # | RetTime [min] | Type | Width [min] | Area [mAU*s] | Height [mAU] | Area %  |
|--------|---------------|------|-------------|--------------|--------------|---------|
| 1      | 26.189        | BV   | 0.6225      | 2.76972e4    | 521.15942    | 50.2276 |
| 2      | 31.365        | MM   | 1.1931      | 2.74462e4    | 383.40515    | 49.7724 |

**Table 2, entry 2**

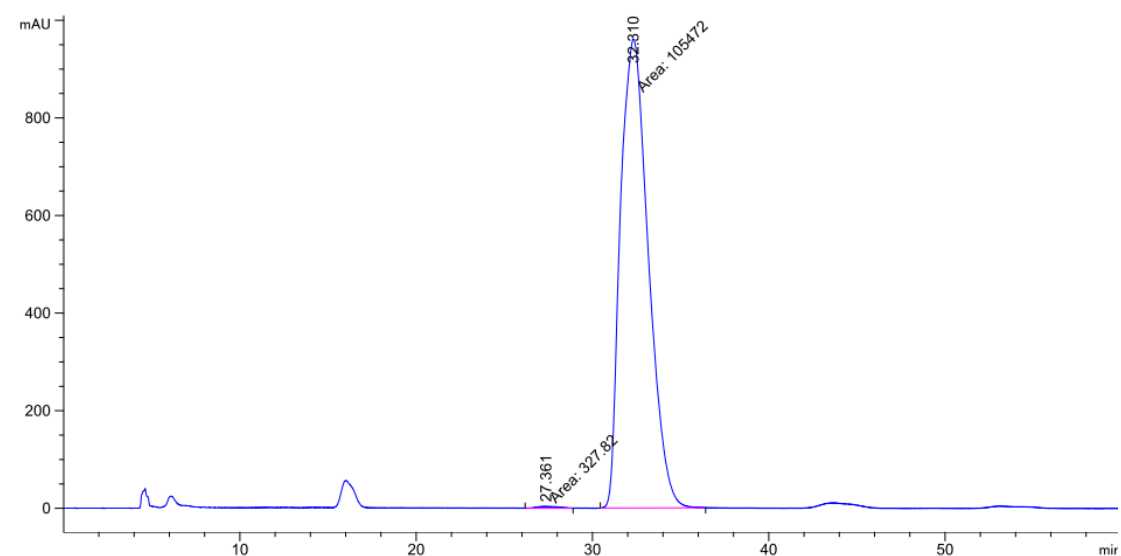

| Peak # | RetTime [min] | Type | Width [min] | Area [mAU*s] | Height [mAU] | Area %  |
|--------|---------------|------|-------------|--------------|--------------|---------|
| 1      | 27.361        | MM   | 1.3368      | 327.82010    | 4.08701      | 0.3099  |
| 2      | 32.310        | MM   | 1.8302      | 1.05472e5    | 960.46600    | 99.6901 |

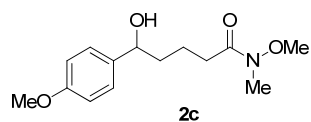

**Racemate:**

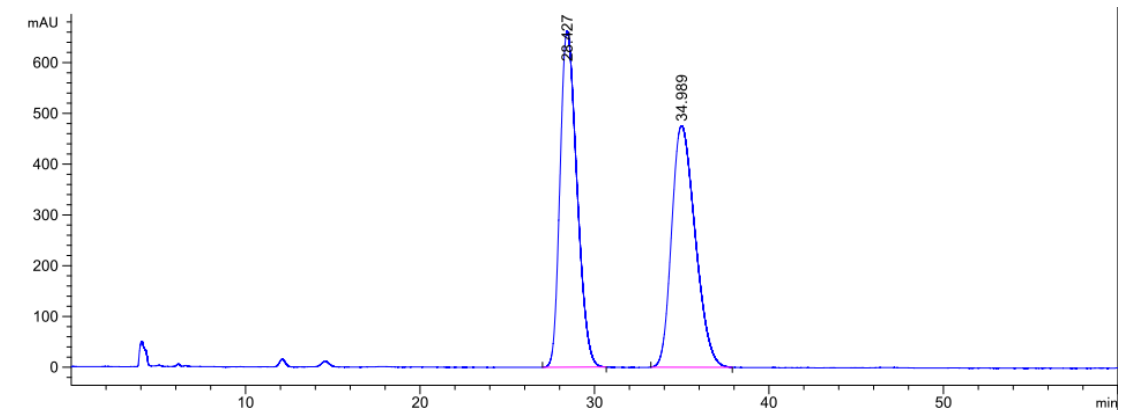

| Peak # | RetTime [min] | Type | Width [min] | Area [mAU*s] | Height [mAU] | Area %  |
|--------|---------------|------|-------------|--------------|--------------|---------|
| 1      | 28.427        | BB   | 0.7868      | 4.45591e4    | 661.98914    | 49.9994 |
| 2      | 34.989        | BB   | 1.0944      | 4.45602e4    | 475.66702    | 50.0006 |

**Table 2, entry 3**

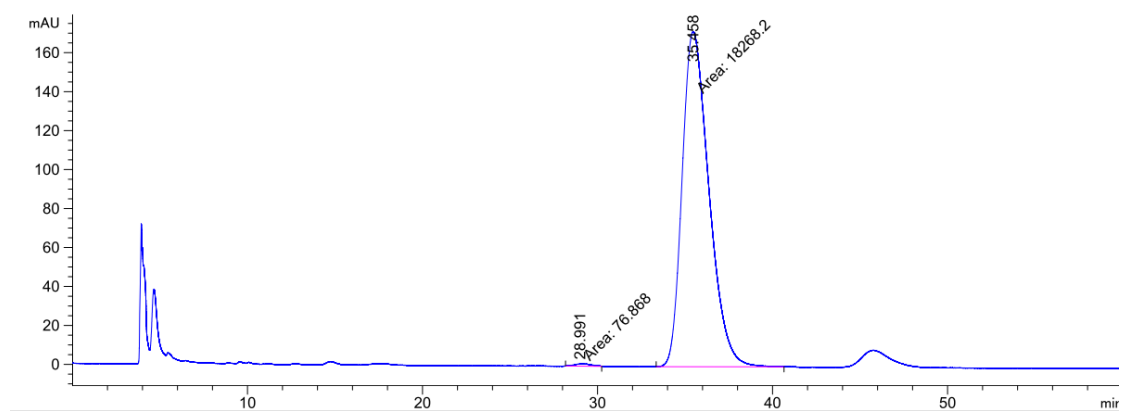

| Peak # | RetTime [min] | Type | Width [min] | Area [mAU*s] | Height [mAU] | Area %  |
|--------|---------------|------|-------------|--------------|--------------|---------|
| 1      | 28.991        | MM   | 1.0898      | 76.86803     | 1.17553      | 0.4190  |
| 2      | 35.458        | MM   | 1.7699      | 1.82682e4    | 172.03104    | 99.5810 |



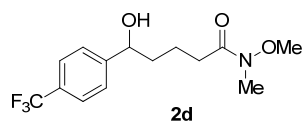

**Racemate:**

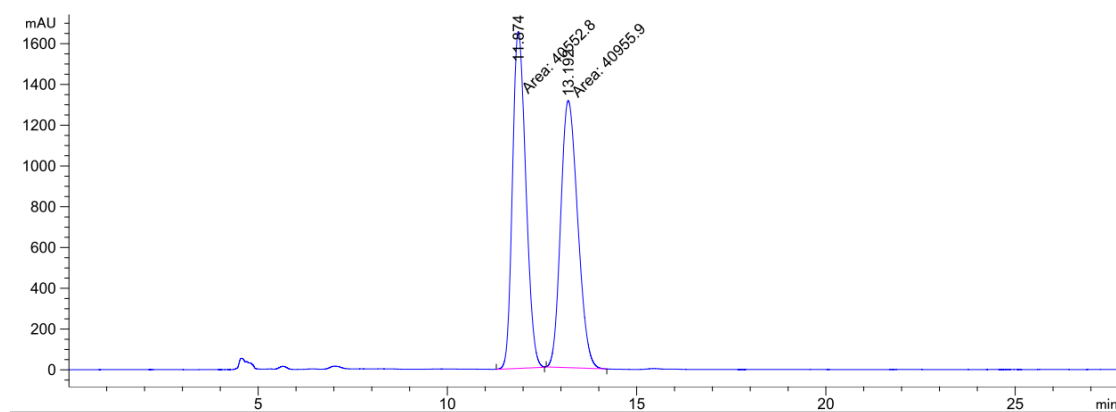

| Peak # | RetTime [min] | Type | Width [min] | Area [mAU*s] | Height [mAU] | Area %  |
|--------|---------------|------|-------------|--------------|--------------|---------|
| 1      | 11.874        | MM   | 0.4091      | 4.05528e4    | 1652.03357   | 49.7527 |
| 2      | 13.192        | MM   | 0.5210      | 4.09559e4    | 1310.16724   | 50.2473 |

**Table 2, entry 4**

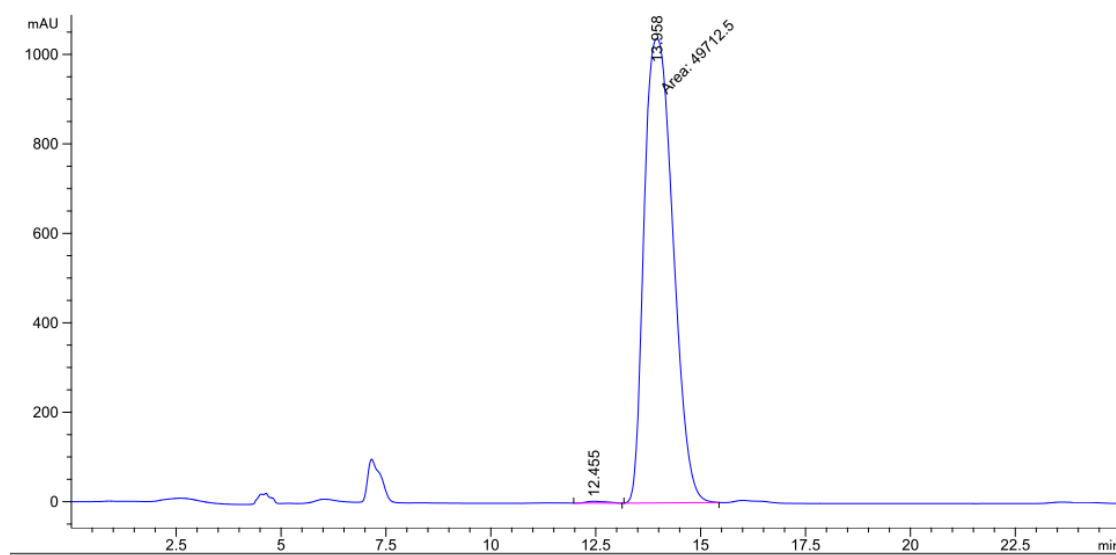

| Peak # | RetTime [min] | Type | Width [min] | Area [mAU*s] | Height [mAU] | Area %  |
|--------|---------------|------|-------------|--------------|--------------|---------|
| 1      | 12.455        | BB   | 0.4619      | 134.57985    | 3.96566      | 0.2700  |
| 2      | 13.958        | MM   | 0.7979      | 4.97125e4    | 1038.34863   | 99.7300 |

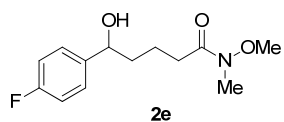

**Racemate:**

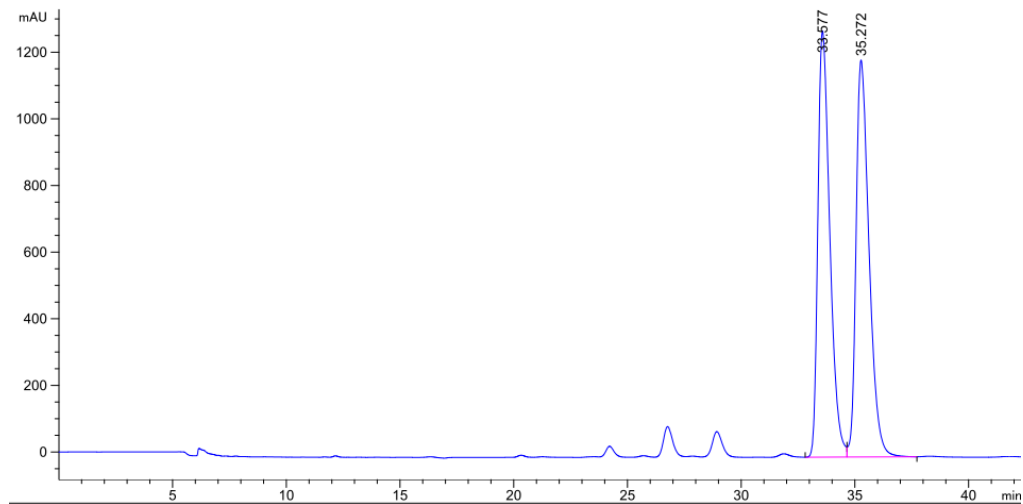

| Peak # | RetTime [min] | Type | Width [min] | Area [mAU*s] | Height [mAU] | Area %  |
|--------|---------------|------|-------------|--------------|--------------|---------|
| 1      | 33.577        | BV   | 0.5520      | 4.65062e4    | 1279.50391   | 49.5689 |
| 2      | 35.272        | VB   | 0.6074      | 4.73151e4    | 1191.26733   | 50.4311 |

**Table 2, entry 5**

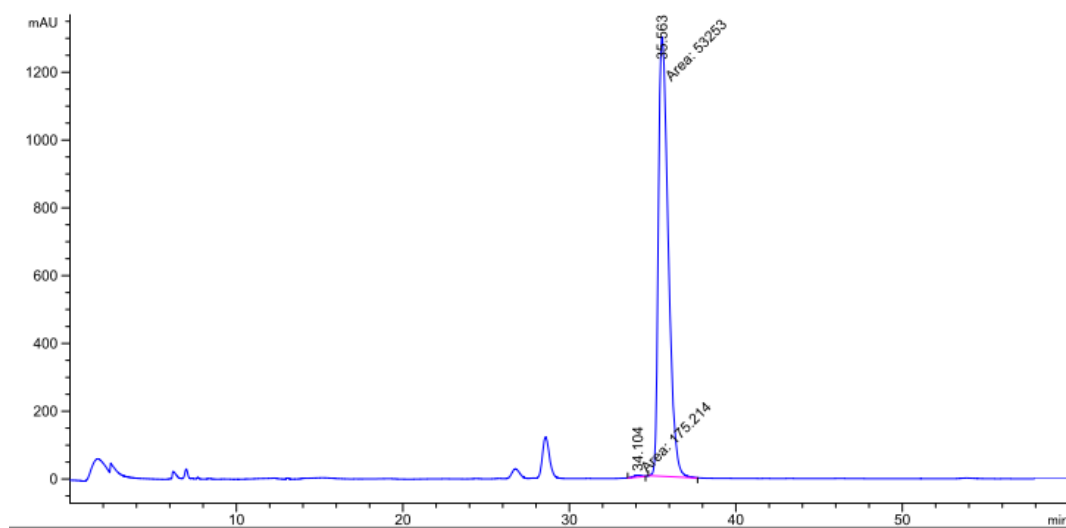

| Peak # | RetTime [min] | Type | Width [min] | Area [mAU*s] | Height [mAU] | Area %  |
|--------|---------------|------|-------------|--------------|--------------|---------|
| 1      | 34.104        | MM   | 0.5641      | 175.21384    | 5.17634      | 0.3279  |
| 2      | 35.563        | MM   | 0.6847      | 5.32530e4    | 1296.24536   | 99.6721 |

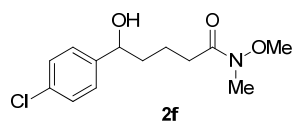

**Racemate:**

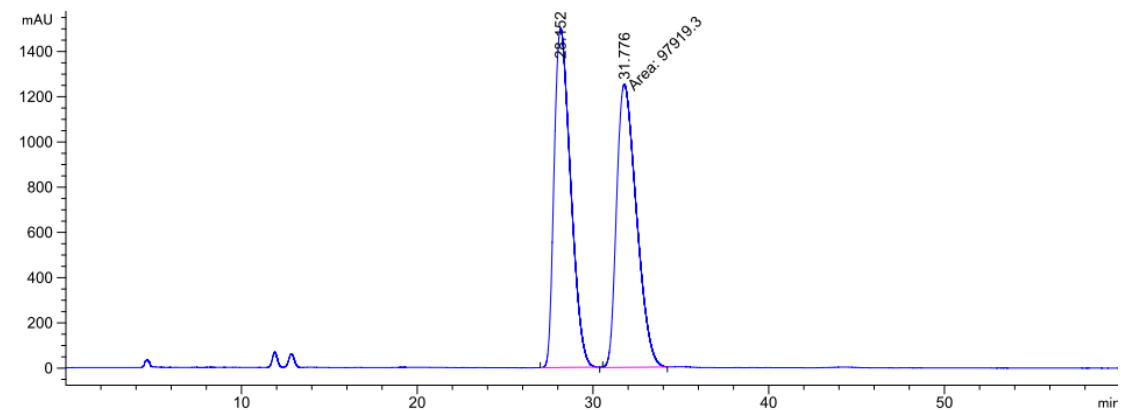

| Peak # | RetTime [min] | Type | Width [min] | Area [mAU*s] | Height [mAU] | Area %  |
|--------|---------------|------|-------------|--------------|--------------|---------|
| 1      | 28.152        | BB   | 0.7609      | 9.76372e4    | 1500.01270   | 49.9279 |
| 2      | 31.776        | MM   | 1.3024      | 9.79193e4    | 1253.03162   | 50.0721 |

**Table 2, entry 6**

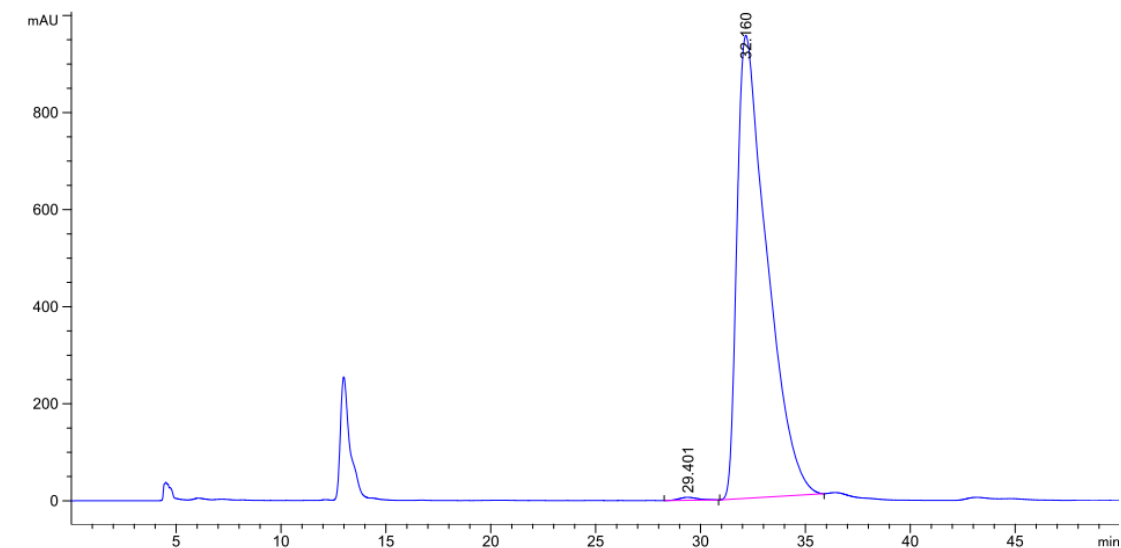

| Peak # | RetTime [min] | Type | Width [min] | Area [mAU*s] | Height [mAU] | Area %  |
|--------|---------------|------|-------------|--------------|--------------|---------|
| 1      | 29.401        | BB   | 0.7512      | 386.18127    | 6.11175      | 0.4073  |
| 2      | 32.160        | BB   | 1.4107      | 9.44200e4    | 954.01752    | 99.5927 |

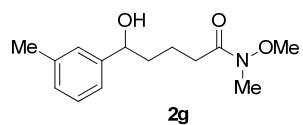

**Racemate:**

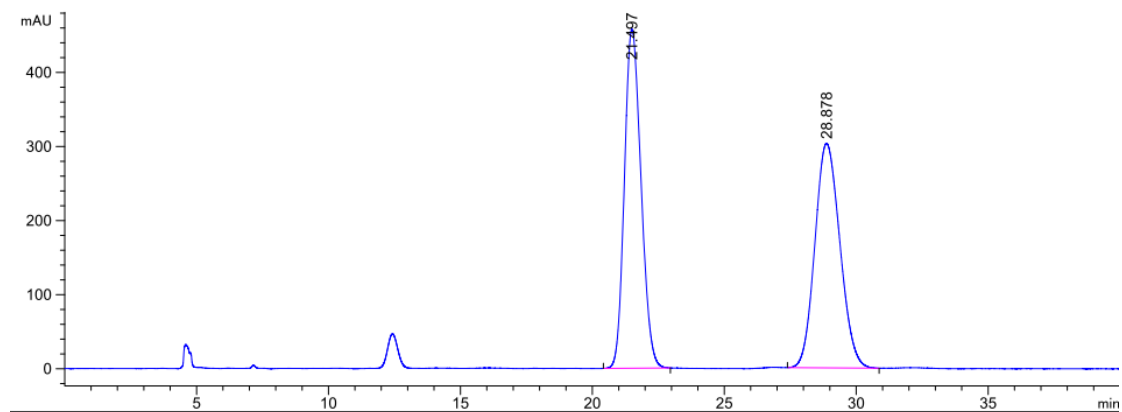

| Peak # | RetTime [min] | Type | Width [min] | Area [mAU*s] | Height [mAU] | Area %  |
|--------|---------------|------|-------------|--------------|--------------|---------|
| 1      | 21.497        | BB   | 0.5147      | 2.00242e4    | 457.48560    | 50.0787 |
| 2      | 28.878        | BB   | 0.7706      | 1.99613e4    | 303.01355    | 49.9213 |

**Table 2, entry 7**

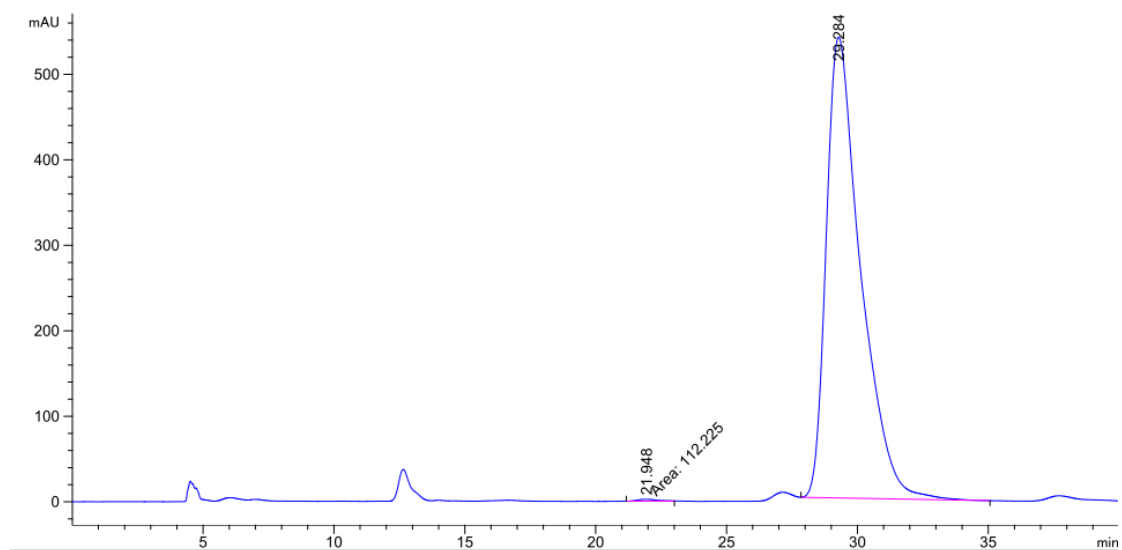

| Peak # | RetTime [min] | Type | Width [min] | Area [mAU*s] | Height [mAU] | Area %  |
|--------|---------------|------|-------------|--------------|--------------|---------|
| 1      | 21.948        | MM   | 0.8636      | 112.22507    | 2.16594      | 0.2274  |
| 2      | 29.284        | BB   | 1.3377      | 4.92308e4    | 538.95801    | 99.7726 |

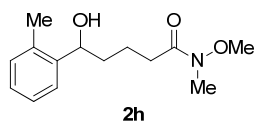

**Racemate:**

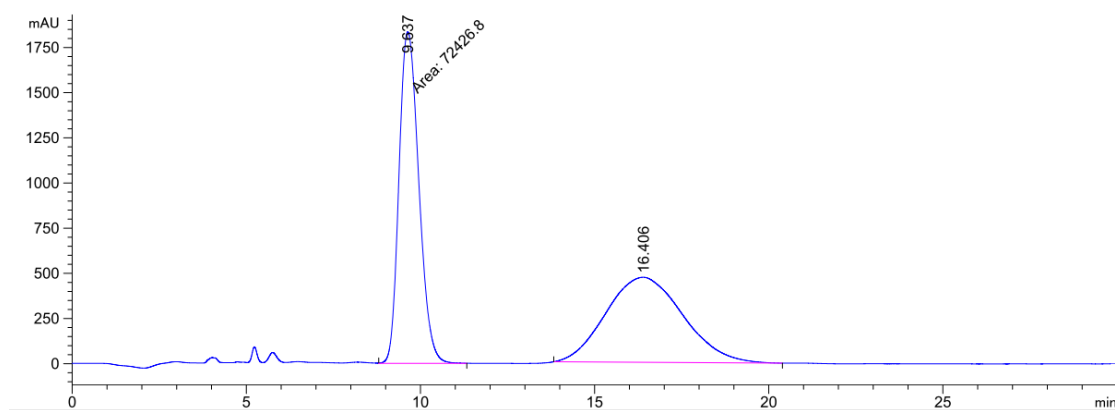

| Peak # | RetTime [min] | Type | Width [min] | Area [mAU*s] | Height [mAU] | Area %  |
|--------|---------------|------|-------------|--------------|--------------|---------|
| 1      | 9.637         | MM   | 0.6574      | 7.24268e4    | 1836.13538   | 50.0540 |
| 2      | 16.406        | BB   | 1.7954      | 7.22705e4    | 470.81250    | 49.9460 |

**Table 2, entry 8**

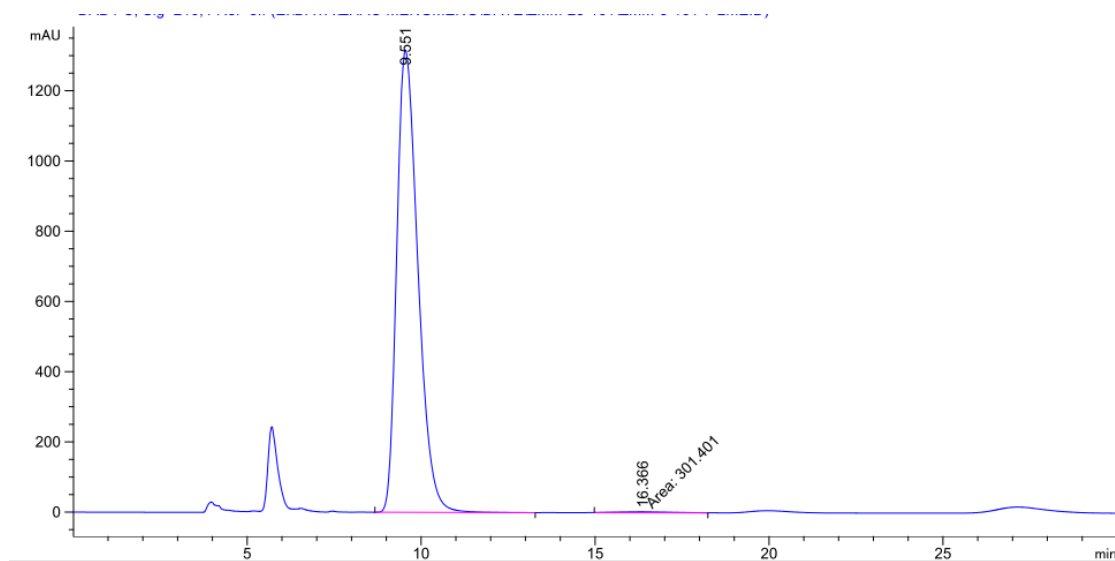

| Peak # | RetTime [min] | Type | Width [min] | Area [mAU*s] | Height [mAU] | Area %  |
|--------|---------------|------|-------------|--------------|--------------|---------|
| 1      | 9.551         | BB   | 0.6580      | 5.57344e4    | 1316.32678   | 99.4621 |
| 2      | 16.366        | MM   | 1.8959      | 301.40085    | 2.64952      | 0.5379  |

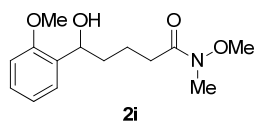

**Racemate:**

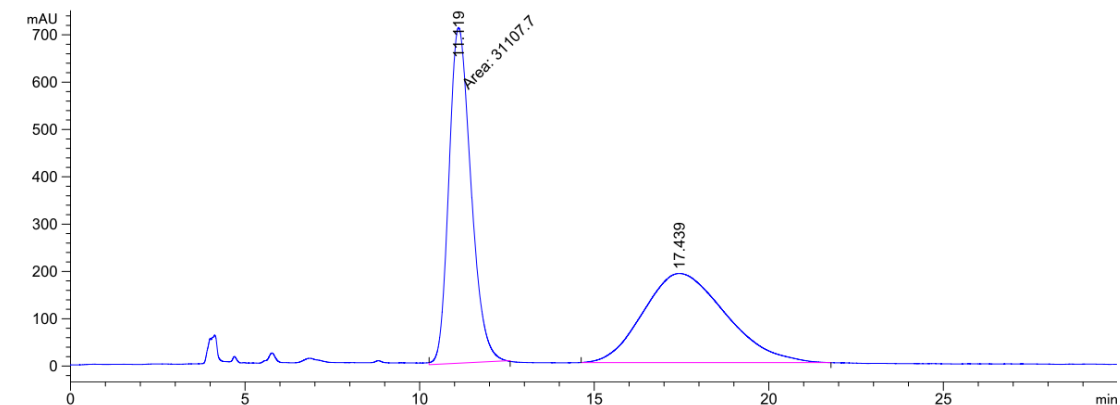

| Peak # | RetTime [min] | Type | Width [min] | Area [mAU*s] | Height [mAU] | Area %  |
|--------|---------------|------|-------------|--------------|--------------|---------|
| 1      | 11.119        | MM   | 0.7309      | 3.11077e4    | 709.32831    | 50.1771 |
| 2      | 17.439        | BB   | 1.9184      | 3.08882e4    | 188.14160    | 49.8229 |

**Table 2, entry 9**

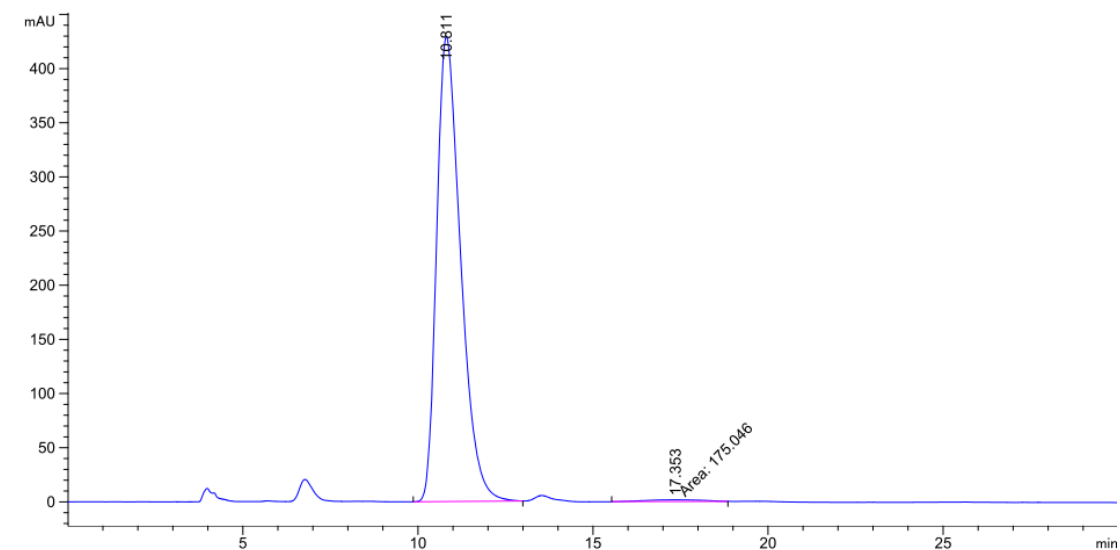

| Peak # | RetTime [min] | Type | Width [min] | Area [mAU*s] | Height [mAU] | Area %  |
|--------|---------------|------|-------------|--------------|--------------|---------|
| 1      | 10.811        | BB   | 0.7327      | 2.04167e4    | 429.38998    | 99.1499 |
| 2      | 17.353        | MM   | 1.8700      | 175.04645    | 1.56011      | 0.8501  |

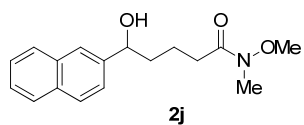

**Racemate:**

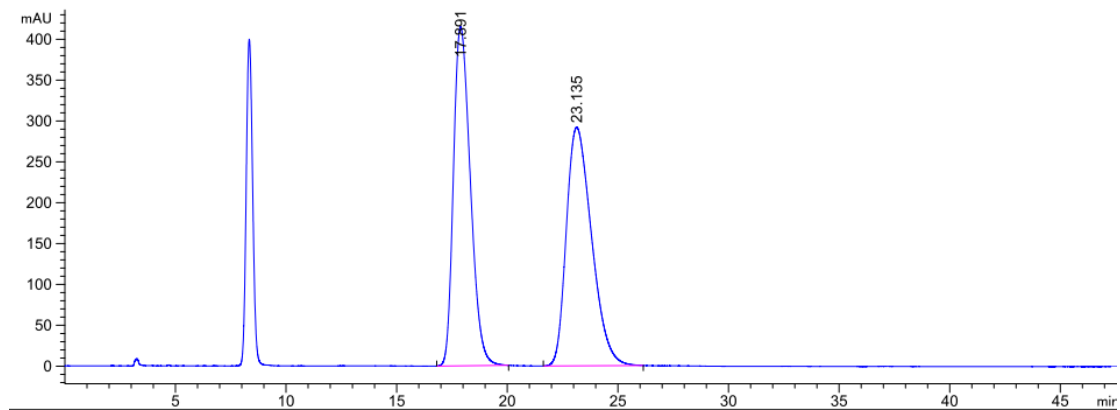

| Peak # | RetTime [min] | Type | Width [min] | Area [mAU*s] | Height [mAU] | Area %  |
|--------|---------------|------|-------------|--------------|--------------|---------|
| 1      | 17.891        | BB   | 0.6251      | 2.20414e4    | 414.69690    | 48.7723 |
| 2      | 23.135        | BB   | 0.9274      | 2.31510e4    | 291.86533    | 51.2277 |

**Table 2, entry 10**

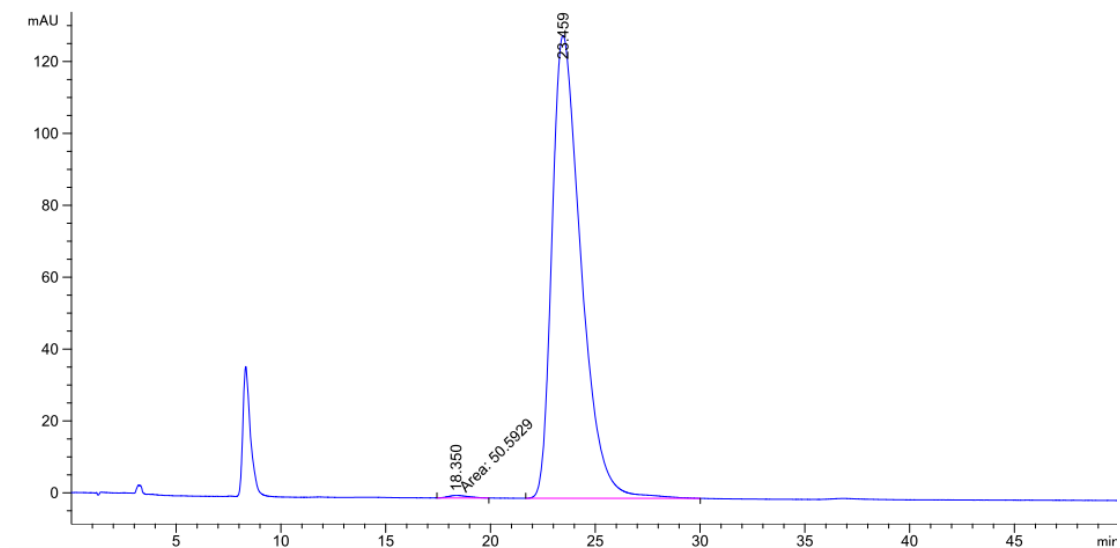

| Peak # | RetTime [min] | Type | Width [min] | Area [mAU*s] | Height [mAU] | Area %  |
|--------|---------------|------|-------------|--------------|--------------|---------|
| 1      | 18.350        | MM   | 1.1487      | 50.59293     | 7.34071e-1   | 0.4076  |
| 2      | 23.459        | BB   | 1.4259      | 1.23612e4    | 128.77695    | 99.5924 |

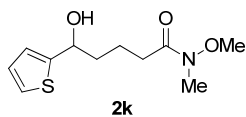

**Racemate:**

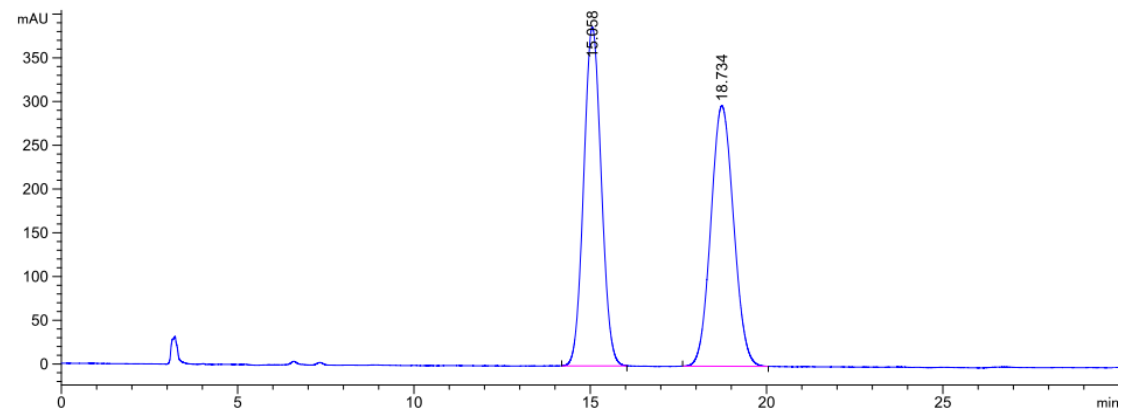

| Peak # | RetTime [min] | Type | Width [min] | Area [mAU*s] | Height [mAU] | Area %  |
|--------|---------------|------|-------------|--------------|--------------|---------|
| 1      | 15.058        | BV   | 0.4448      | 1.33962e4    | 387.01572    | 50.0359 |
| 2      | 18.734        | VB   | 0.5295      | 1.33770e4    | 297.82297    | 49.9641 |

**Table 2, entry 11**

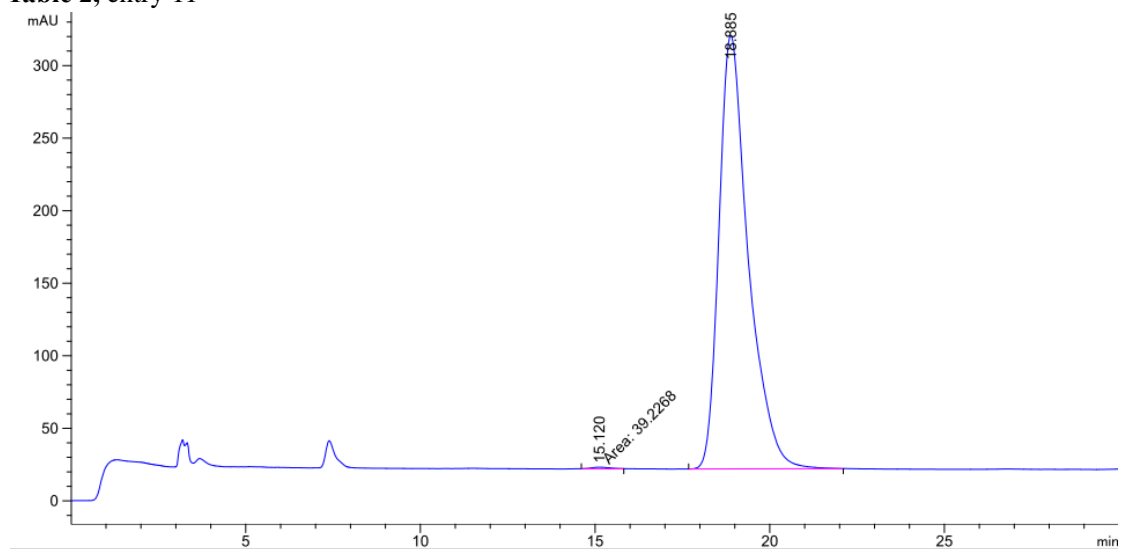

| Peak # | RetTime [min] | Type | Width [min] | Area [mAU*s] | Height [mAU] | Area %  |
|--------|---------------|------|-------------|--------------|--------------|---------|
| 1      | 15.120        | MM   | 0.6186      | 39.22677     | 1.05686      | 0.2246  |
| 2      | 18.885        | BB   | 0.8687      | 1.74249e4    | 298.66132    | 99.7754 |



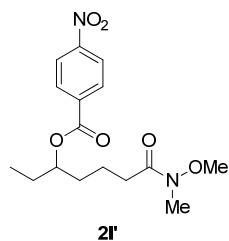

**Racemate:**

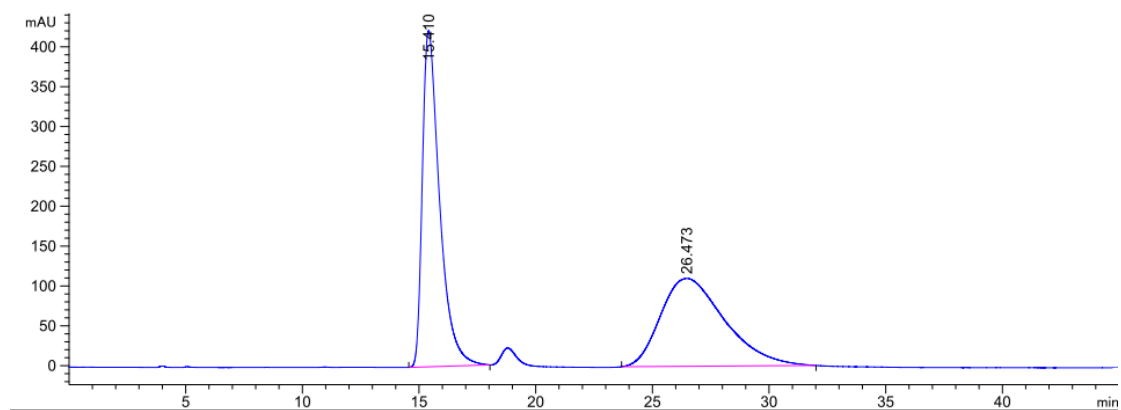

| Peak # | RetTime [min] | Type | Width [min] | Area [mAU*s] | Height [mAU] | Area %  |
|--------|---------------|------|-------------|--------------|--------------|---------|
| 1      | 15.410        | BB   | 0.6964      | 2.16257e4    | 421.65881    | 50.7358 |
| 2      | 26.473        | BB   | 2.2266      | 2.09984e4    | 110.24780    | 49.2642 |

**Table 2, entry 12**

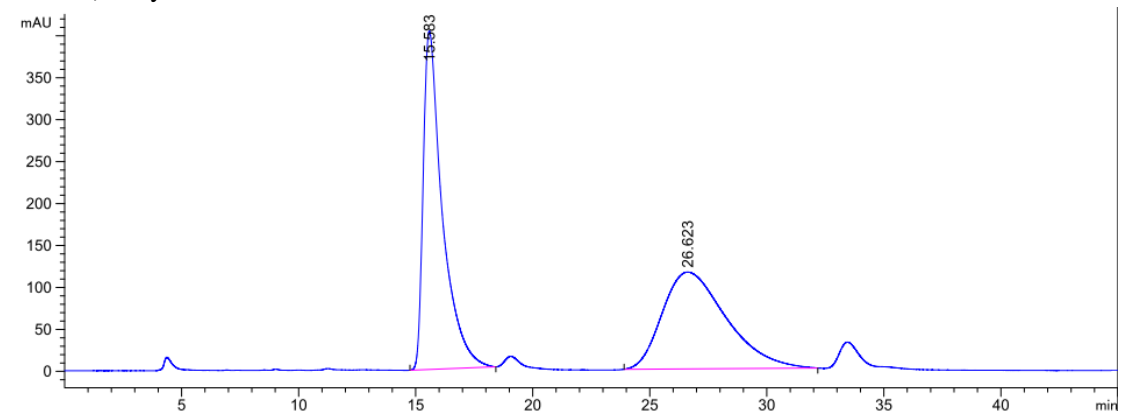

| Peak # | RetTime [min] | Type | Width [min] | Area [mAU*s] | Height [mAU] | Area %  |
|--------|---------------|------|-------------|--------------|--------------|---------|
| 1      | 15.583        | BB   | 0.6819      | 2.29917e4    | 403.13541    | 51.2803 |
| 2      | 26.623        | BB   | 2.2096      | 2.18437e4    | 115.41436    | 48.7197 |

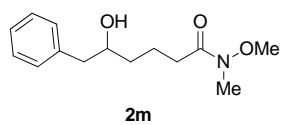

**Racemate:**

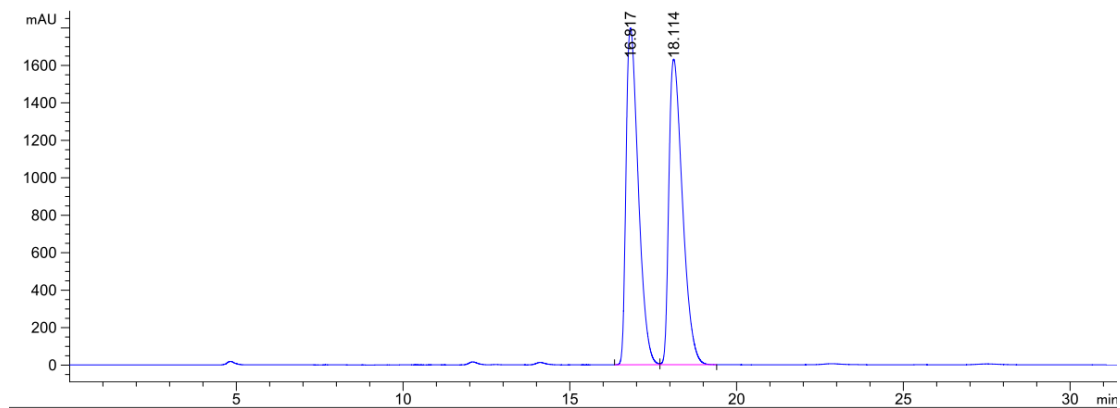

| Peak # | RetTime [min] | Type | Width [min] | Area [mAU*s] | Height [mAU] | Area %  |
|--------|---------------|------|-------------|--------------|--------------|---------|
| 1      | 16.817        | VV   | 0.3033      | 4.57359e4    | 1798.02917   | 49.7662 |
| 2      | 18.114        | VB   | 0.3352      | 4.61655e4    | 1630.97144   | 50.2338 |

**Table 2, entry 13**

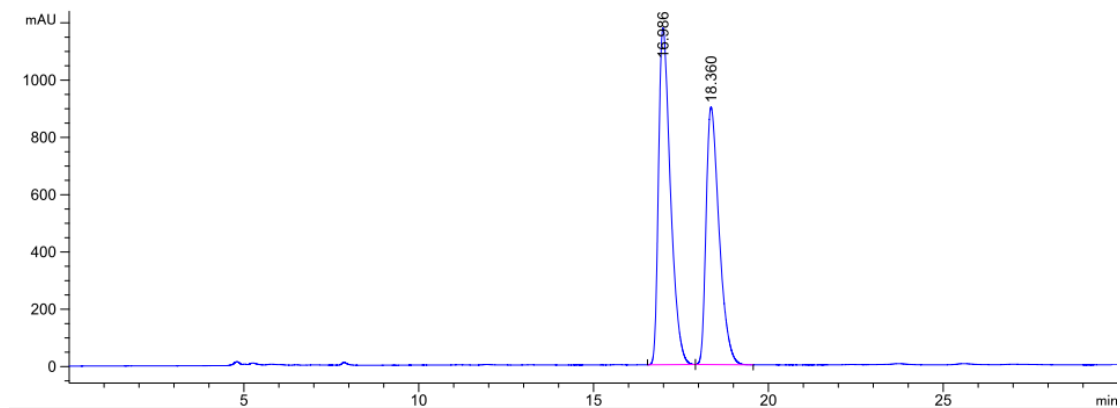

| Peak # | RetTime [min] | Type | Width [min] | Area [mAU*s] | Height [mAU] | Area %  |
|--------|---------------|------|-------------|--------------|--------------|---------|
| 1      | 16.986        | BB   | 0.3355      | 2.77965e4    | 1175.04883   | 54.4364 |
| 2      | 18.360        | BB   | 0.3644      | 2.32658e4    | 898.98187    | 45.5636 |

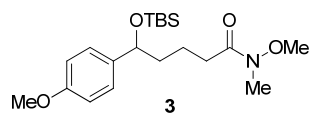

**Racemate:**

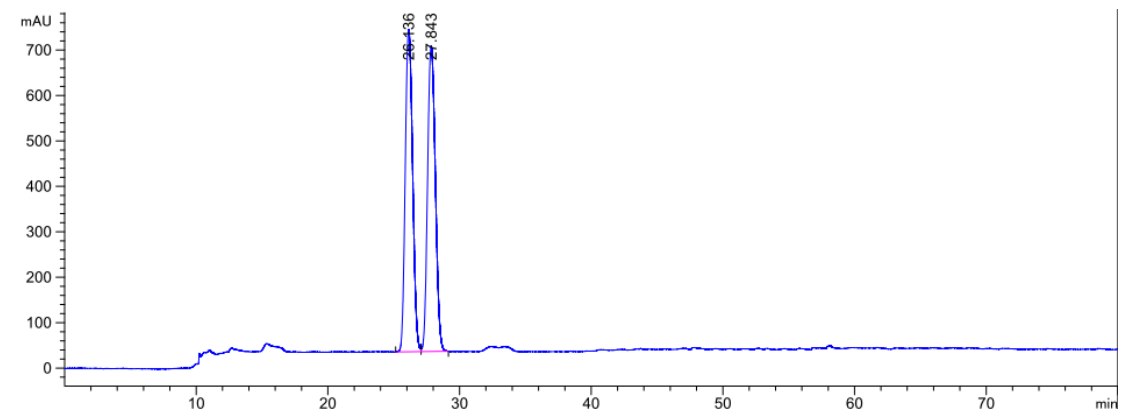

| Peak # | RetTime [min] | Type | Width [min] | Area [mAU*s] | Height [mAU] | Area %  |
|--------|---------------|------|-------------|--------------|--------------|---------|
| 1      | 26.136        | BV   | 0.4571      | 2.75571e4    | 708.78668    | 49.9571 |
| 2      | 27.843        | VB   | 0.4811      | 2.76044e4    | 672.24316    | 50.0429 |

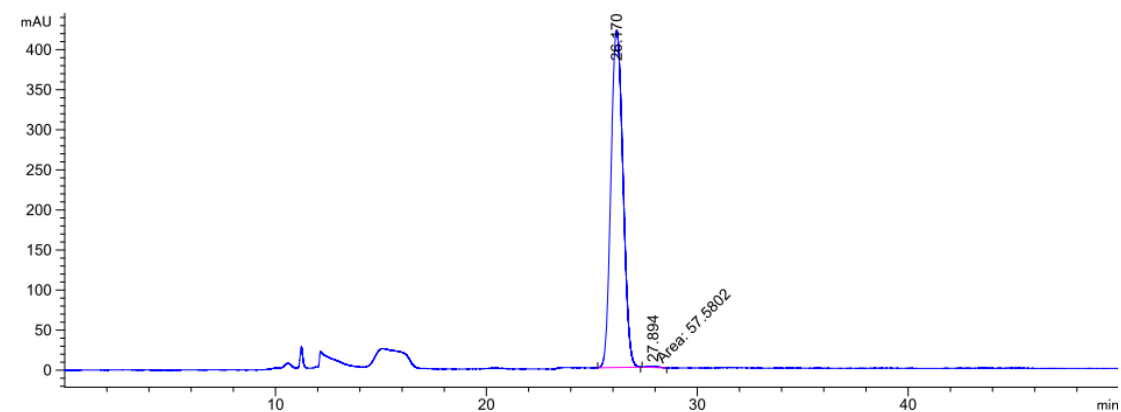

| Peak # | RetTime [min] | Type | Width [min] | Area [mAU*s] | Height [mAU] | Area %  |
|--------|---------------|------|-------------|--------------|--------------|---------|
| 1      | 26.170        | VV   | 0.4647      | 1.66698e4    | 420.80594    | 99.6558 |
| 2      | 27.894        | MM   | 0.6219      | 57.58016     | 1.54314      | 0.3442  |

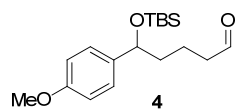

**Racemate:**

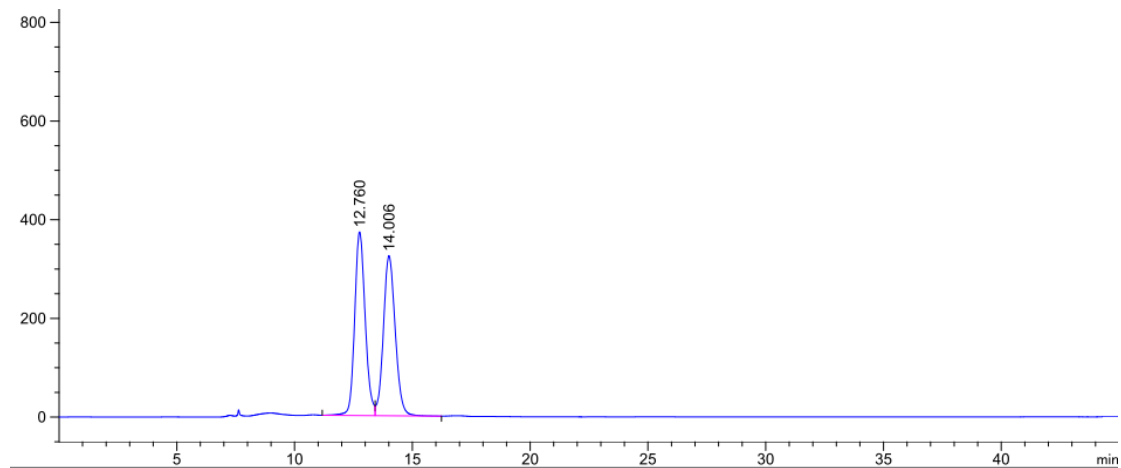

| Peak # | RetTime [min] | Type | Width [min] | Area [mAU*s] | Height [mAU] | Area %  |
|--------|---------------|------|-------------|--------------|--------------|---------|
| 1      | 12.760        | BV   | 0.4619      | 1.15473e4    | 372.28629    | 50.4611 |
| 2      | 14.006        | VB   | 0.5118      | 1.13362e4    | 324.31754    | 49.5389 |

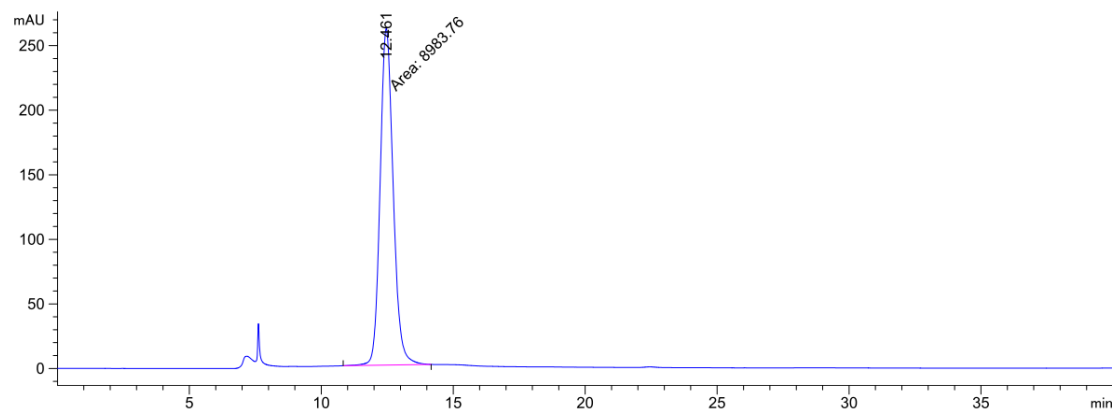

| Peak # | RetTime [min] | Type | Width [min] | Area [mAU*s] | Height [mAU] | Area %   |
|--------|---------------|------|-------------|--------------|--------------|----------|
| 1      | 12.461        | MM   | 0.5746      | 8983.75684   | 260.57510    | 100.0000 |
